# Supplementary material for: An efficient and scalable synthesis of 2,4-di-N-acetyl-l-altrose (l-2,4-Alt-diNAc)
Source: Royal Society of Chemistry journal article supplement (doi:10.1039/d1ra01070k), 2021-01-01

## **Supporting Information**

### **An Efficient and Scalable Synthesis of 2,4-Di-N-acetyl-L-altrose (L-2,4-Alt-DiNAc)**

**Anna Niedzwiecka, Carita Sequeira, Ping Zhang and Chang-Chun Ling\***

Department of Chemistry, University of Calgary, 2500 University of Calgary, Calgary  
Alberta T2N 1N4, Canada.

Email: *ccling@ucalgary.ca*

## Table of Contents

|                                   |           |
|-----------------------------------|-----------|
| NMR Spectra of compound <b>10</b> | <b>3</b>  |
| NMR Spectra of compound <b>11</b> | <b>7</b>  |
| NMR Spectra of compound <b>12</b> | <b>11</b> |
| NMR Spectra of compound <b>16</b> | <b>15</b> |
| NMR Spectra of compound <b>17</b> | <b>19</b> |
| NMR Spectra of compound <b>20</b> | <b>23</b> |
| NMR Spectra of compound <b>22</b> | <b>27</b> |
| NMR Spectra of compound <b>23</b> | <b>31</b> |
| NMR Spectra of compound <b>24</b> | <b>35</b> |
| NMR Spectra of compound <b>25</b> | <b>39</b> |
| NMR Spectra of compound <b>26</b> | <b>43</b> |
| NMR Spectra of compound <b>27</b> | <b>47</b> |
| NMR Spectra of compound <b>28</b> | <b>51</b> |
| NMR Spectra of compound <b>29</b> | <b>55</b> |
| NMR Spectra of compound <b>30</b> | <b>59</b> |
| NMR Spectra of compound <b>32</b> | <b>63</b> |
| NMR Spectra of compound <b>5</b>  | <b>67</b> |
| NMR Spectra of compound <b>36</b> | <b>71</b> |

$^1\text{H}$  NMR spectrum of compound **10** in  $\text{CDCl}_3$  (400 MHz)

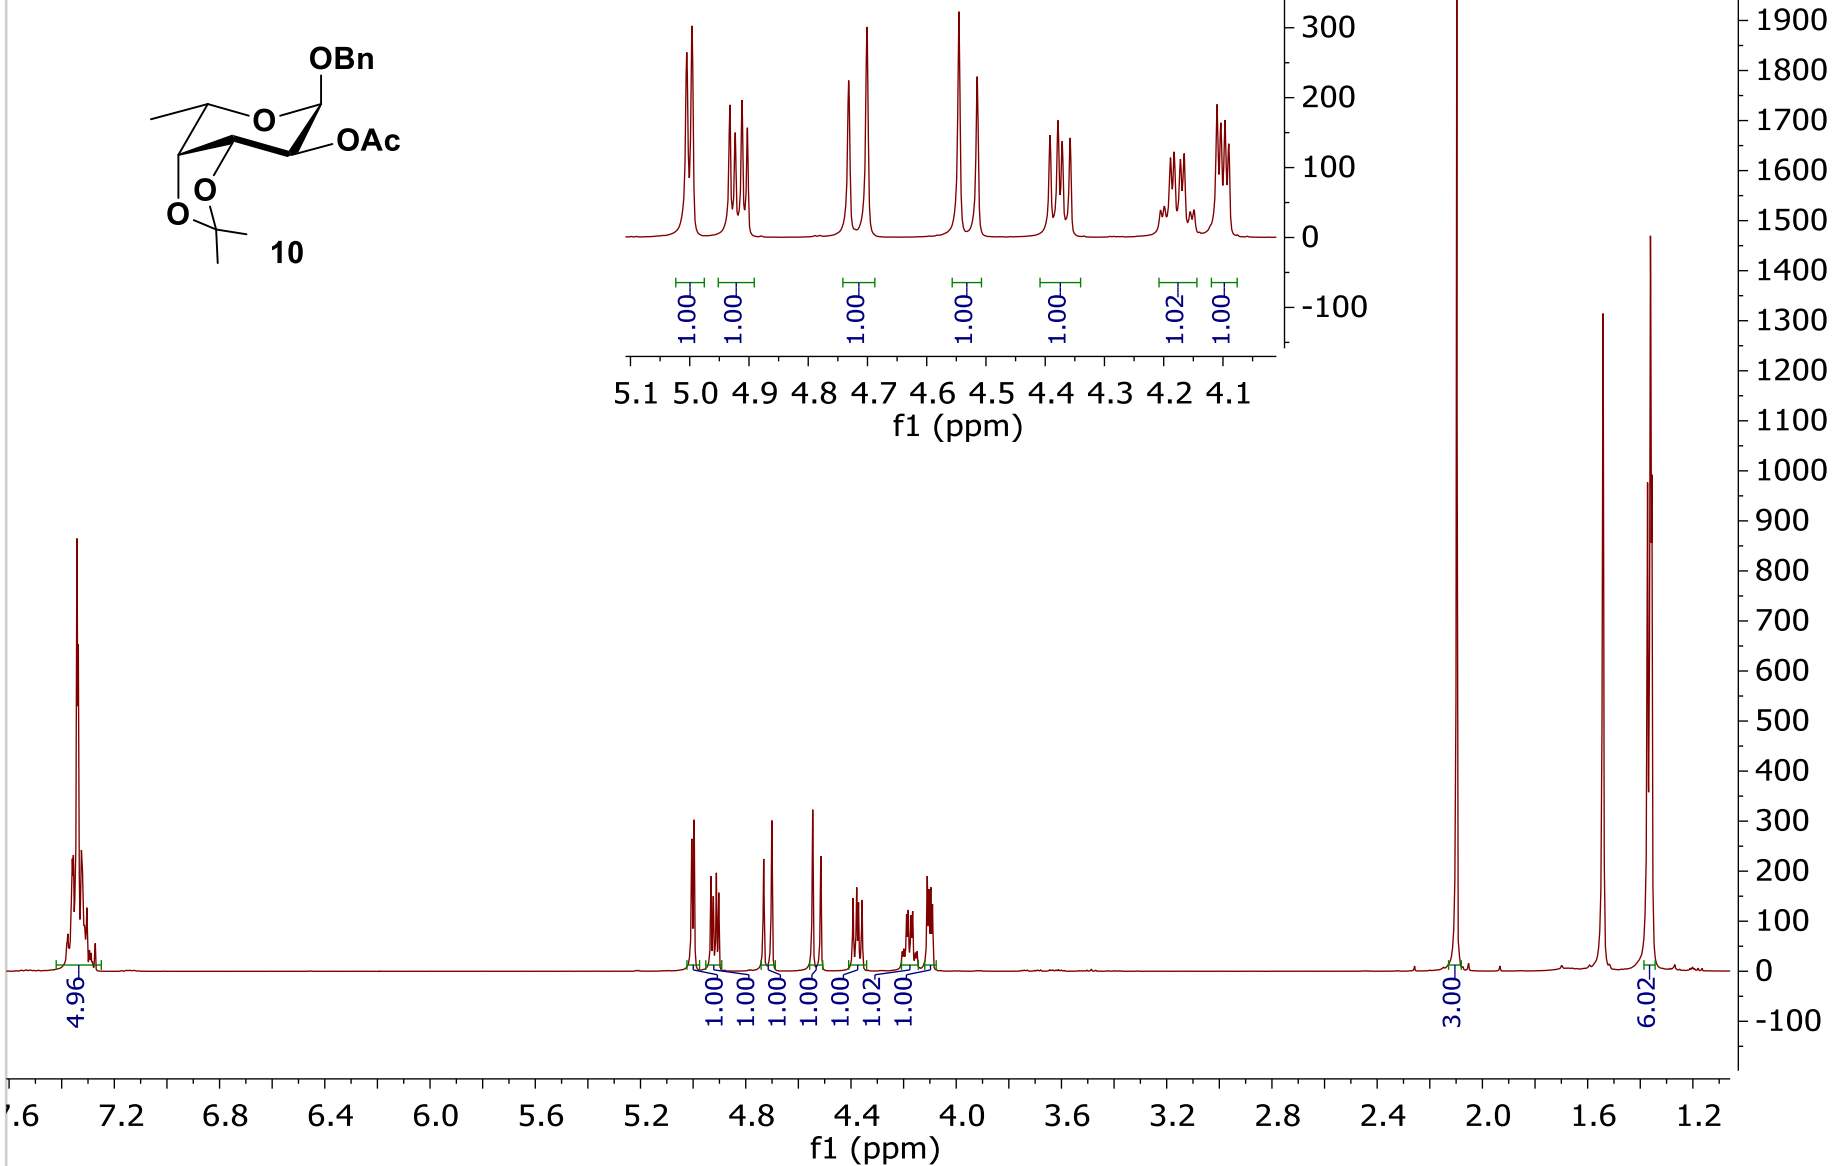

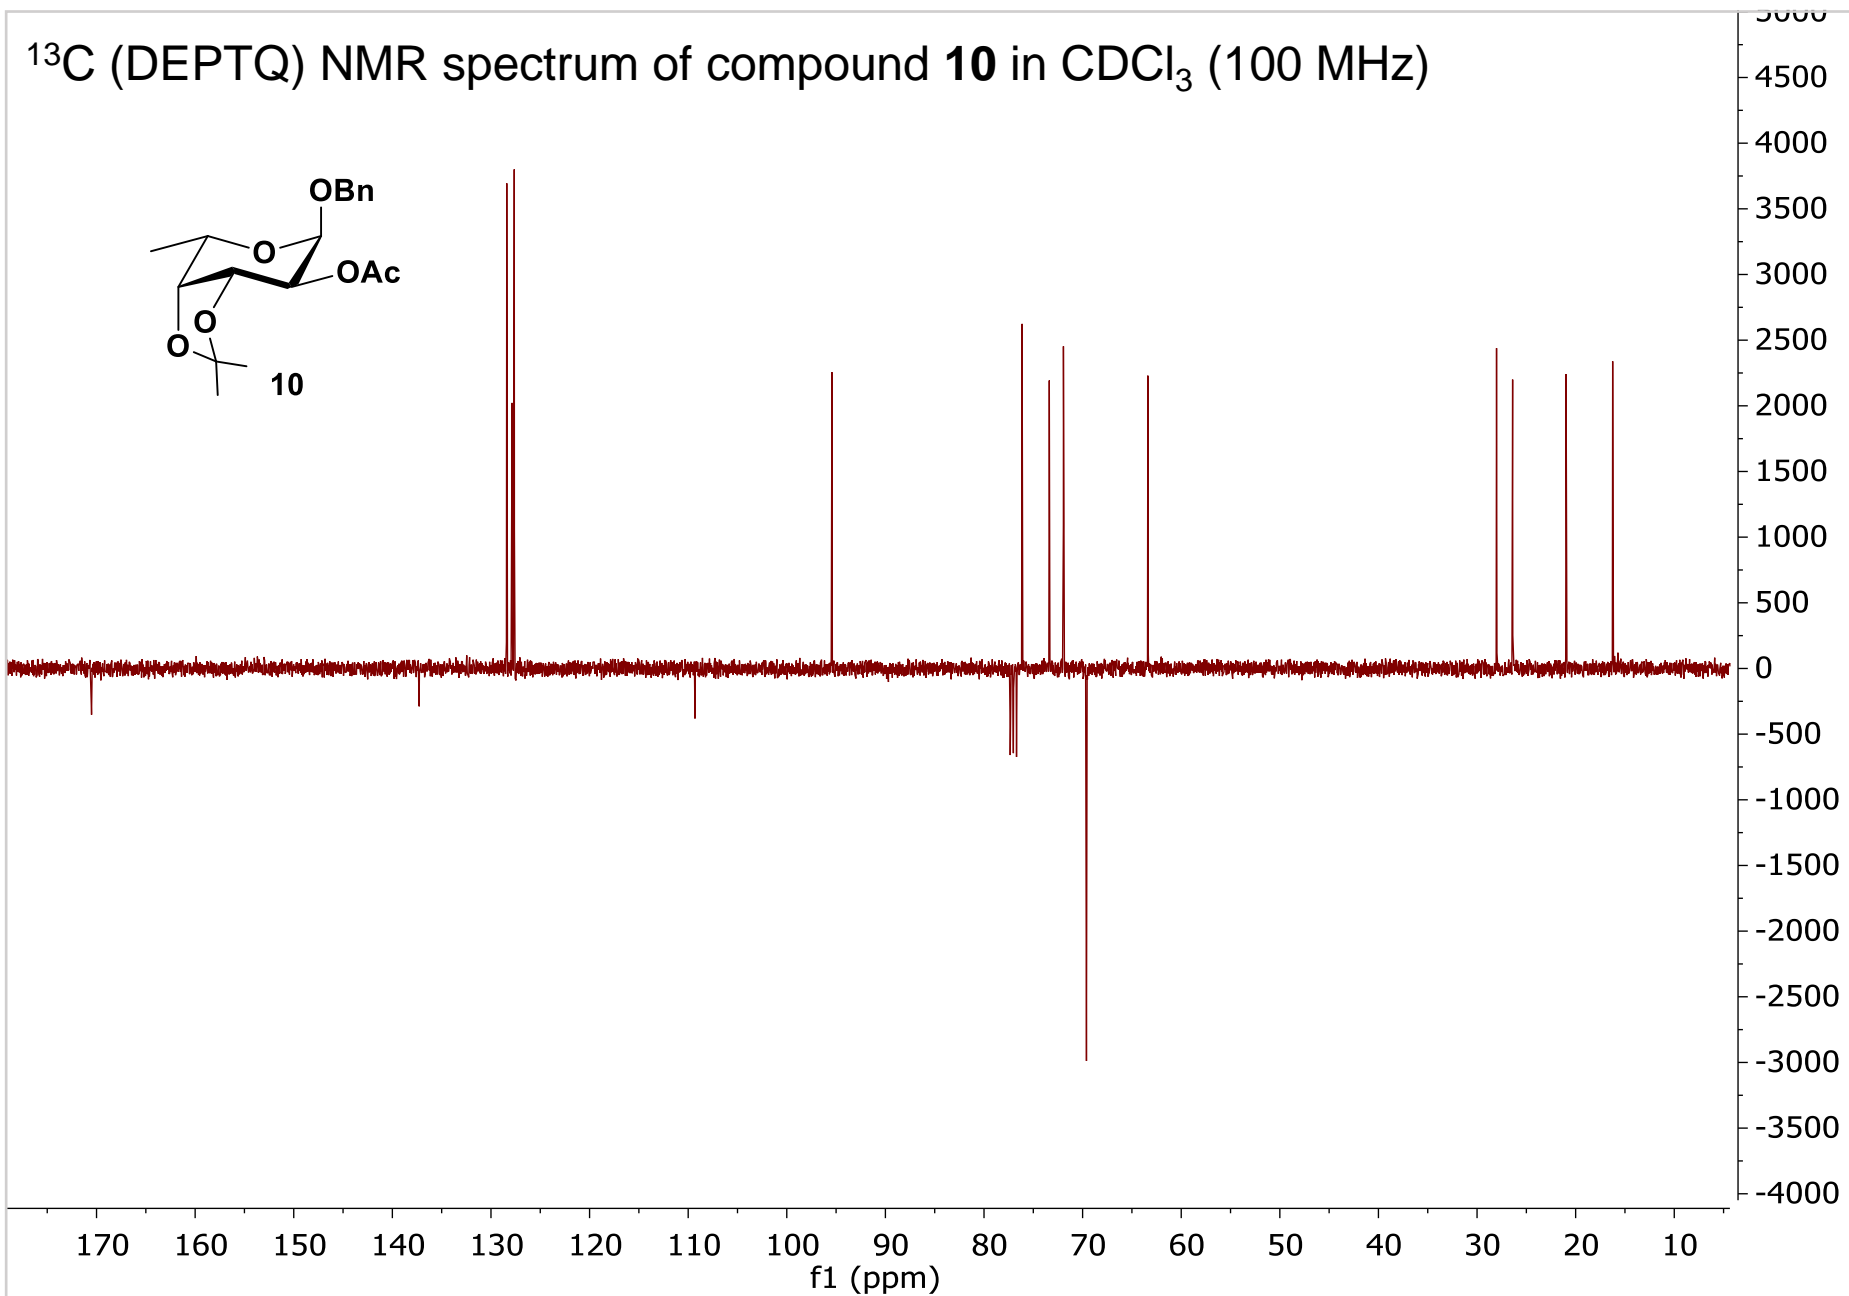

$^1\text{H}$ - $^1\text{H}$  GCOSY NMR spectrum of compound **10** in  $\text{CDCl}_3$

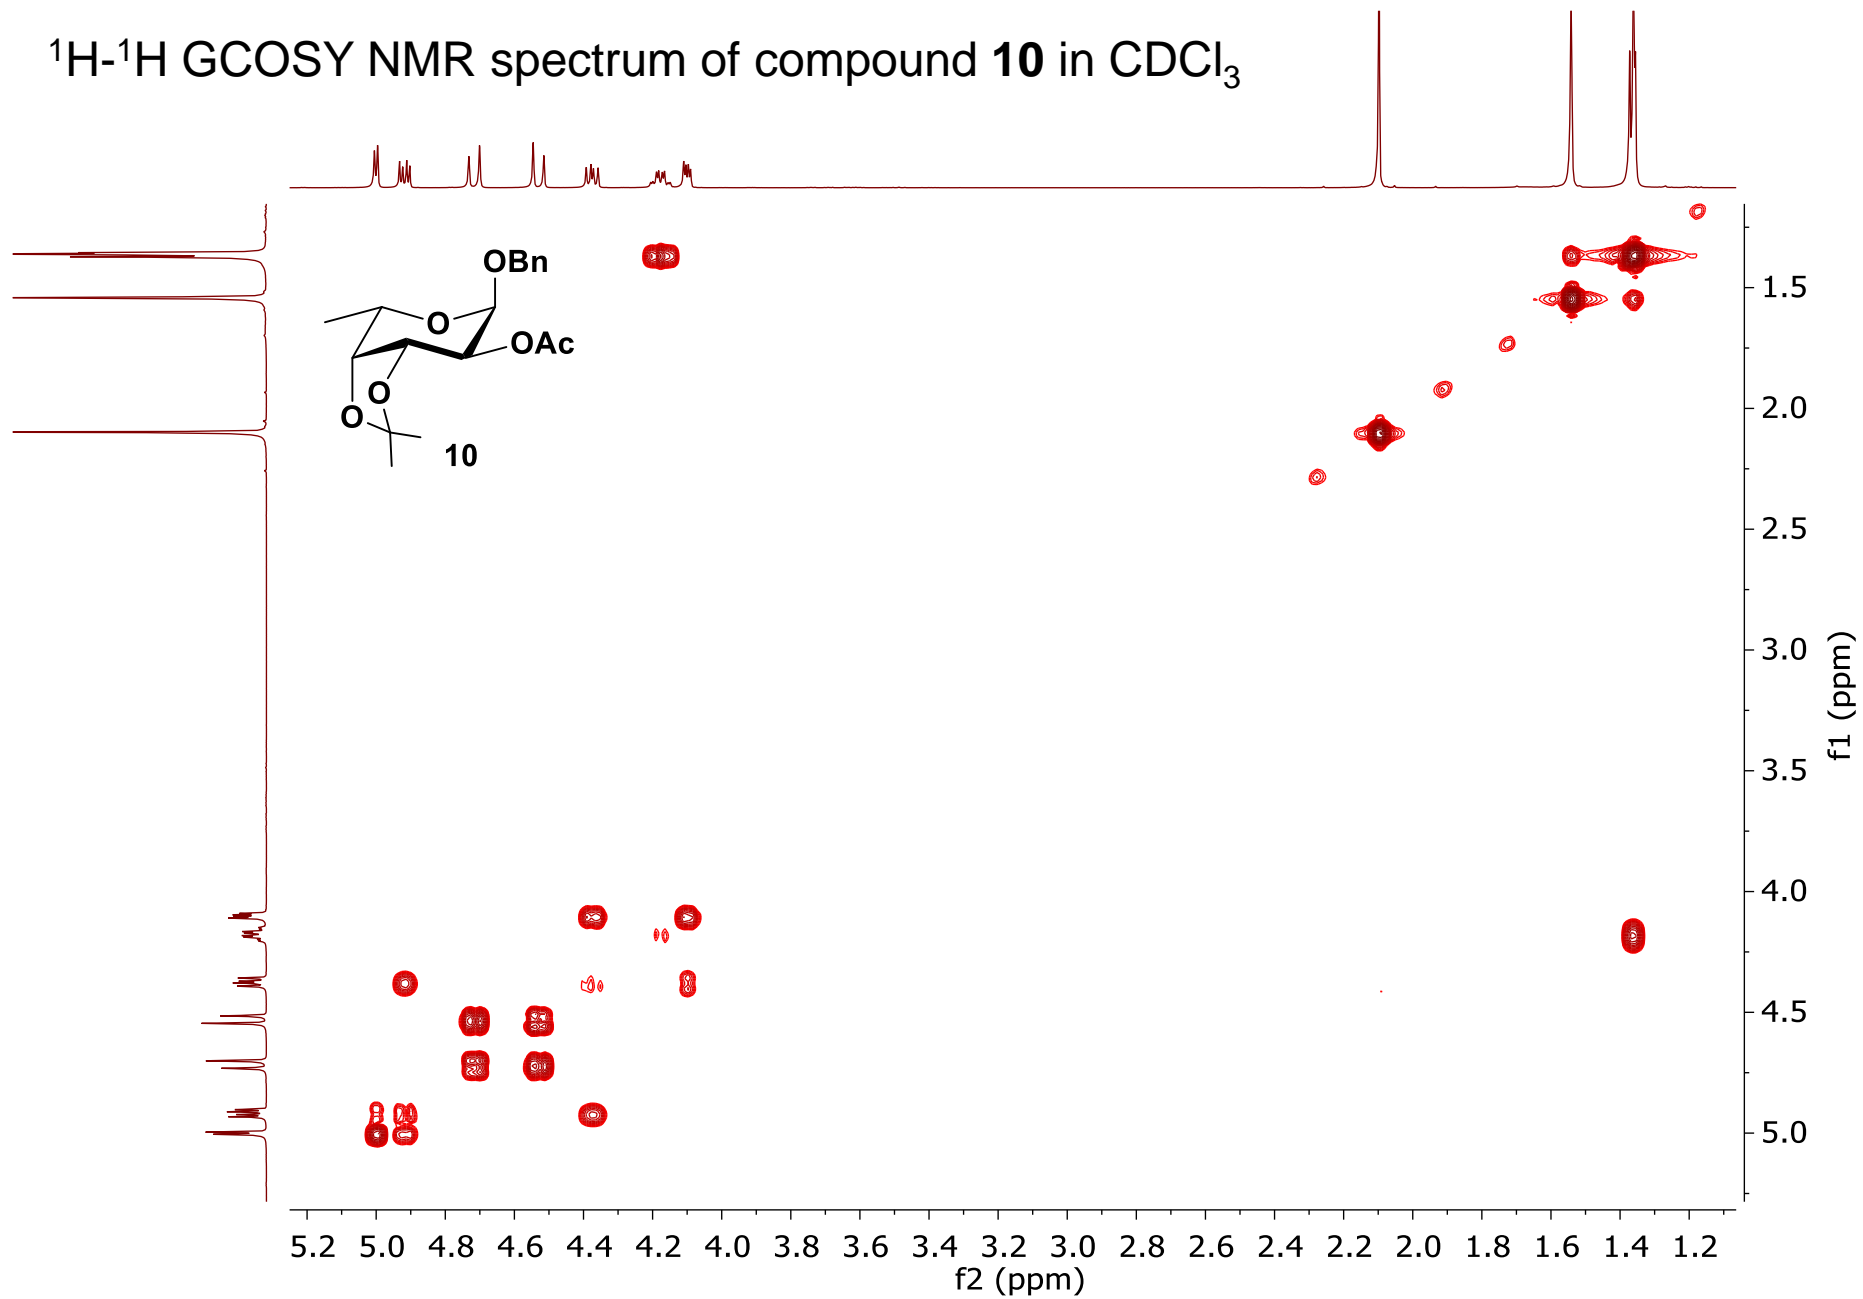

$^1\text{H}$ - $^{13}\text{C}$  GHSQC NMR spectrum of compound **10** in  $\text{CDCl}_3$

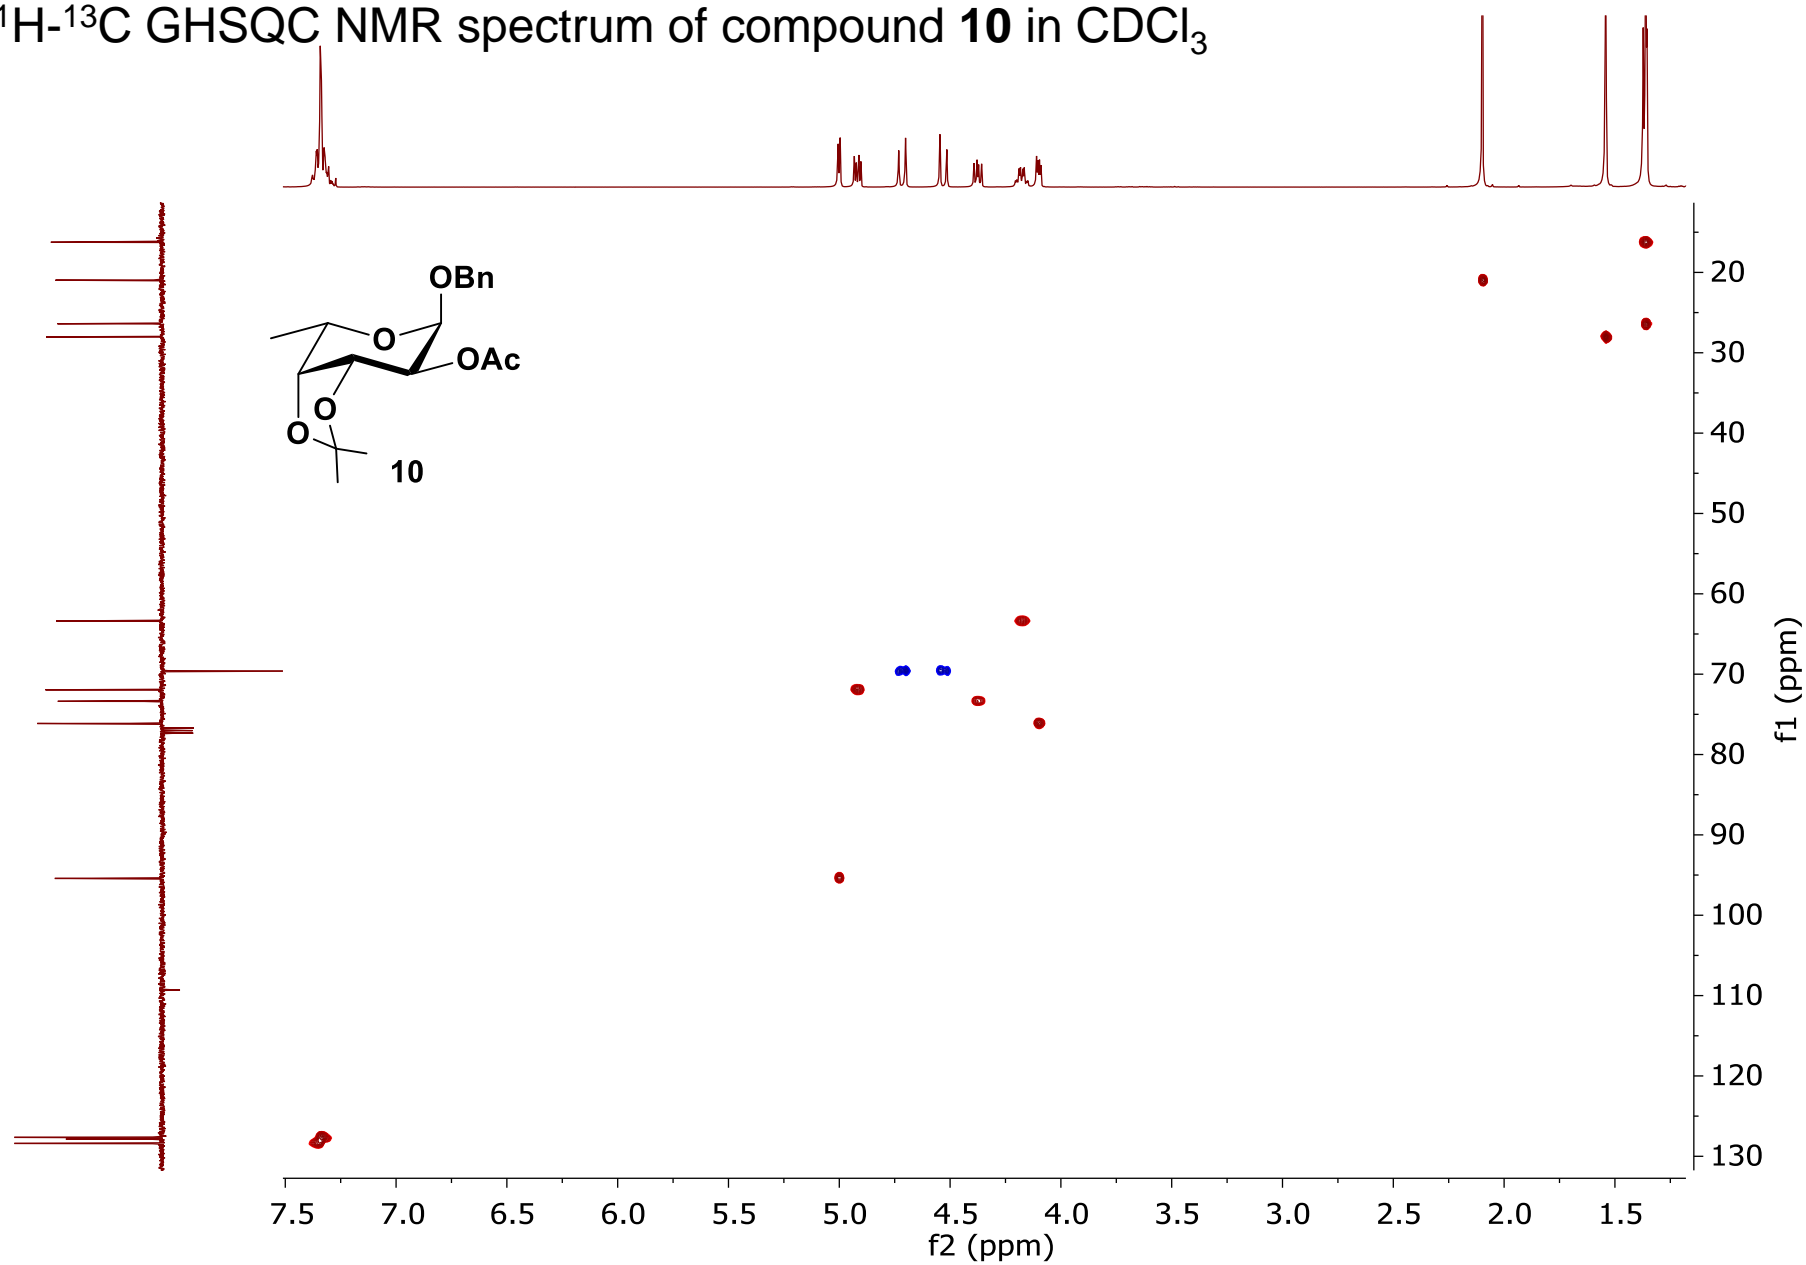

$^1\text{H}$  NMR spectrum of compound **11** in  $\text{CDCl}_3$  (400 MHz)

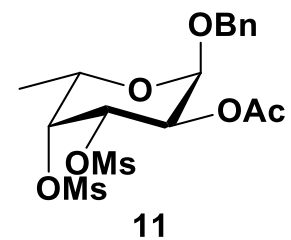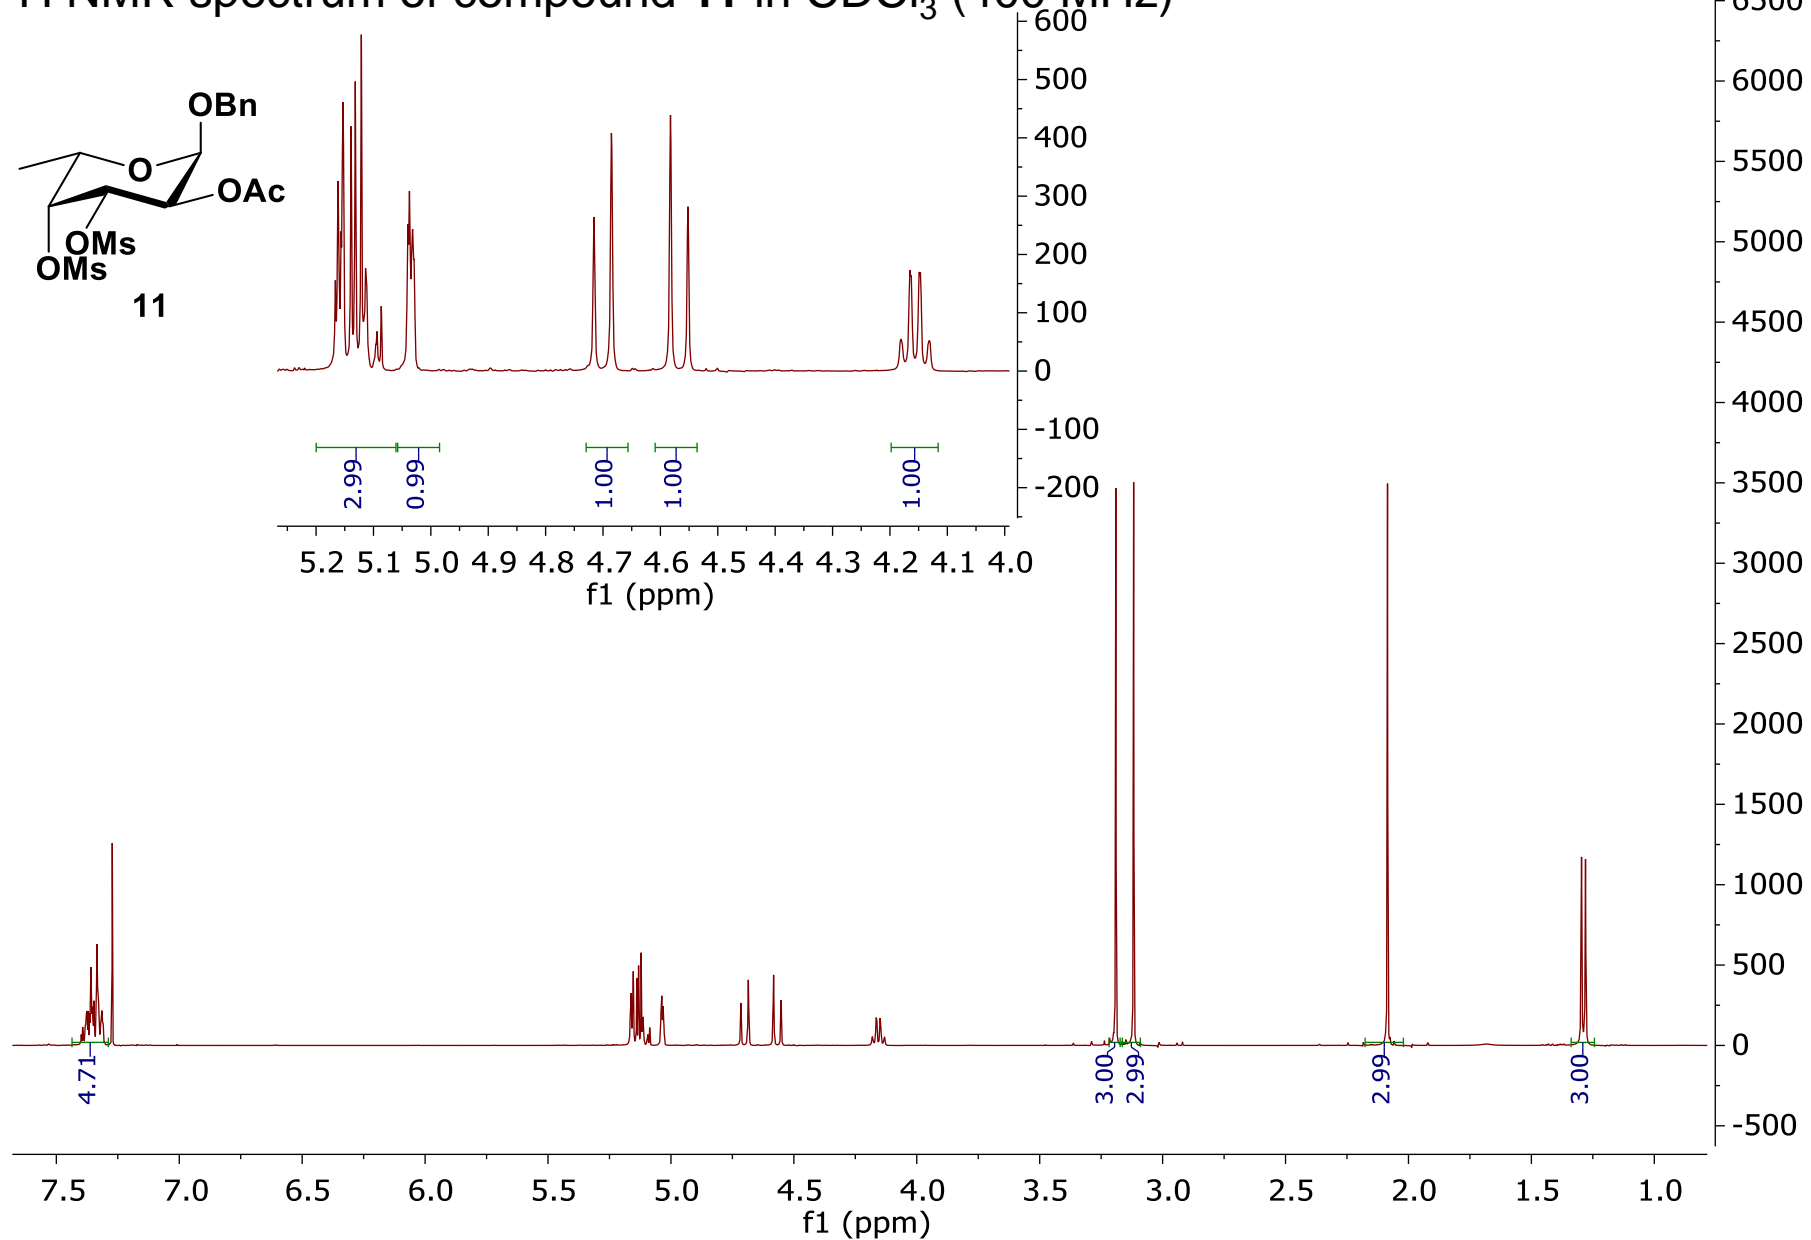

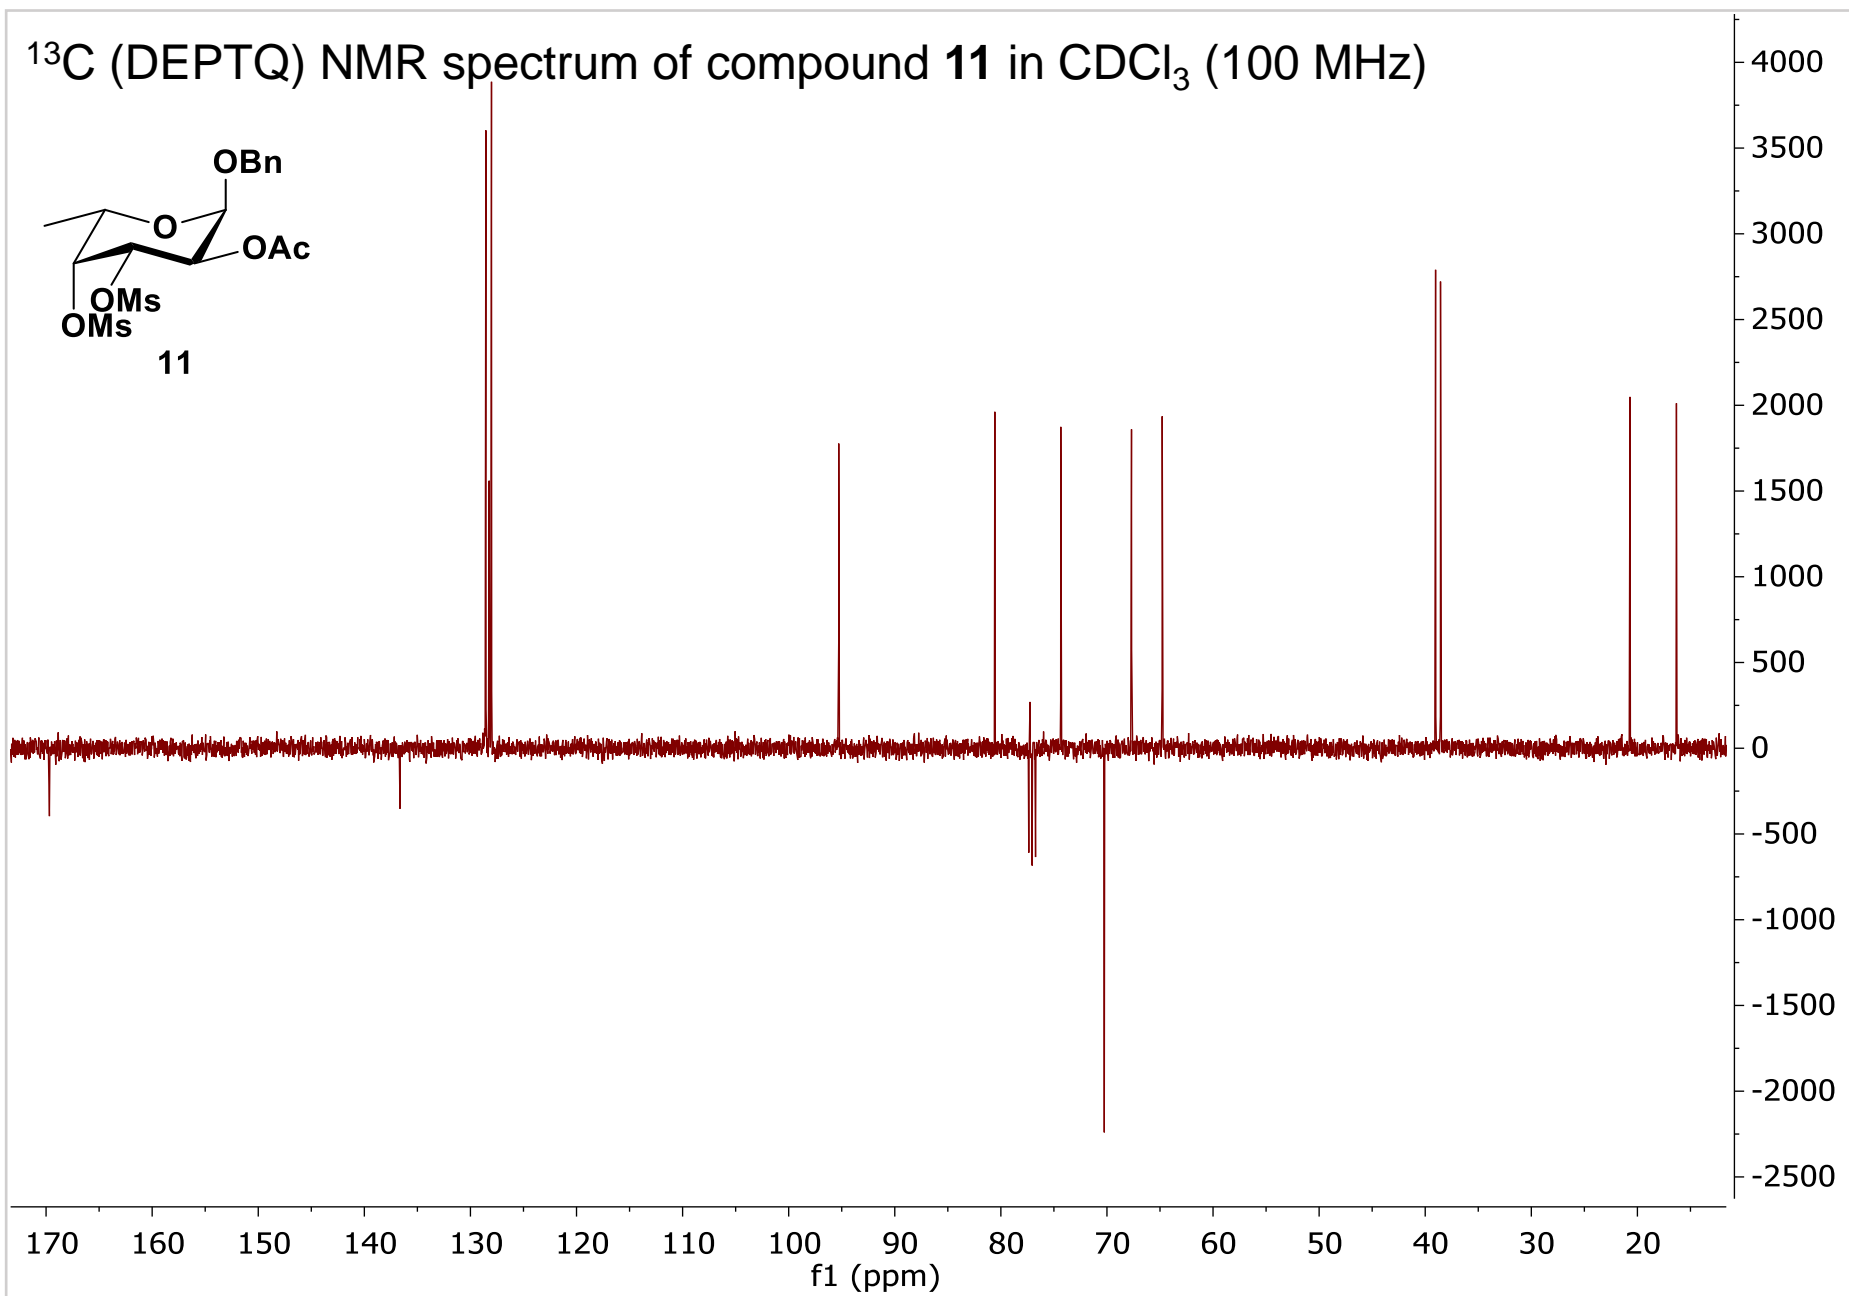



$^1\text{H}$ - $^1\text{H}$  GCOSY NMR spectrum of compound **11** in  $\text{CDCl}_3$

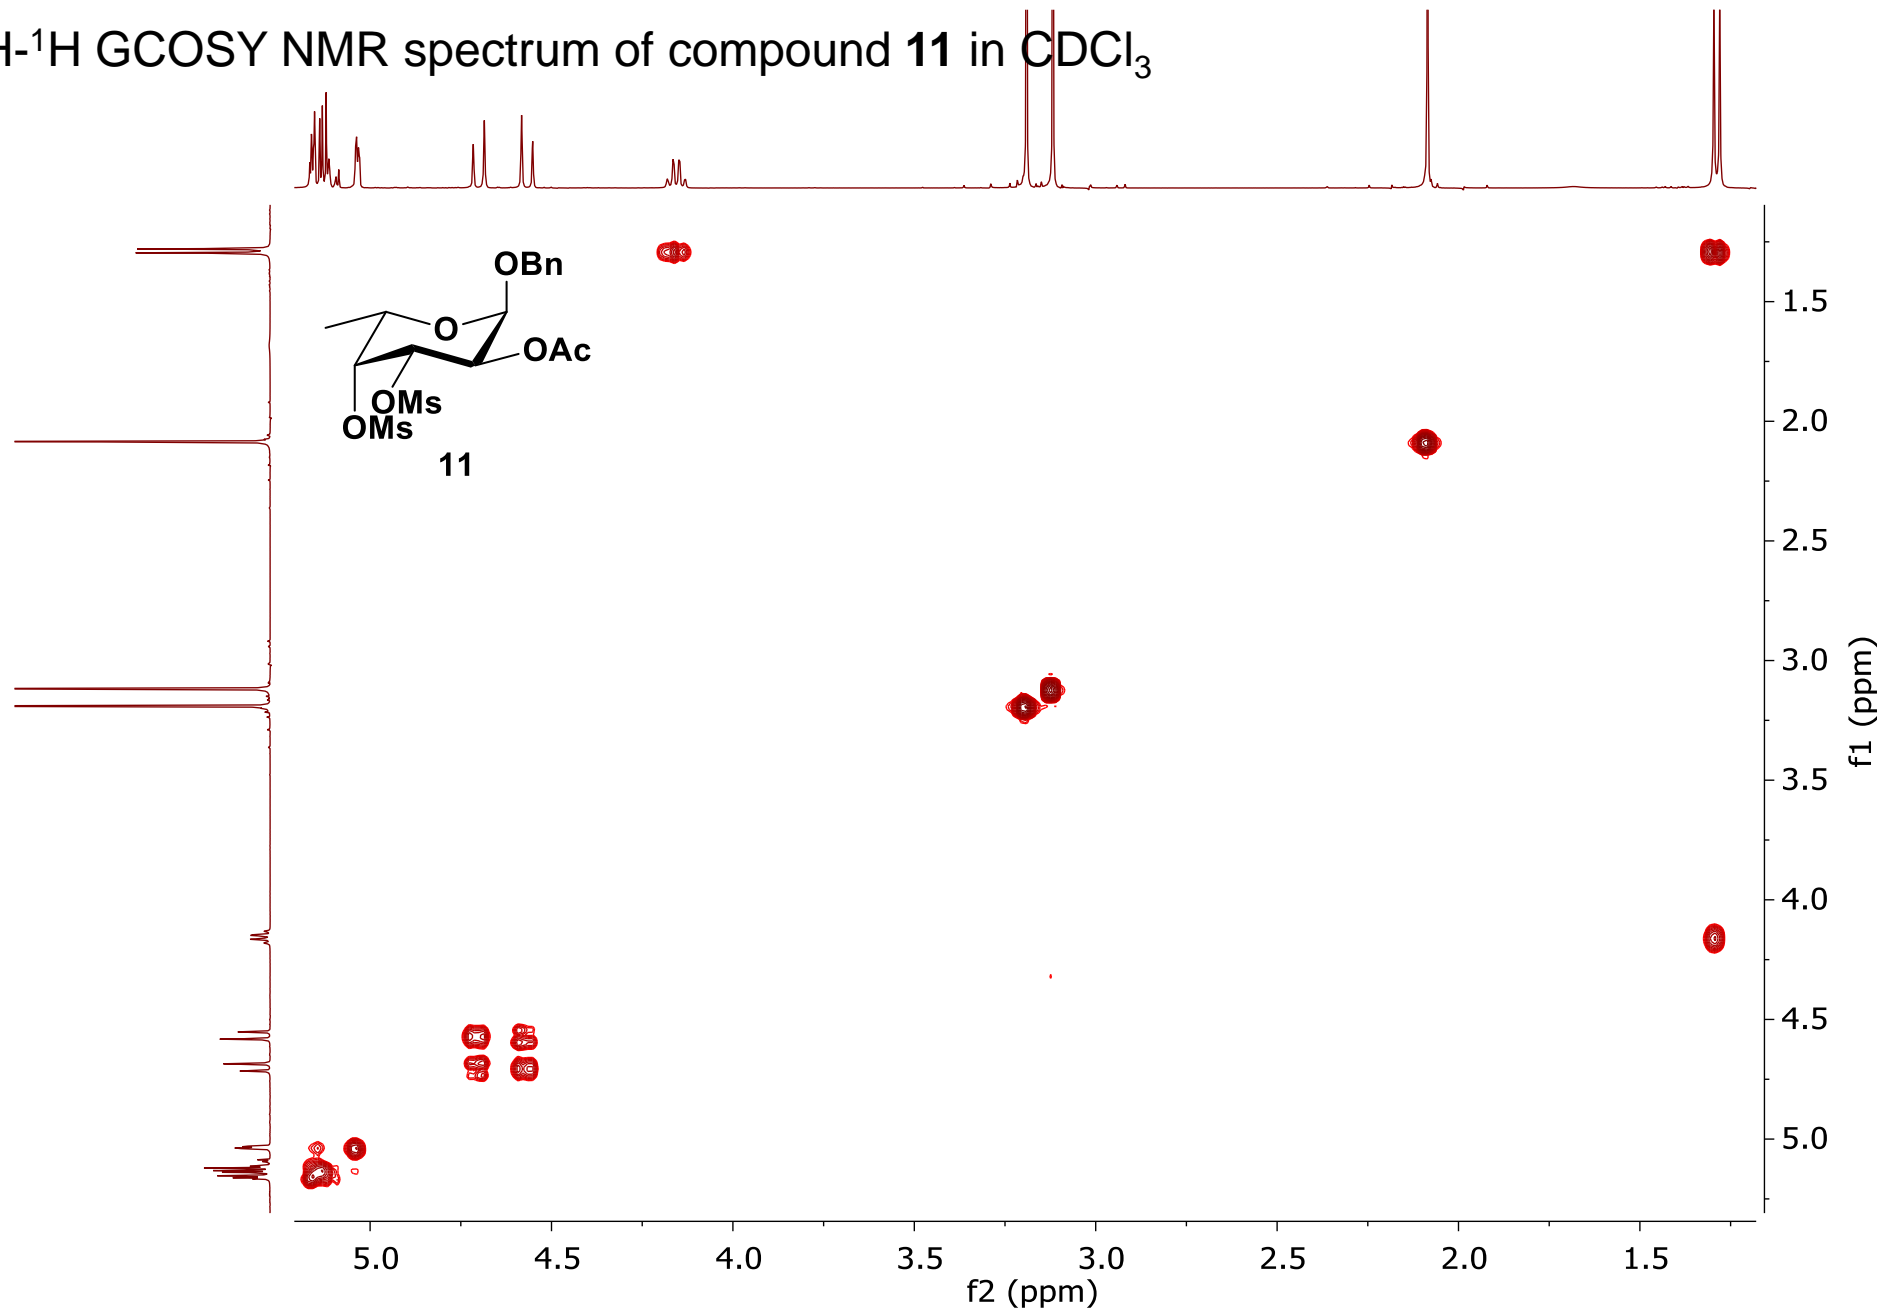

$^1\text{H}$ - $^{13}\text{C}$  GHSQC NMR spectrum of compound **11** in  $\text{CDCl}_3$

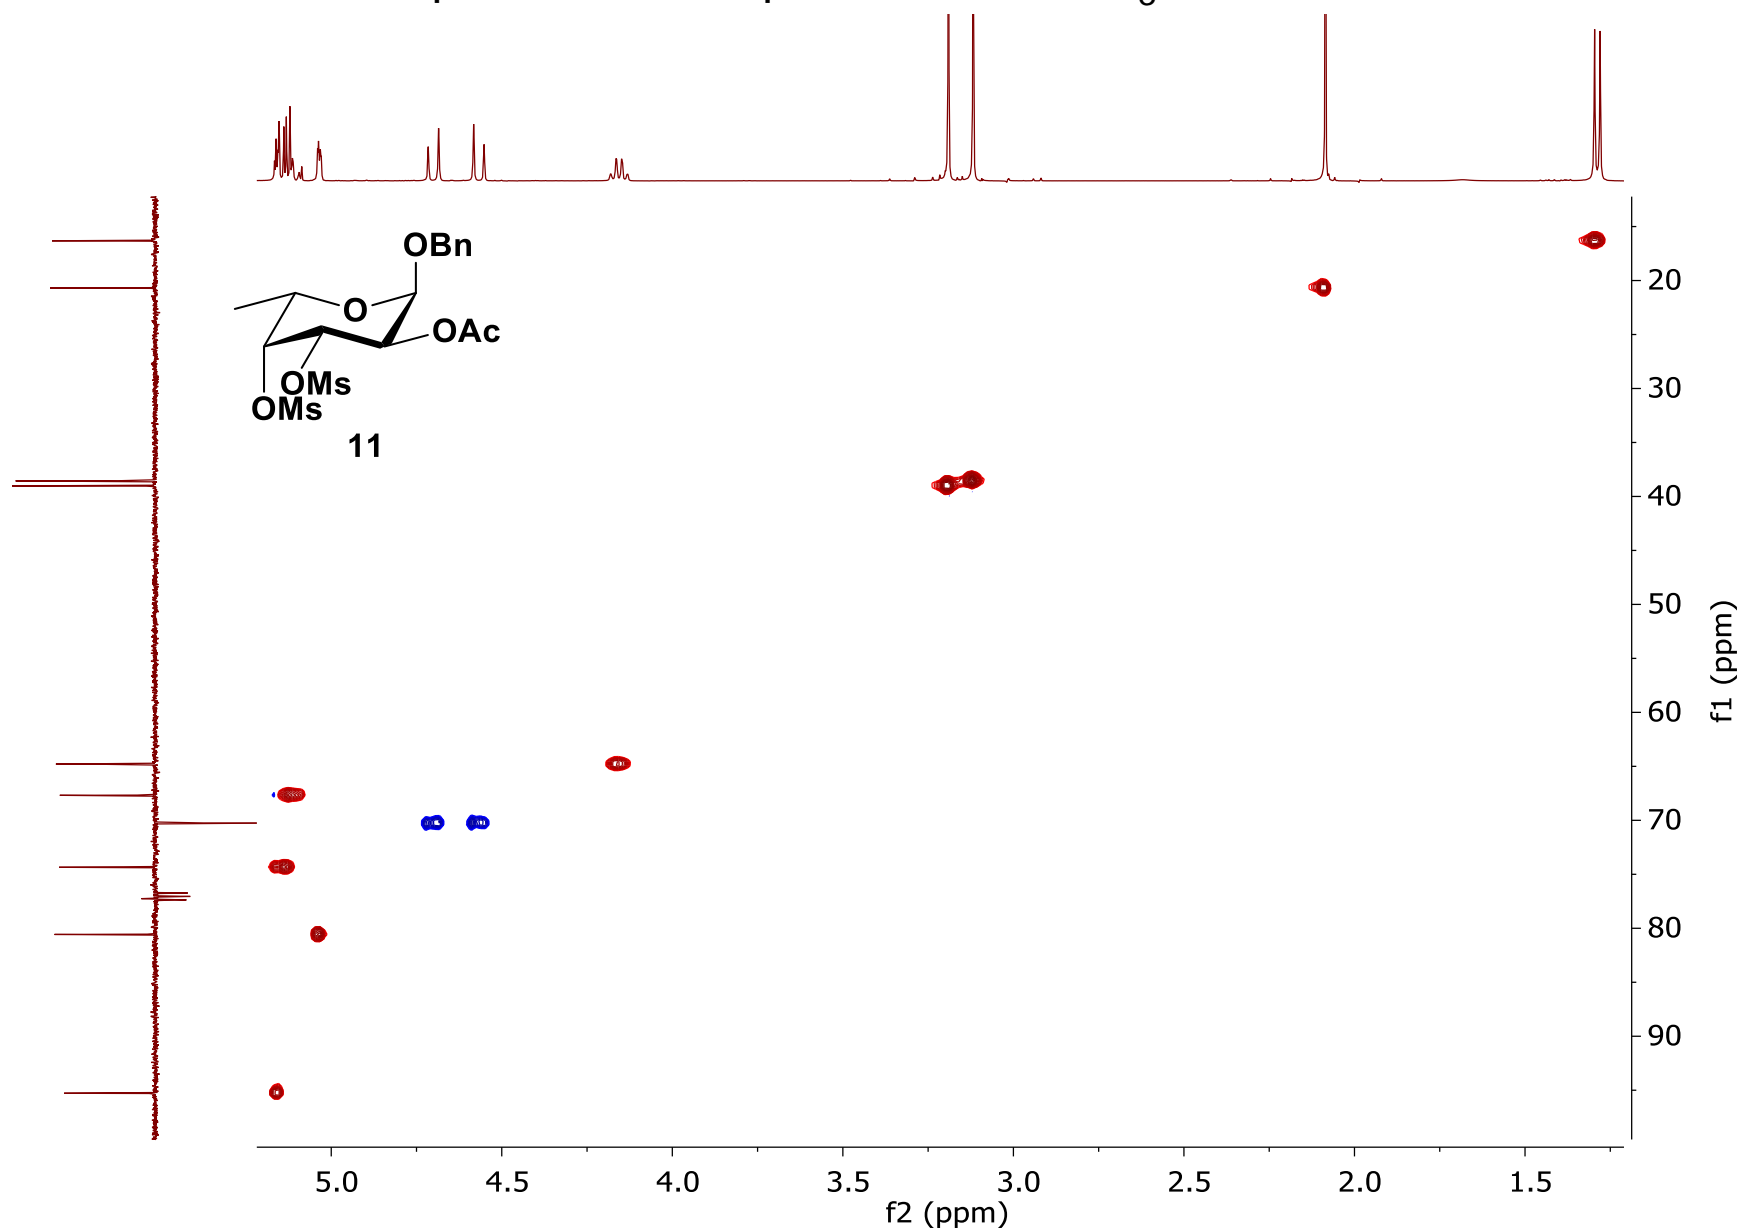

$^1\text{H}$  NMR spectrum of compound **12** in  $\text{CDCl}_3$  (400 MHz)

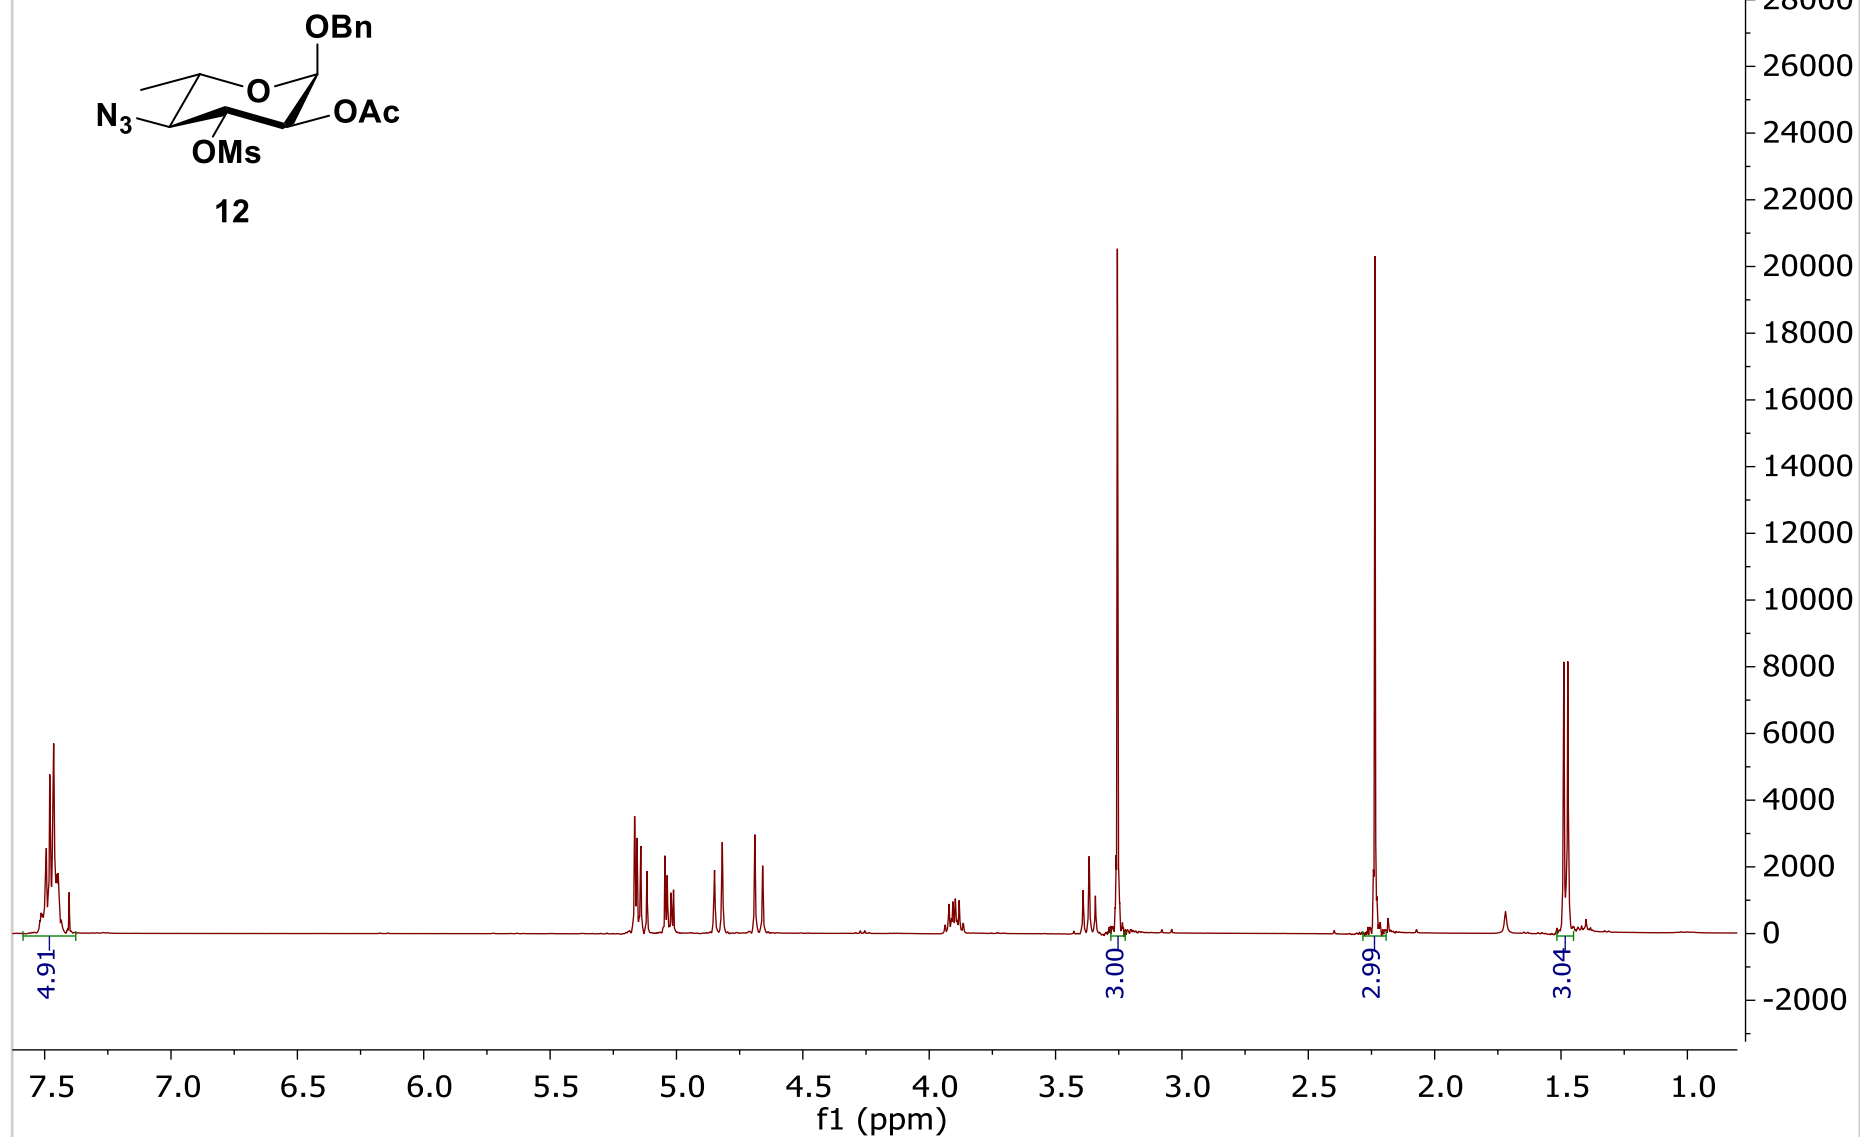

$^{13}\text{C}$  (DEPTQ) NMR spectrum of compound **12** in  $\text{CDCl}_3$  (100 MHz)

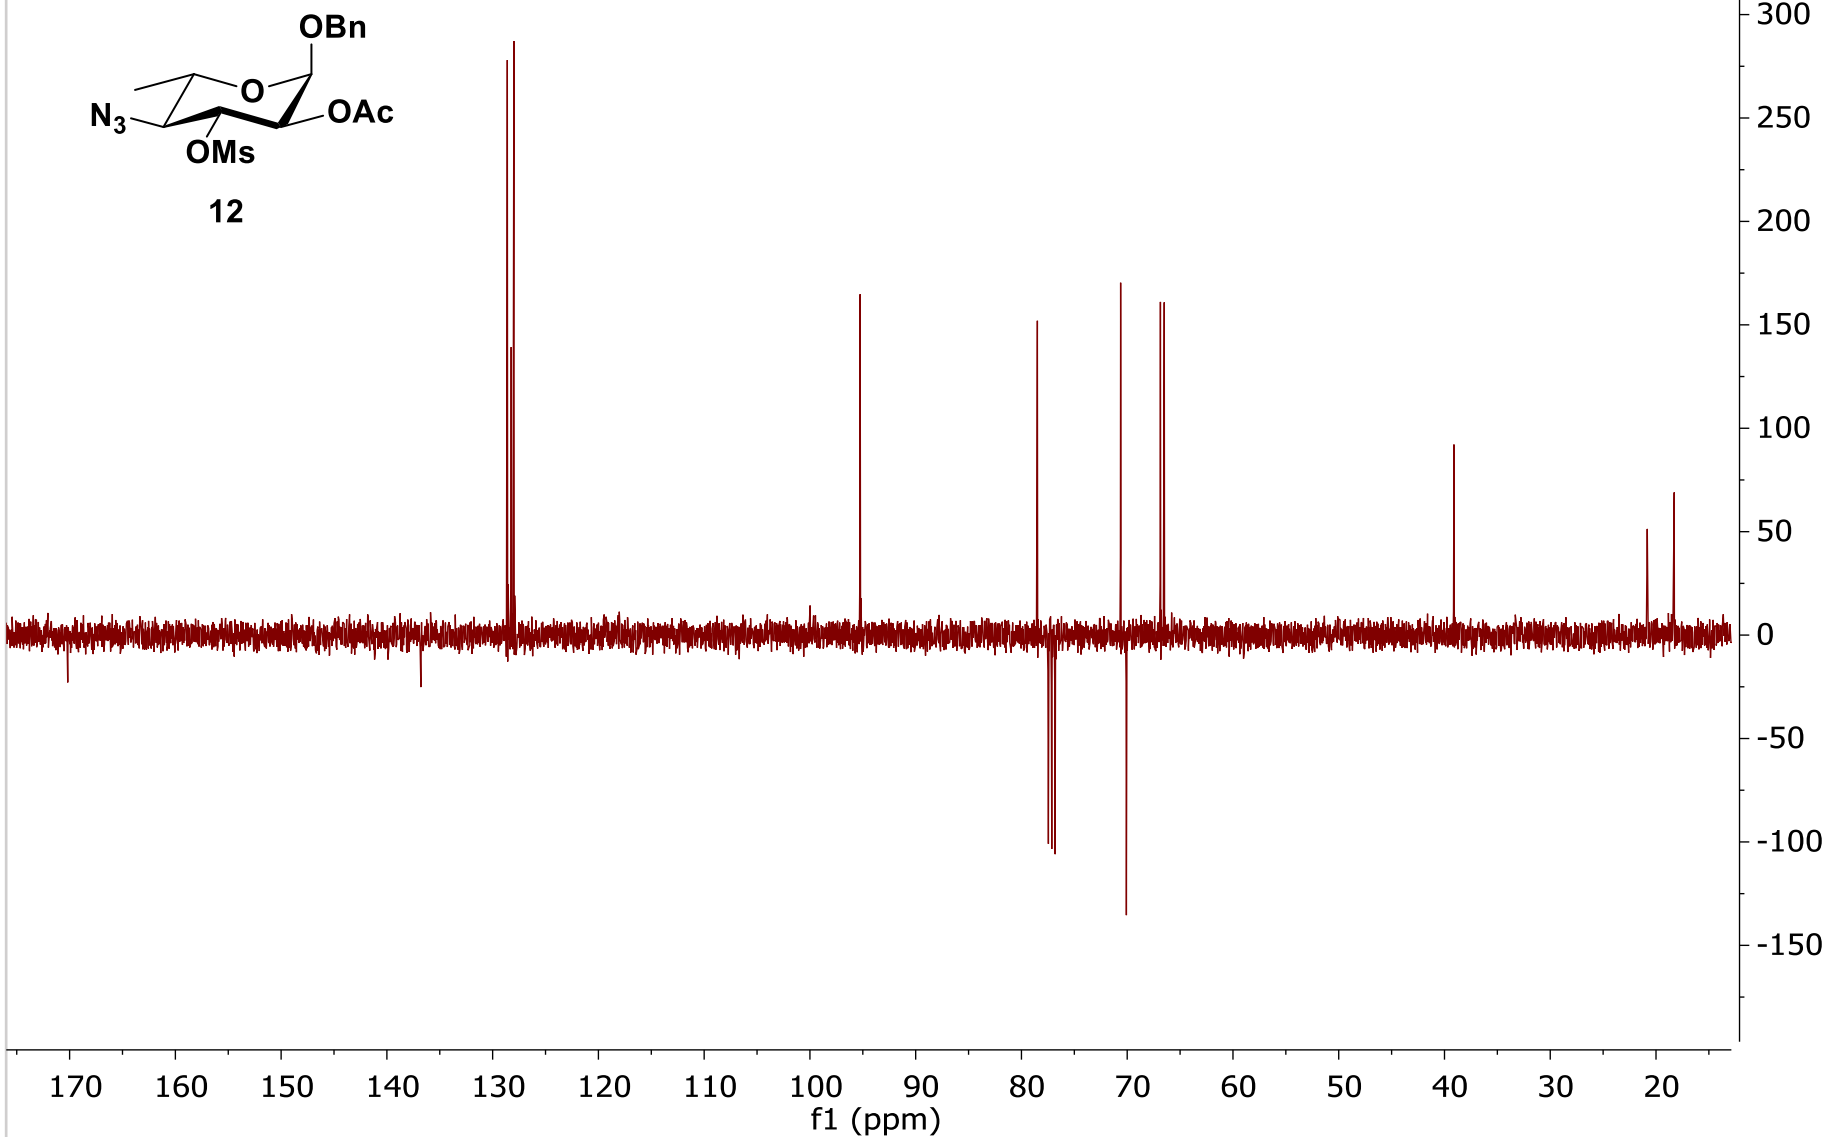

$^1\text{H}$ - $^1\text{H}$  GCOSY NMR spectrum of compound **12** in  $\text{CDCl}_3$

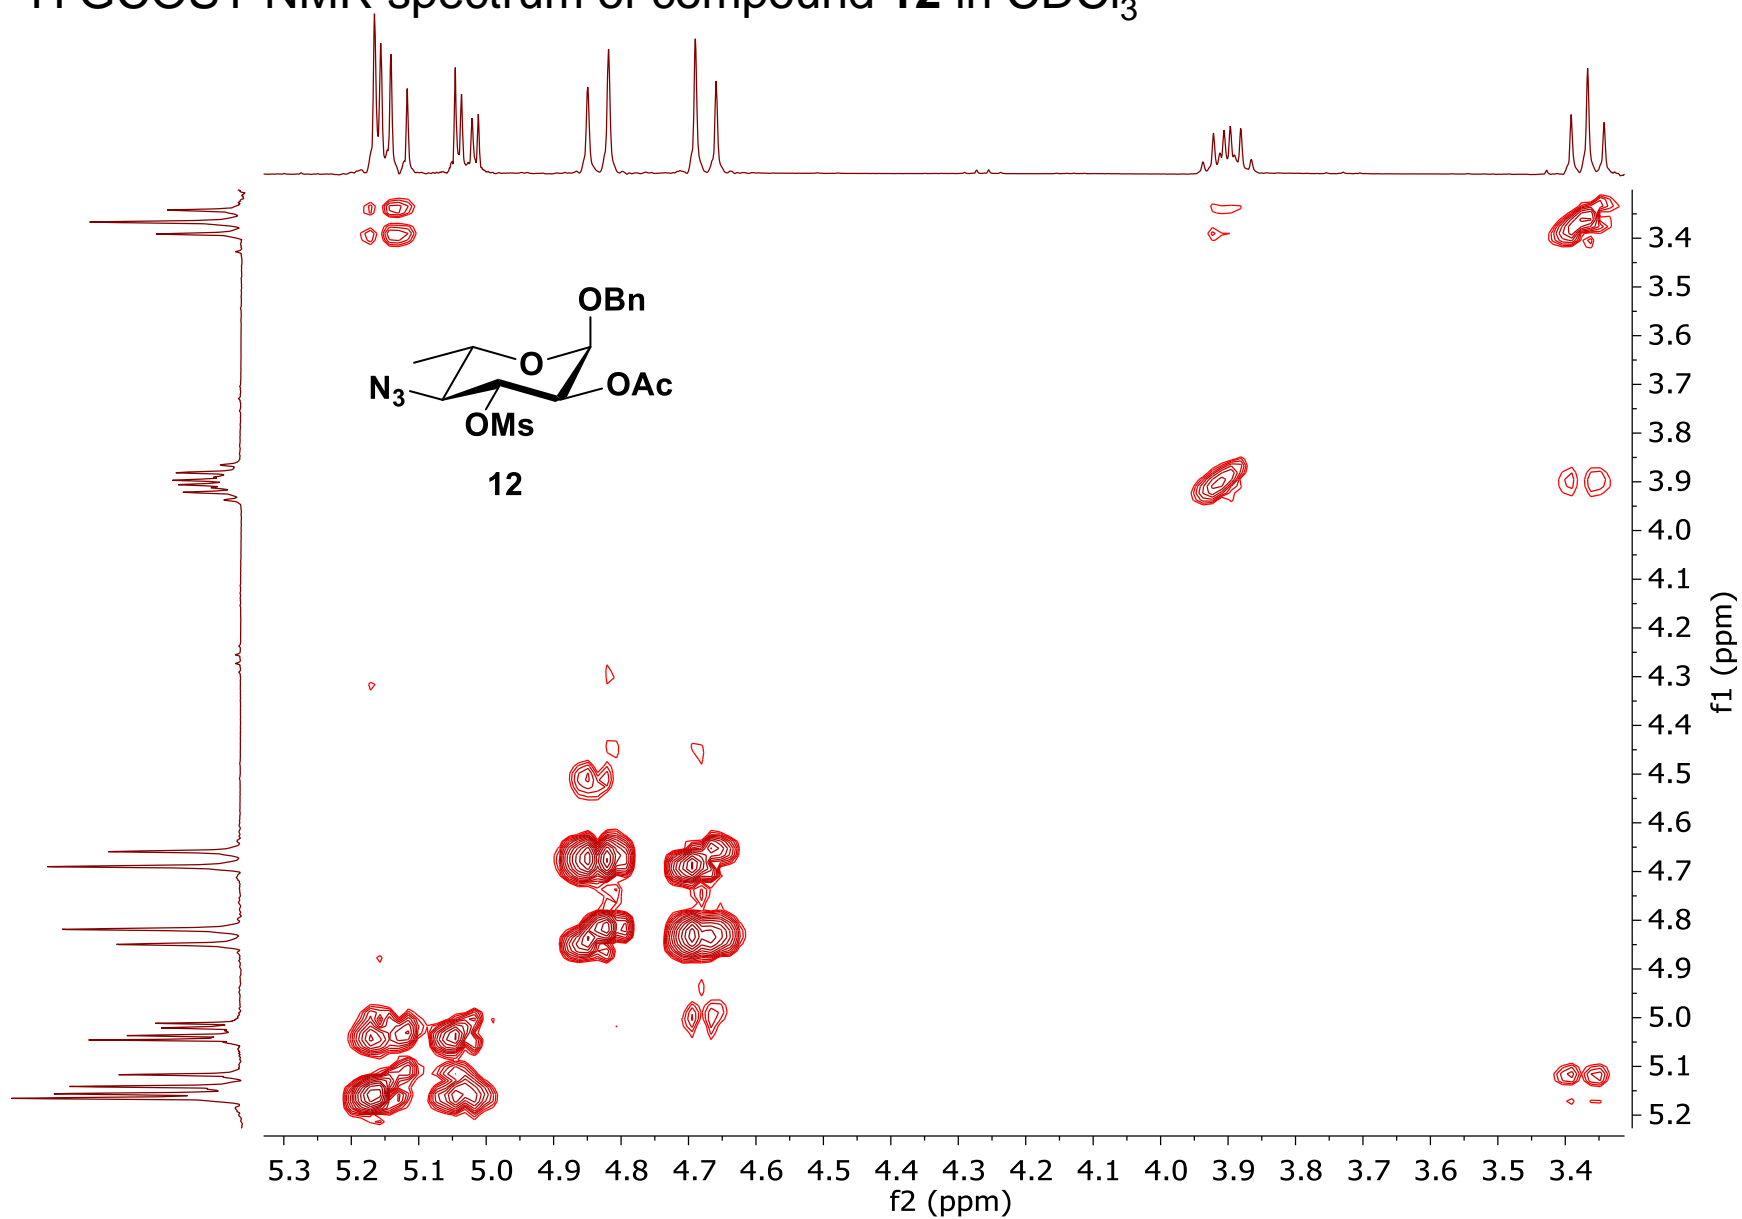

$^1\text{H}$ - $^{13}\text{C}$  GHSQC NMR spectrum of compound **12** in  $\text{CDCl}_3$

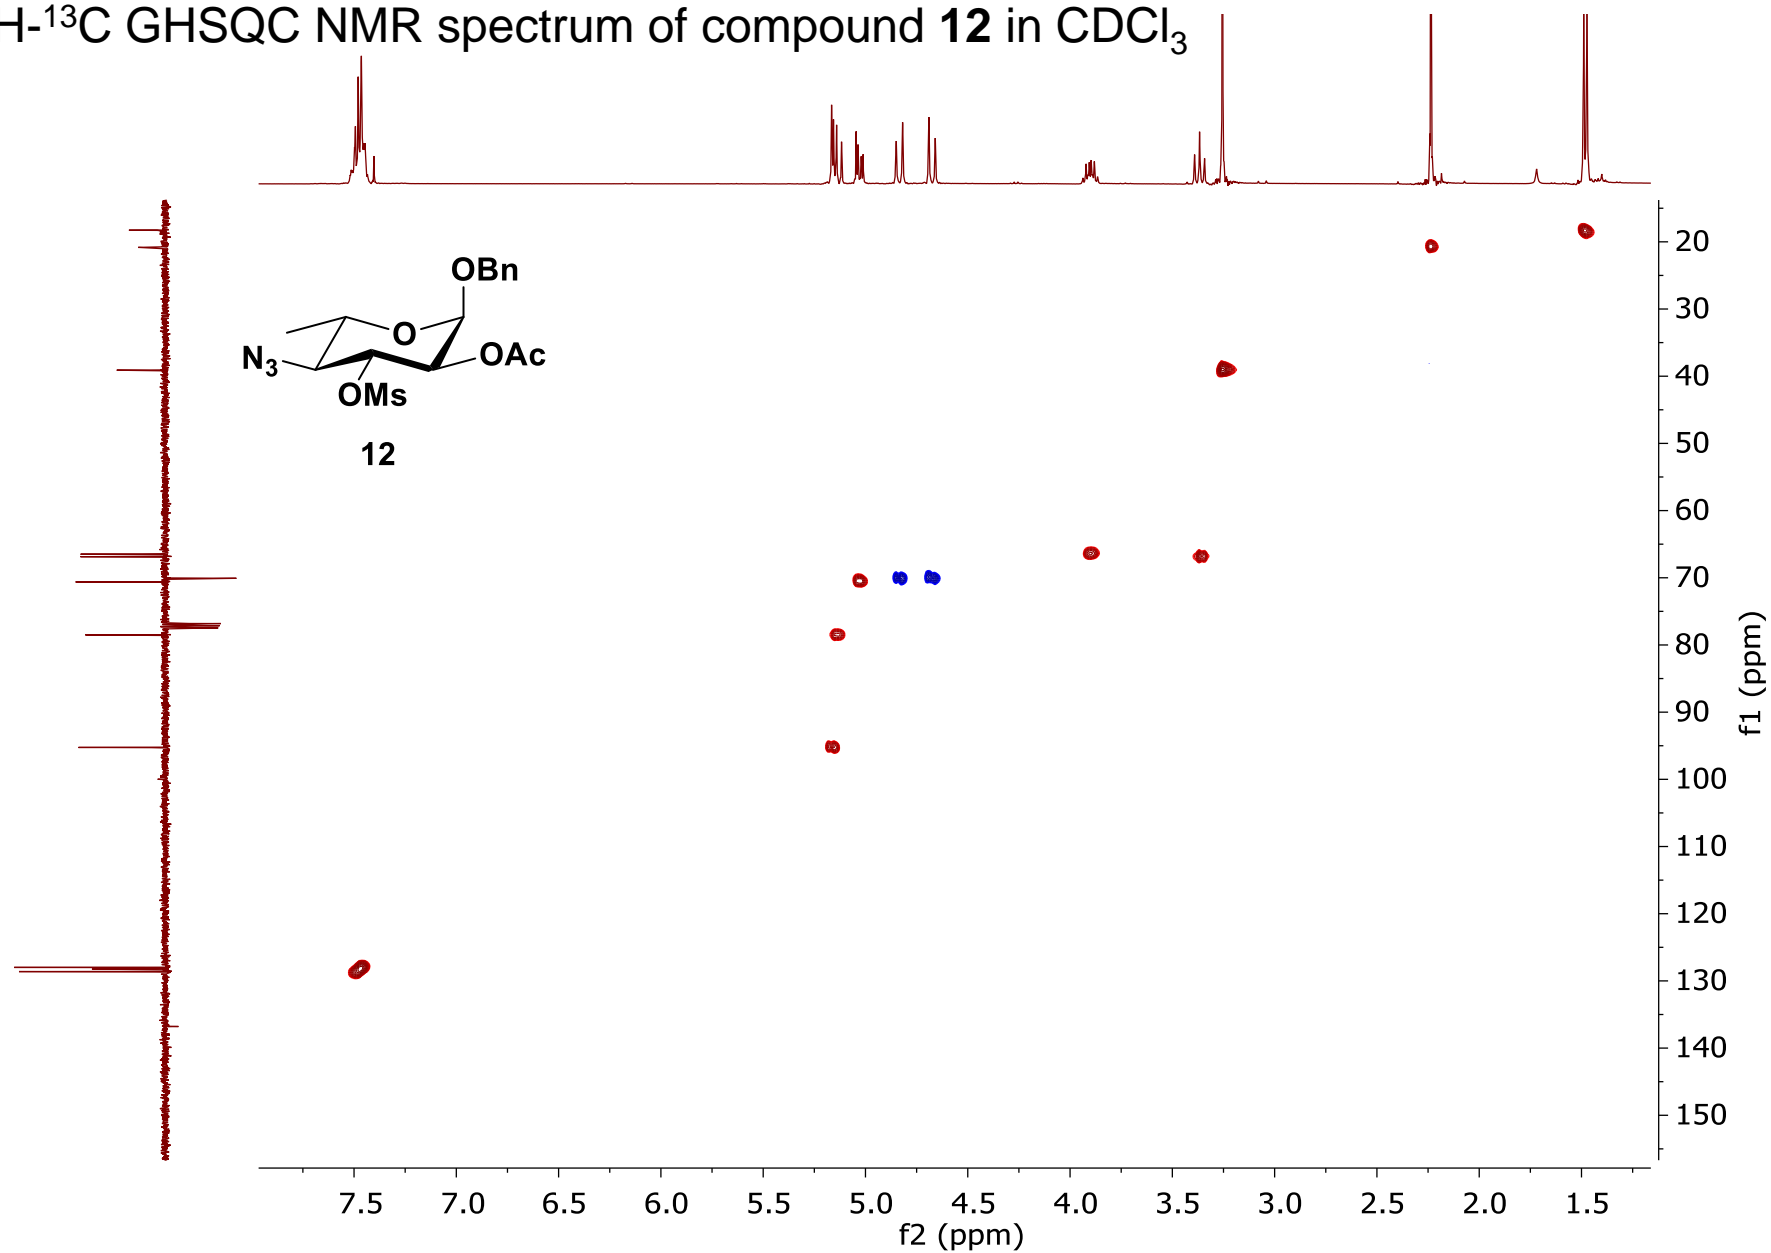

$^1\text{H}$  NMR spectrum of compound **16** in  $\text{CDCl}_3$  (400 MHz)

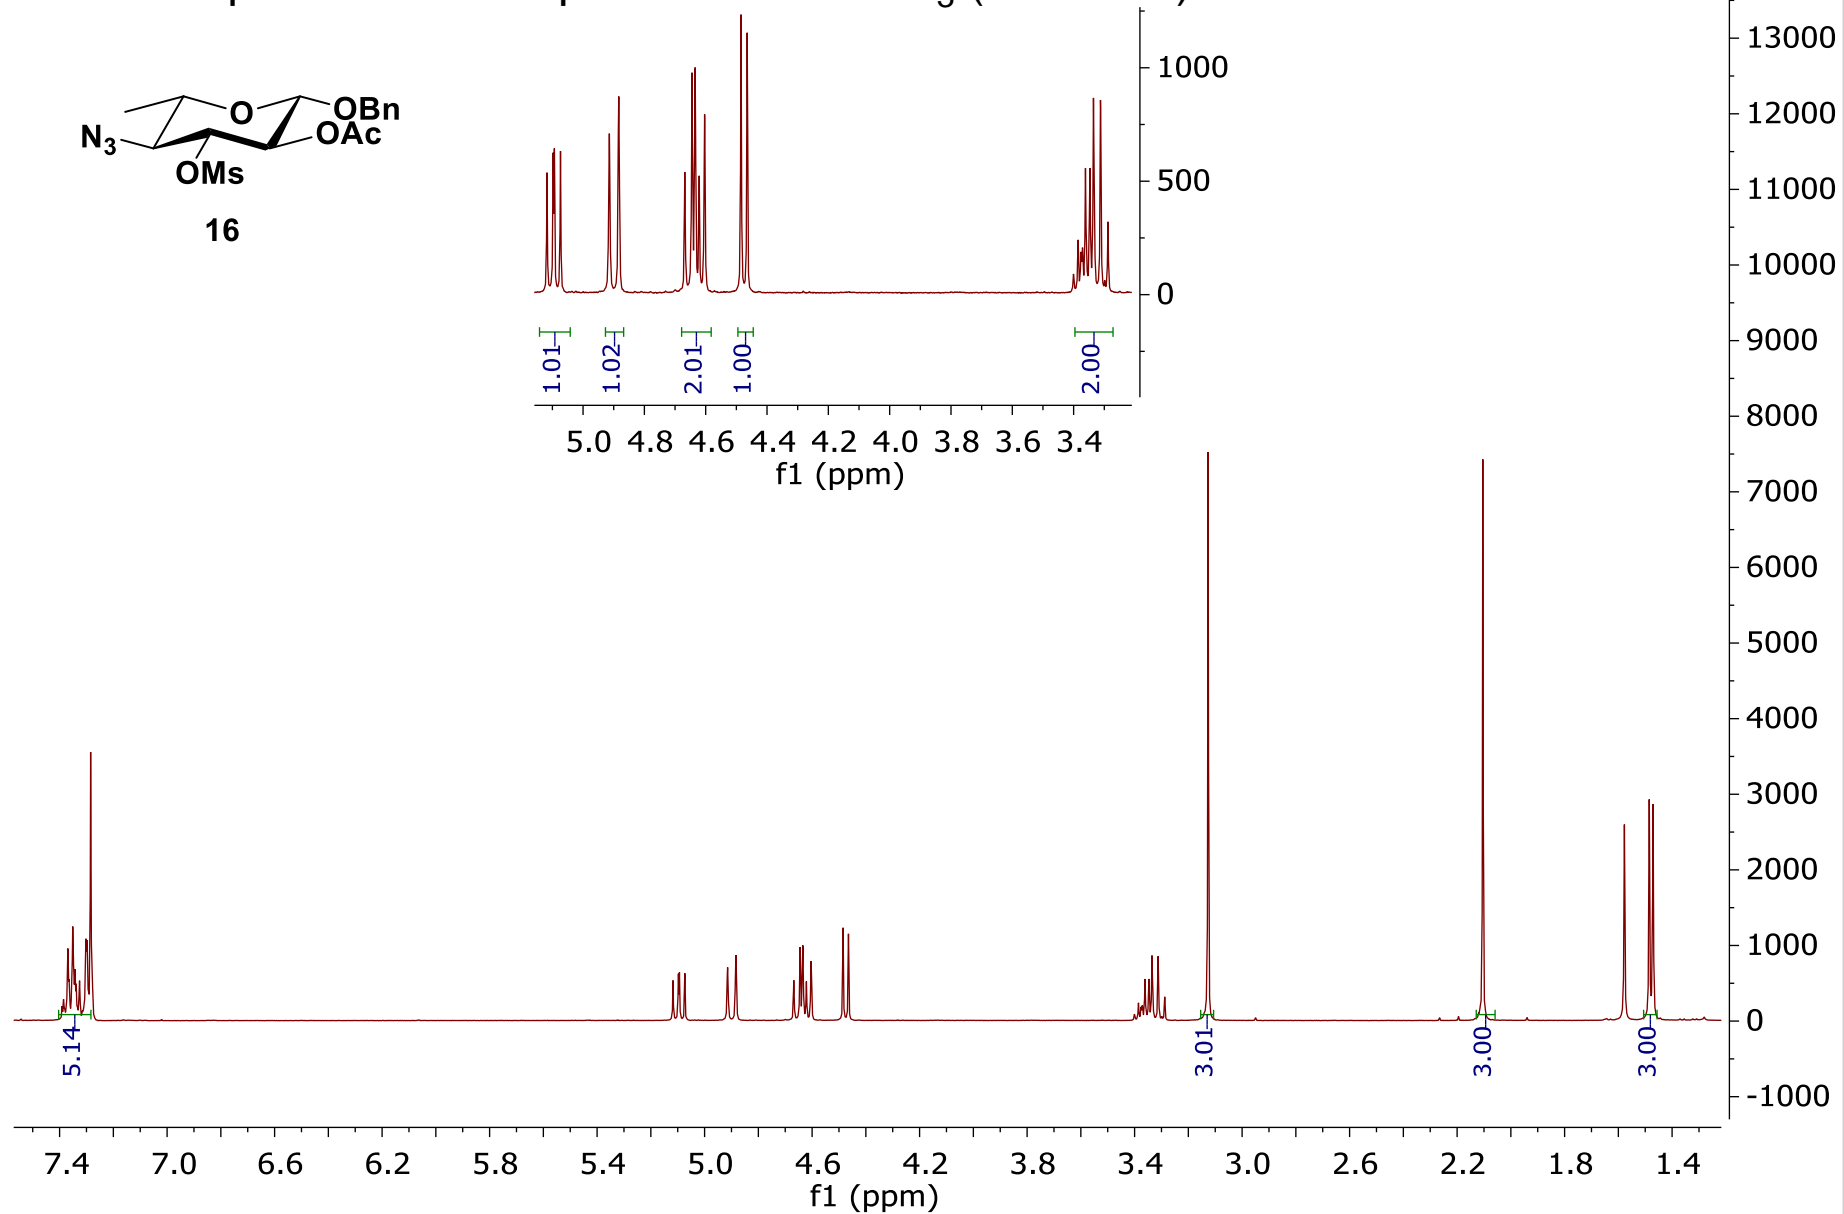

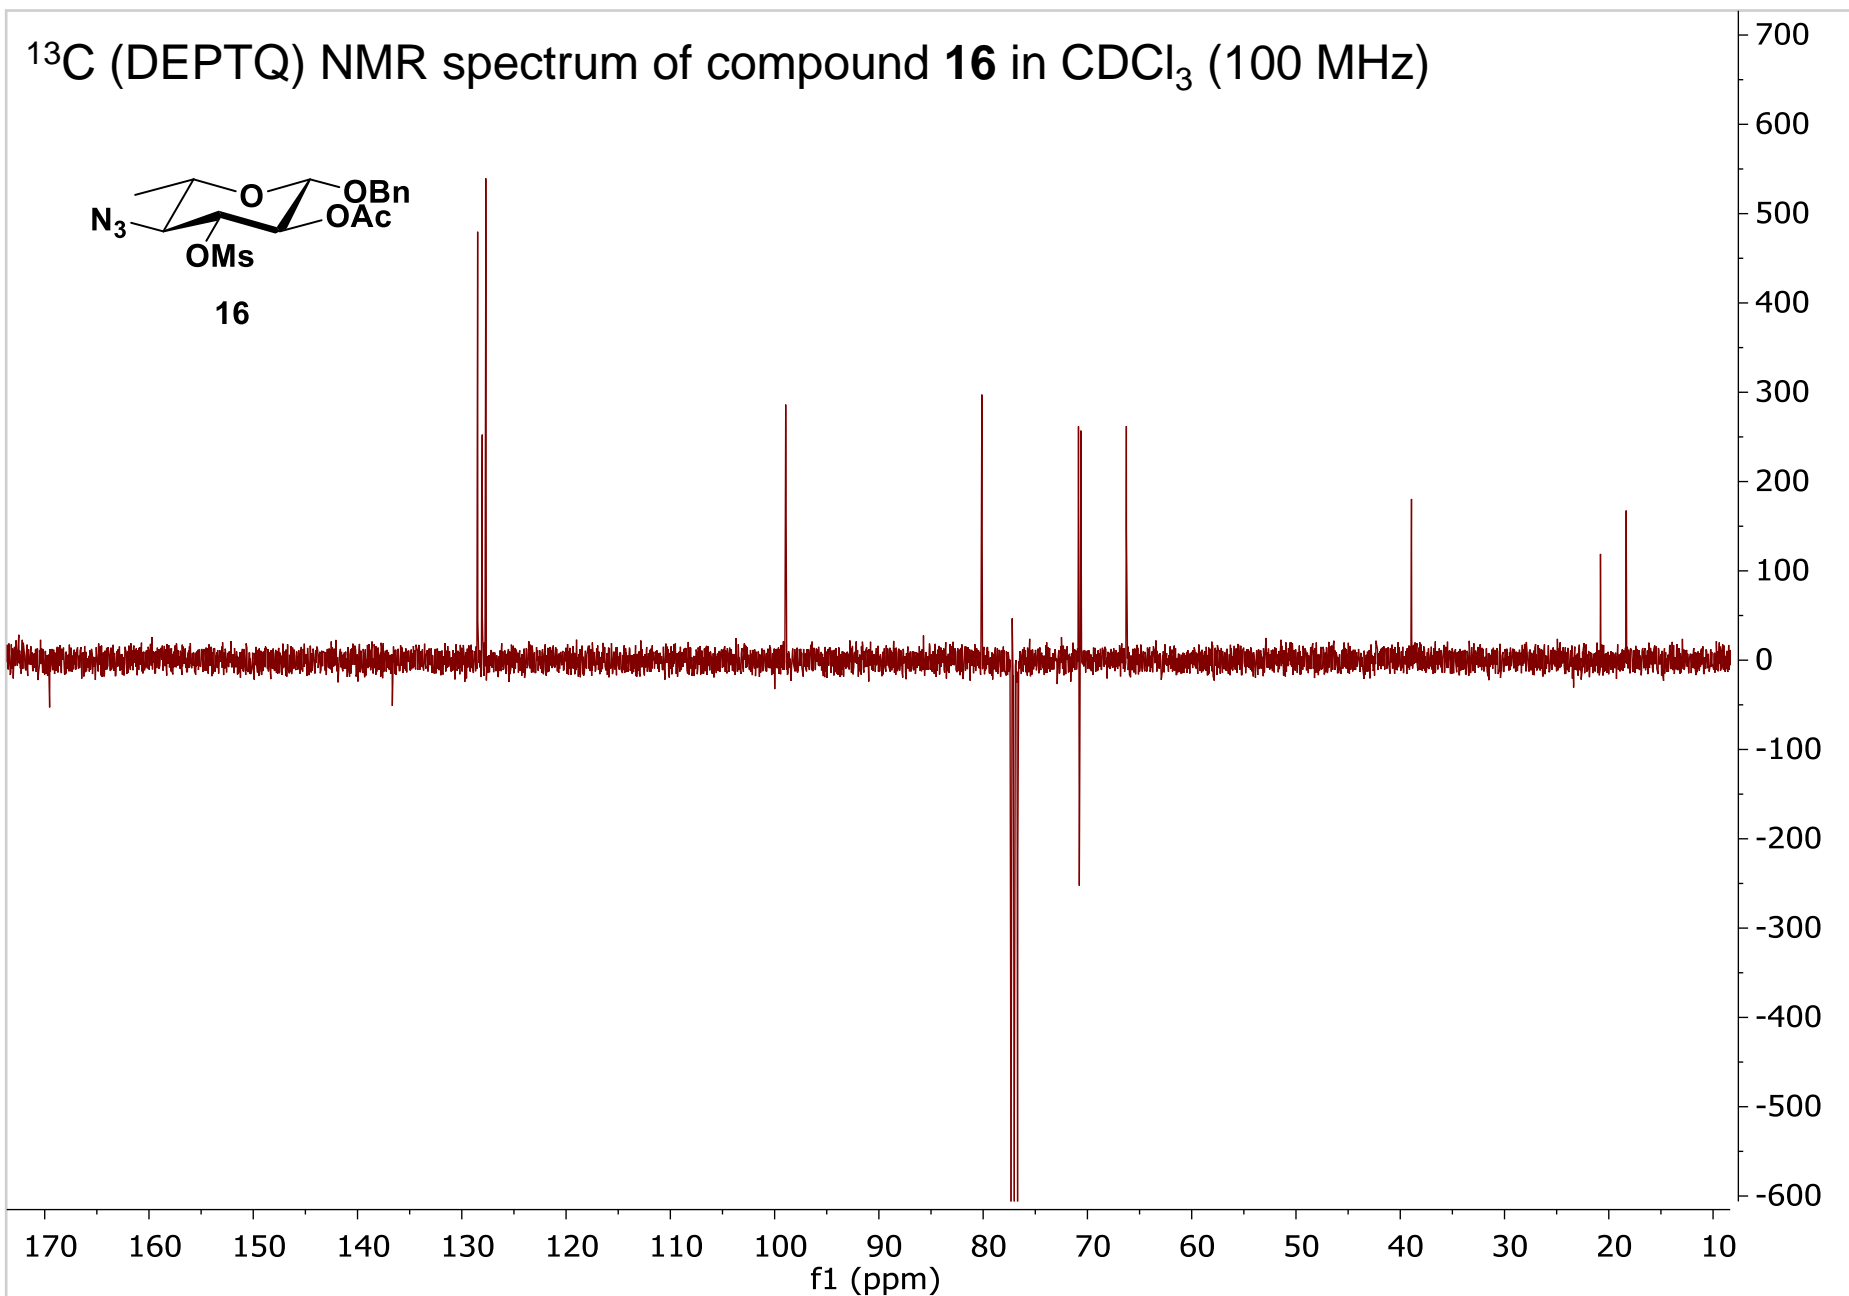



$^1\text{H}$ - $^1\text{H}$  GCOSY NMR spectrum of compound **16** in  $\text{CDCl}_3$

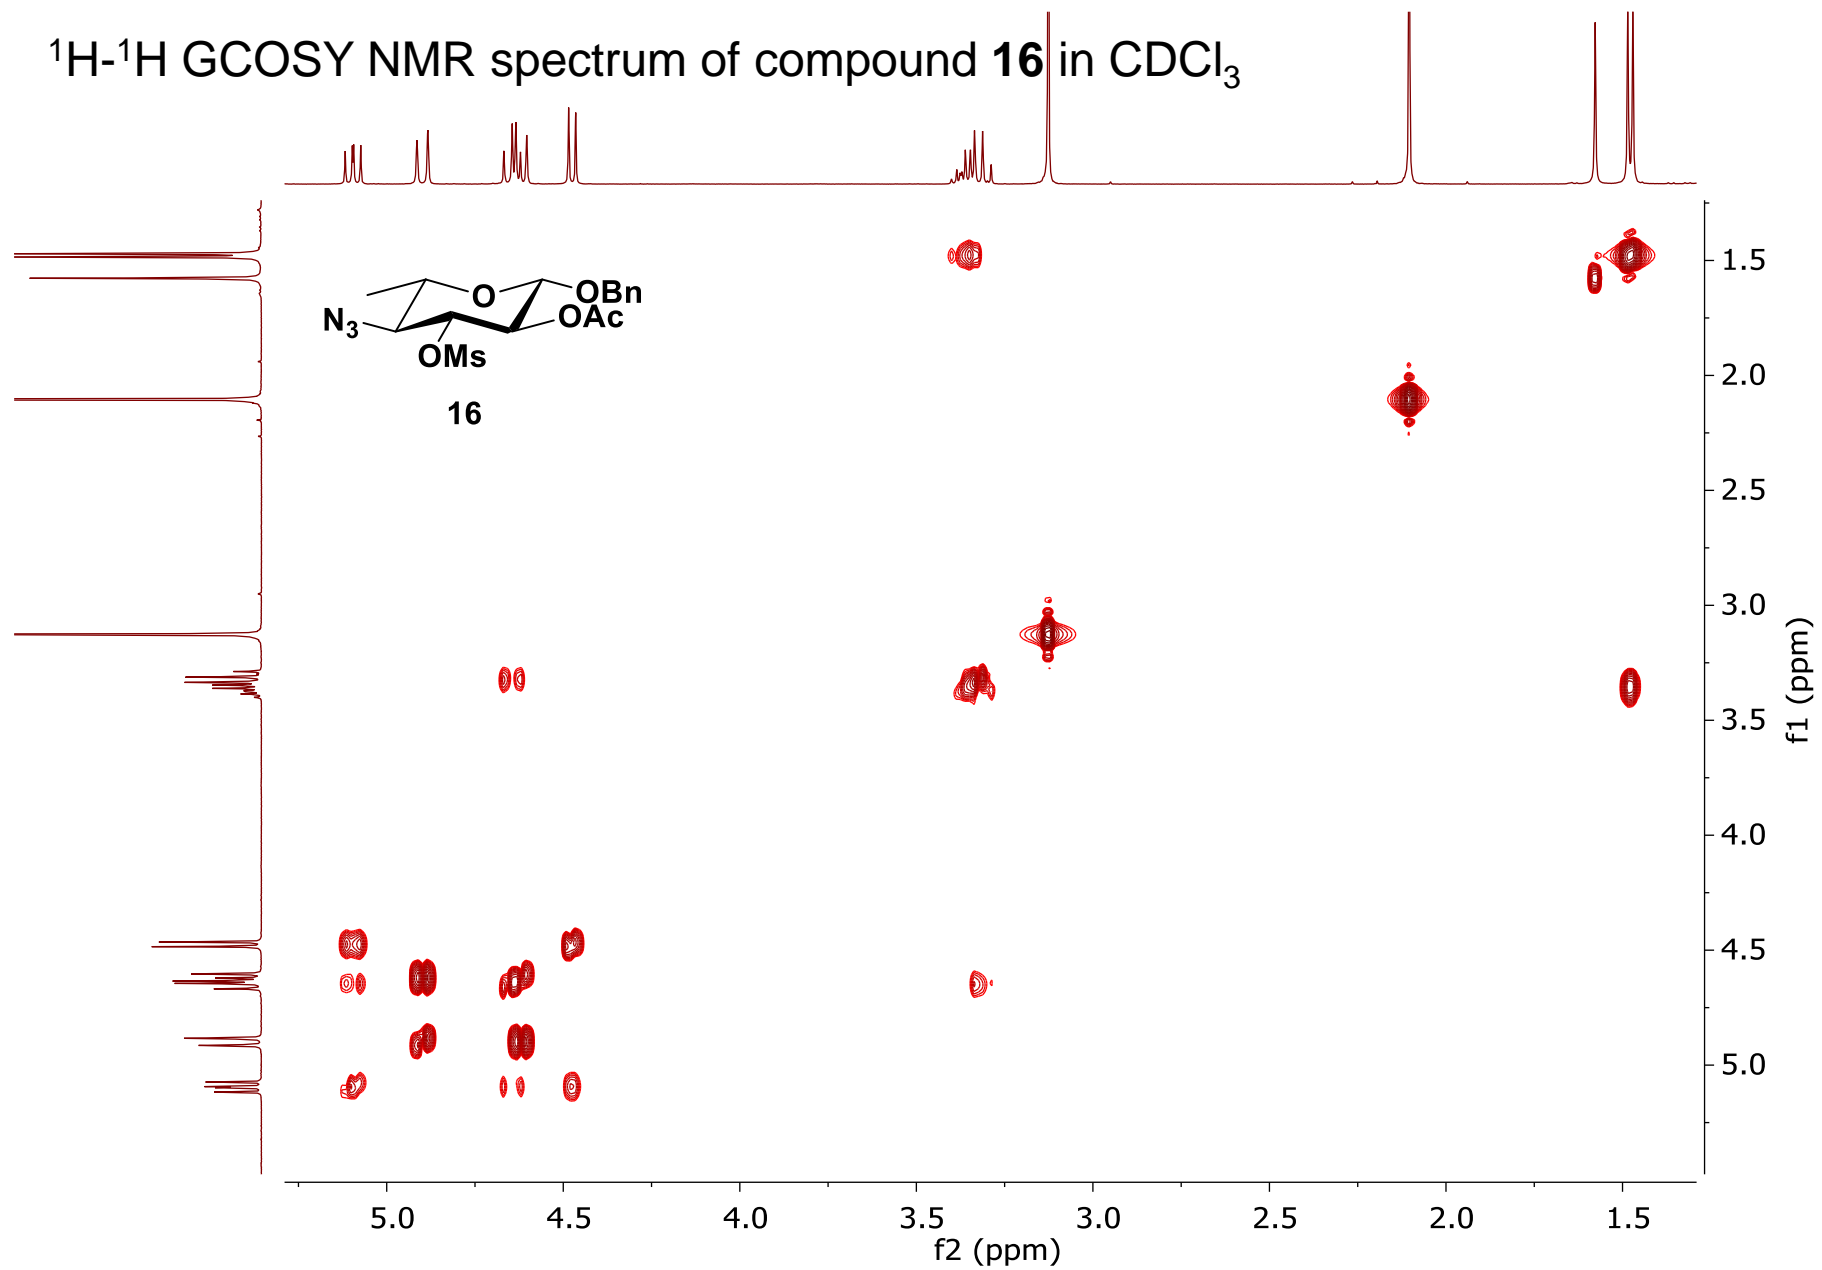

$^1\text{H}$ - $^{13}\text{C}$  GHSQC NMR spectrum of compound **16** in  $\text{CDCl}_3$

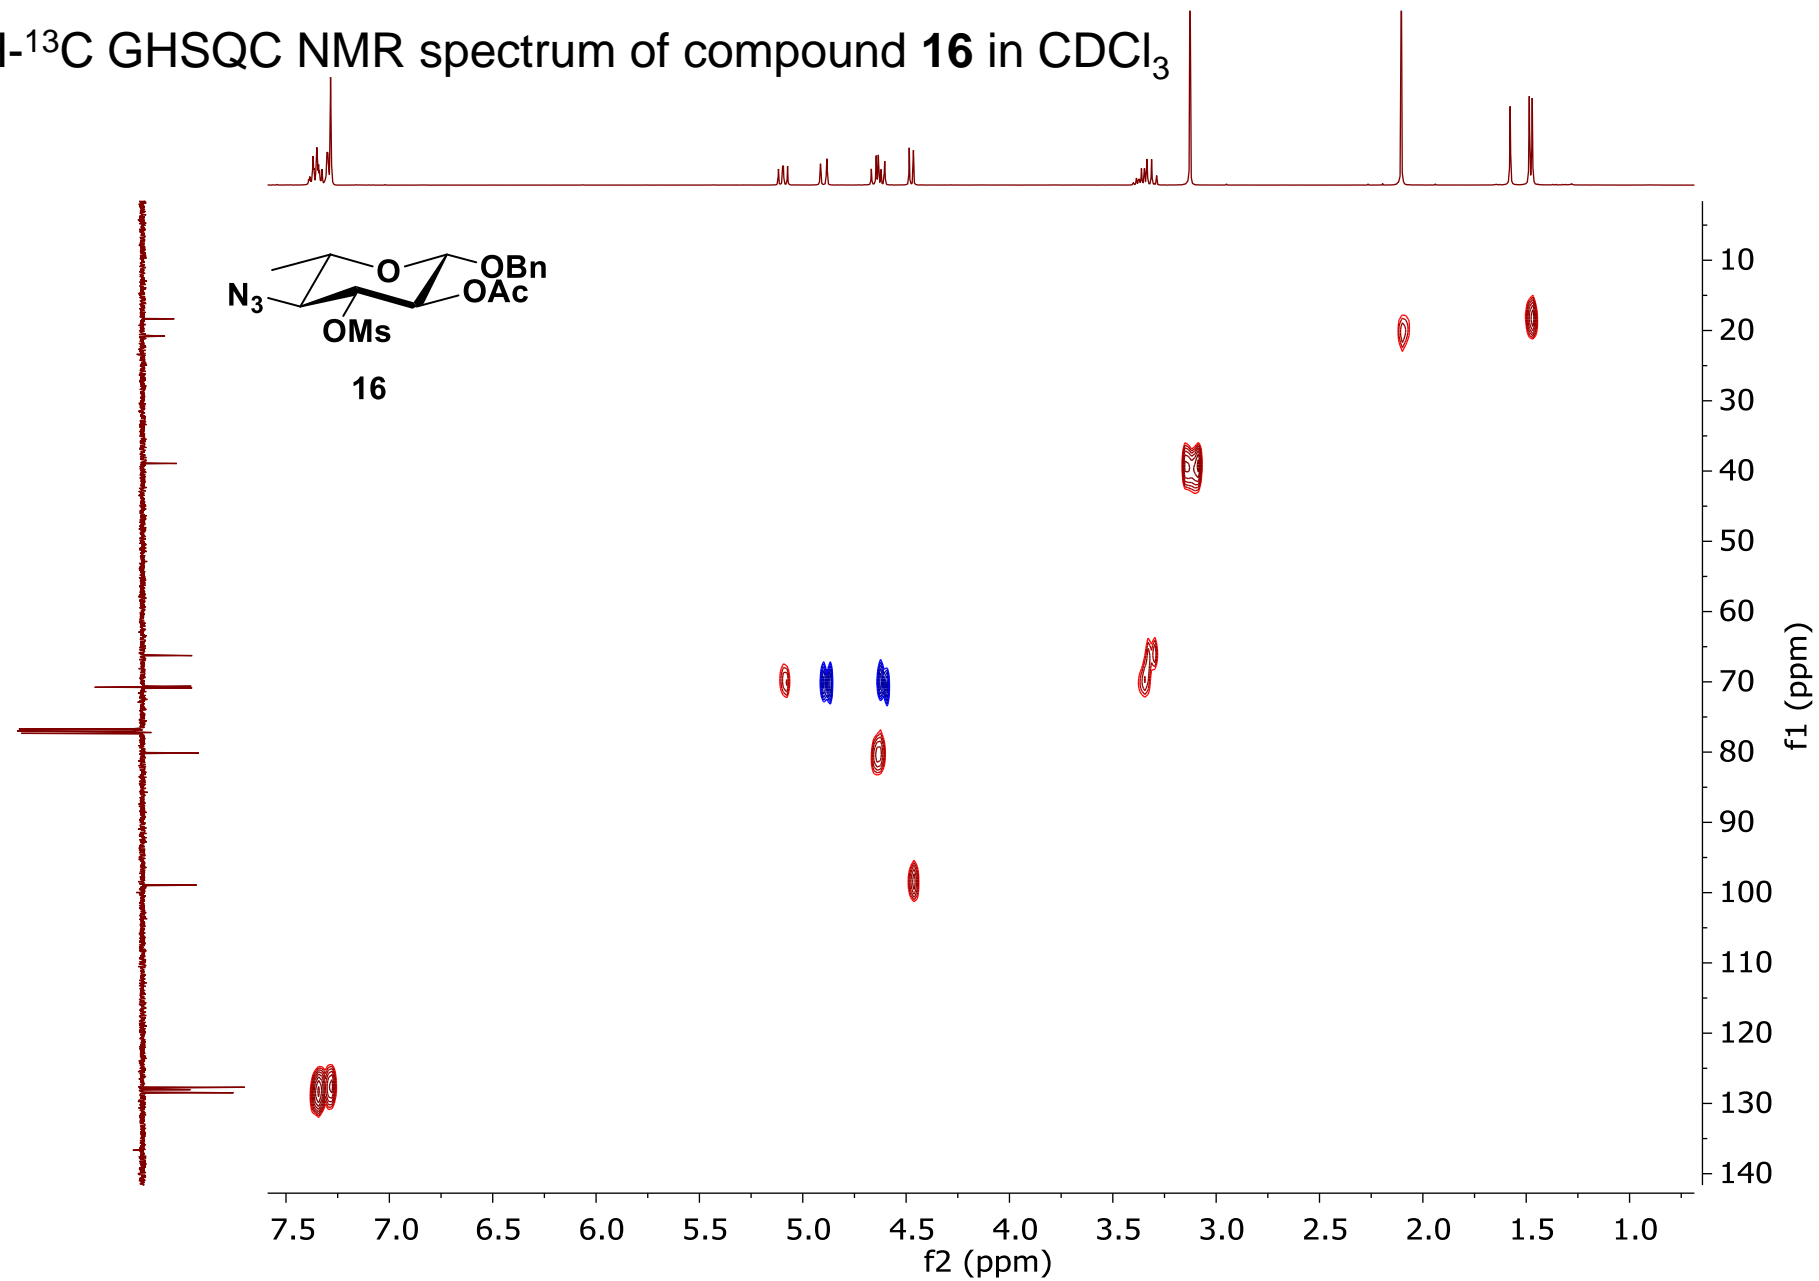

$^1\text{H}$  NMR spectrum of compound **17** in  $\text{CDCl}_3$  (400 MHz)

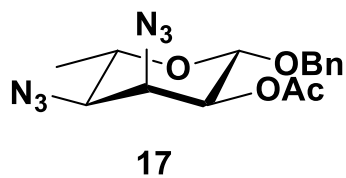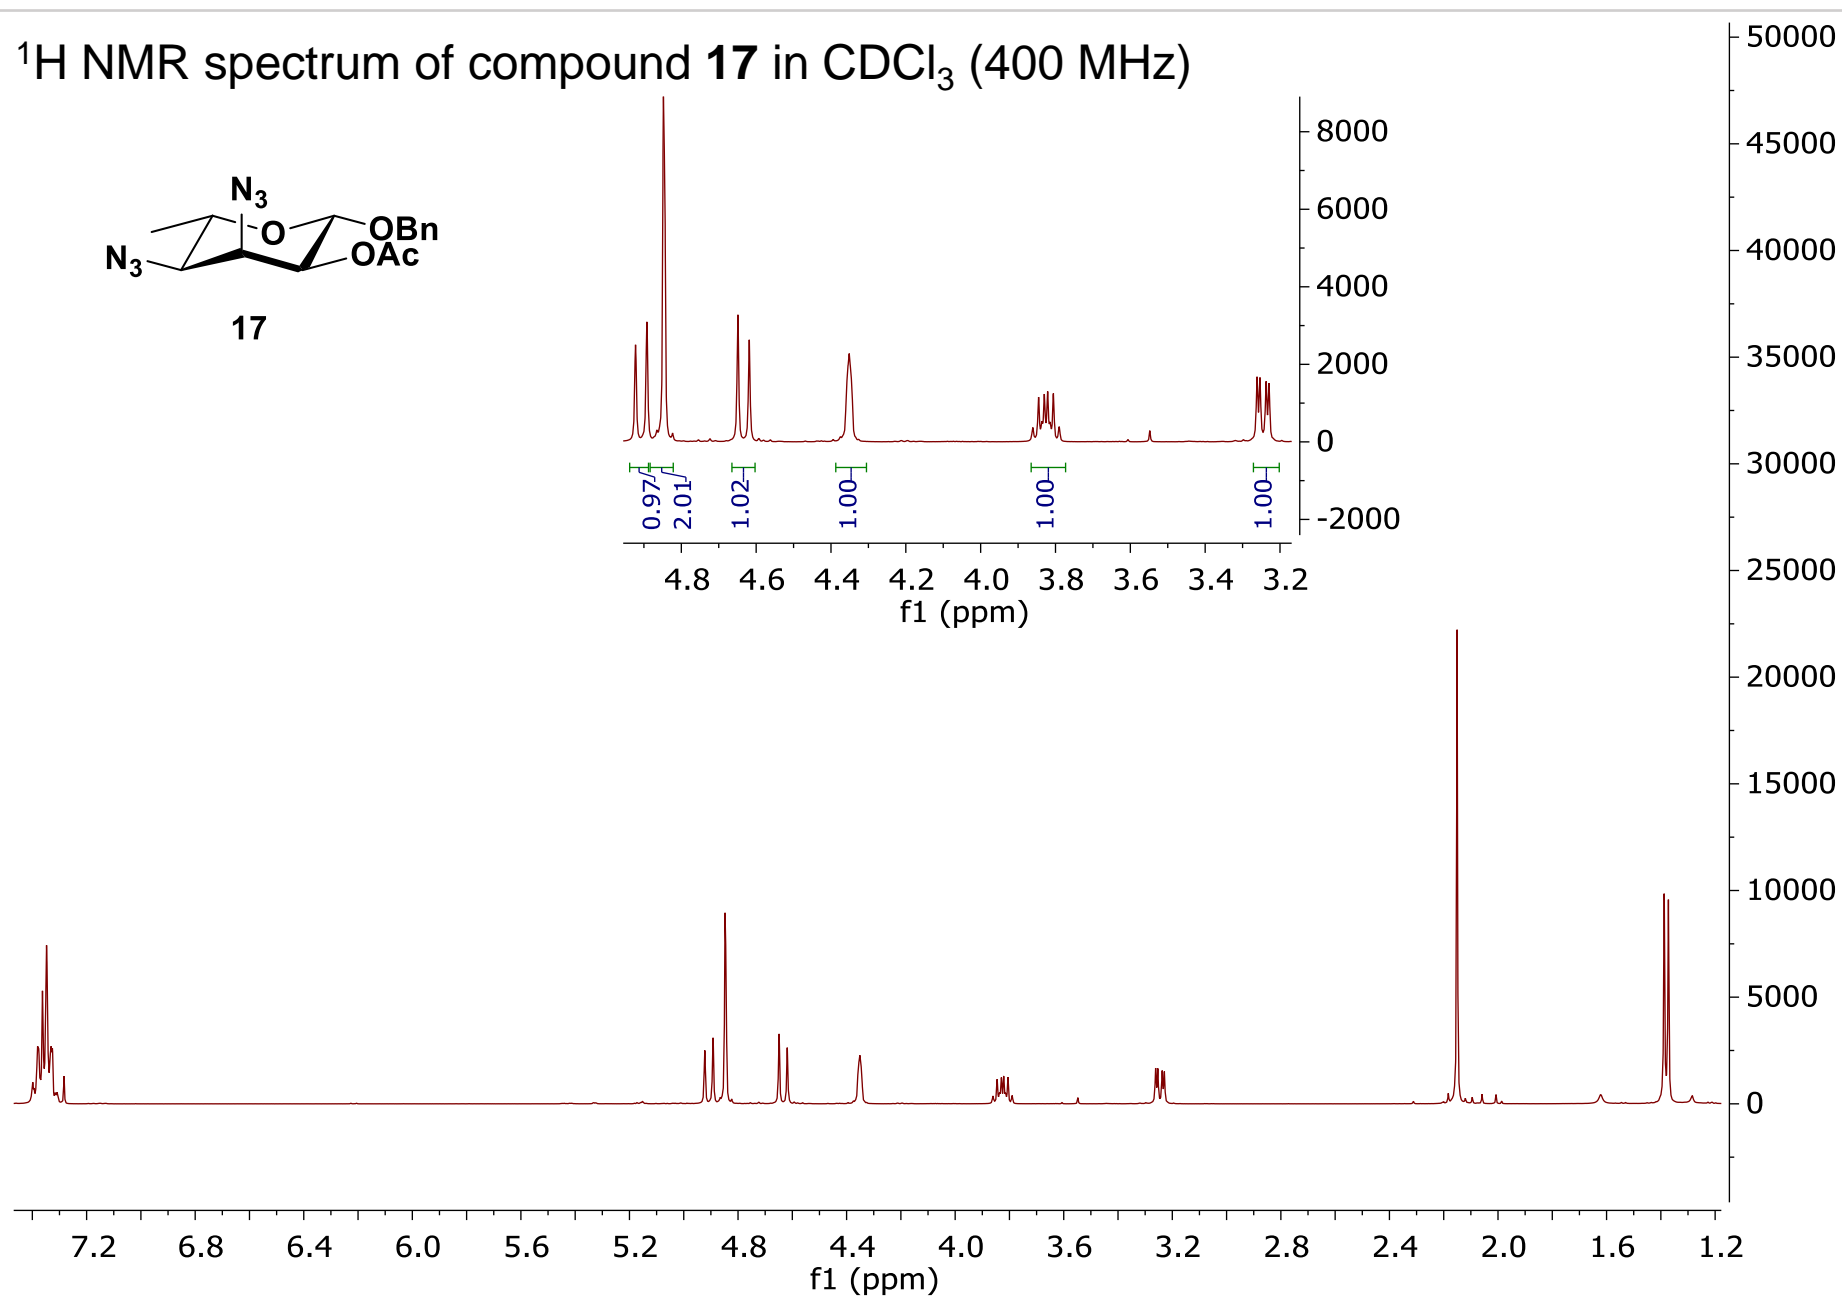

$^{13}\text{C}$  (DEPTQ) NMR spectrum of compound **17** in  $\text{CDCl}_3$  (100 MHz)

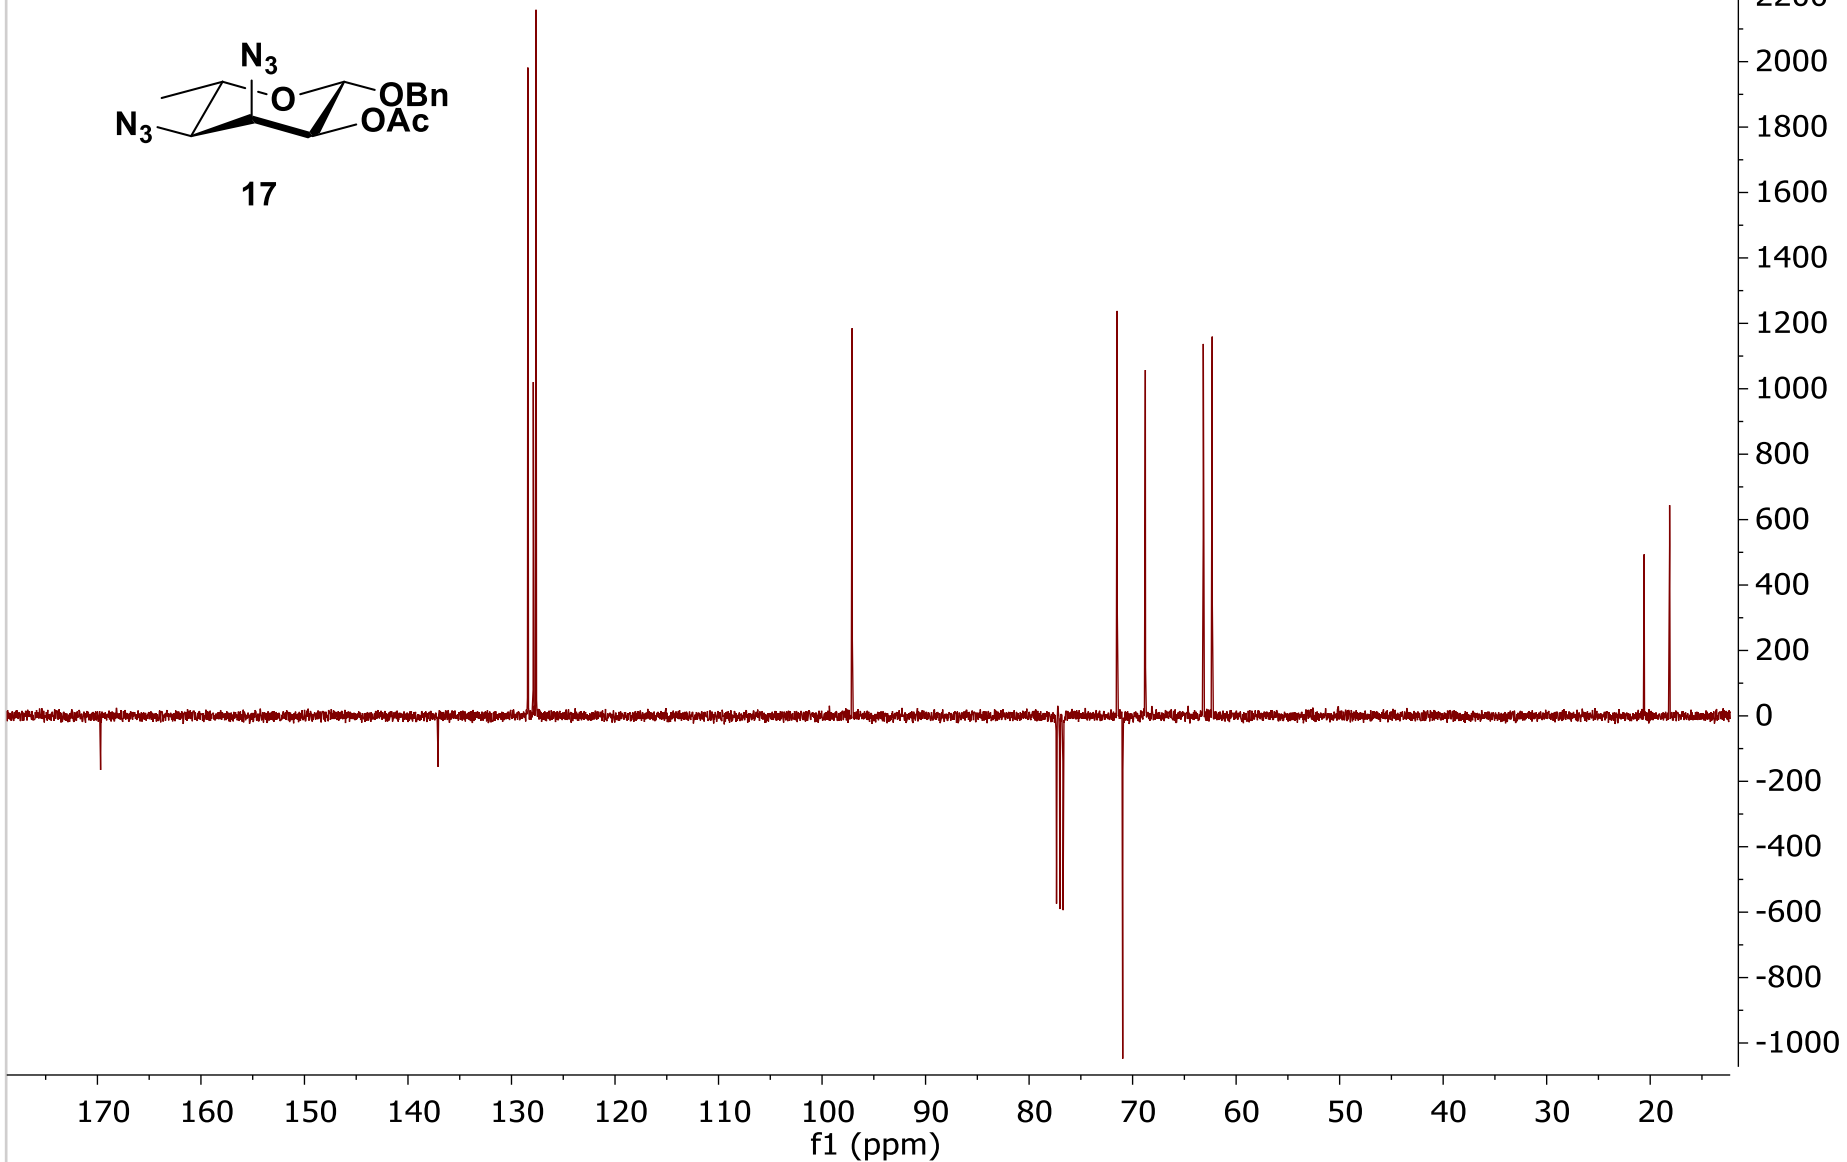

$^1\text{H}$ - $^1\text{H}$  GCOSY NMR spectrum of compound **17** in  $\text{CDCl}_3$

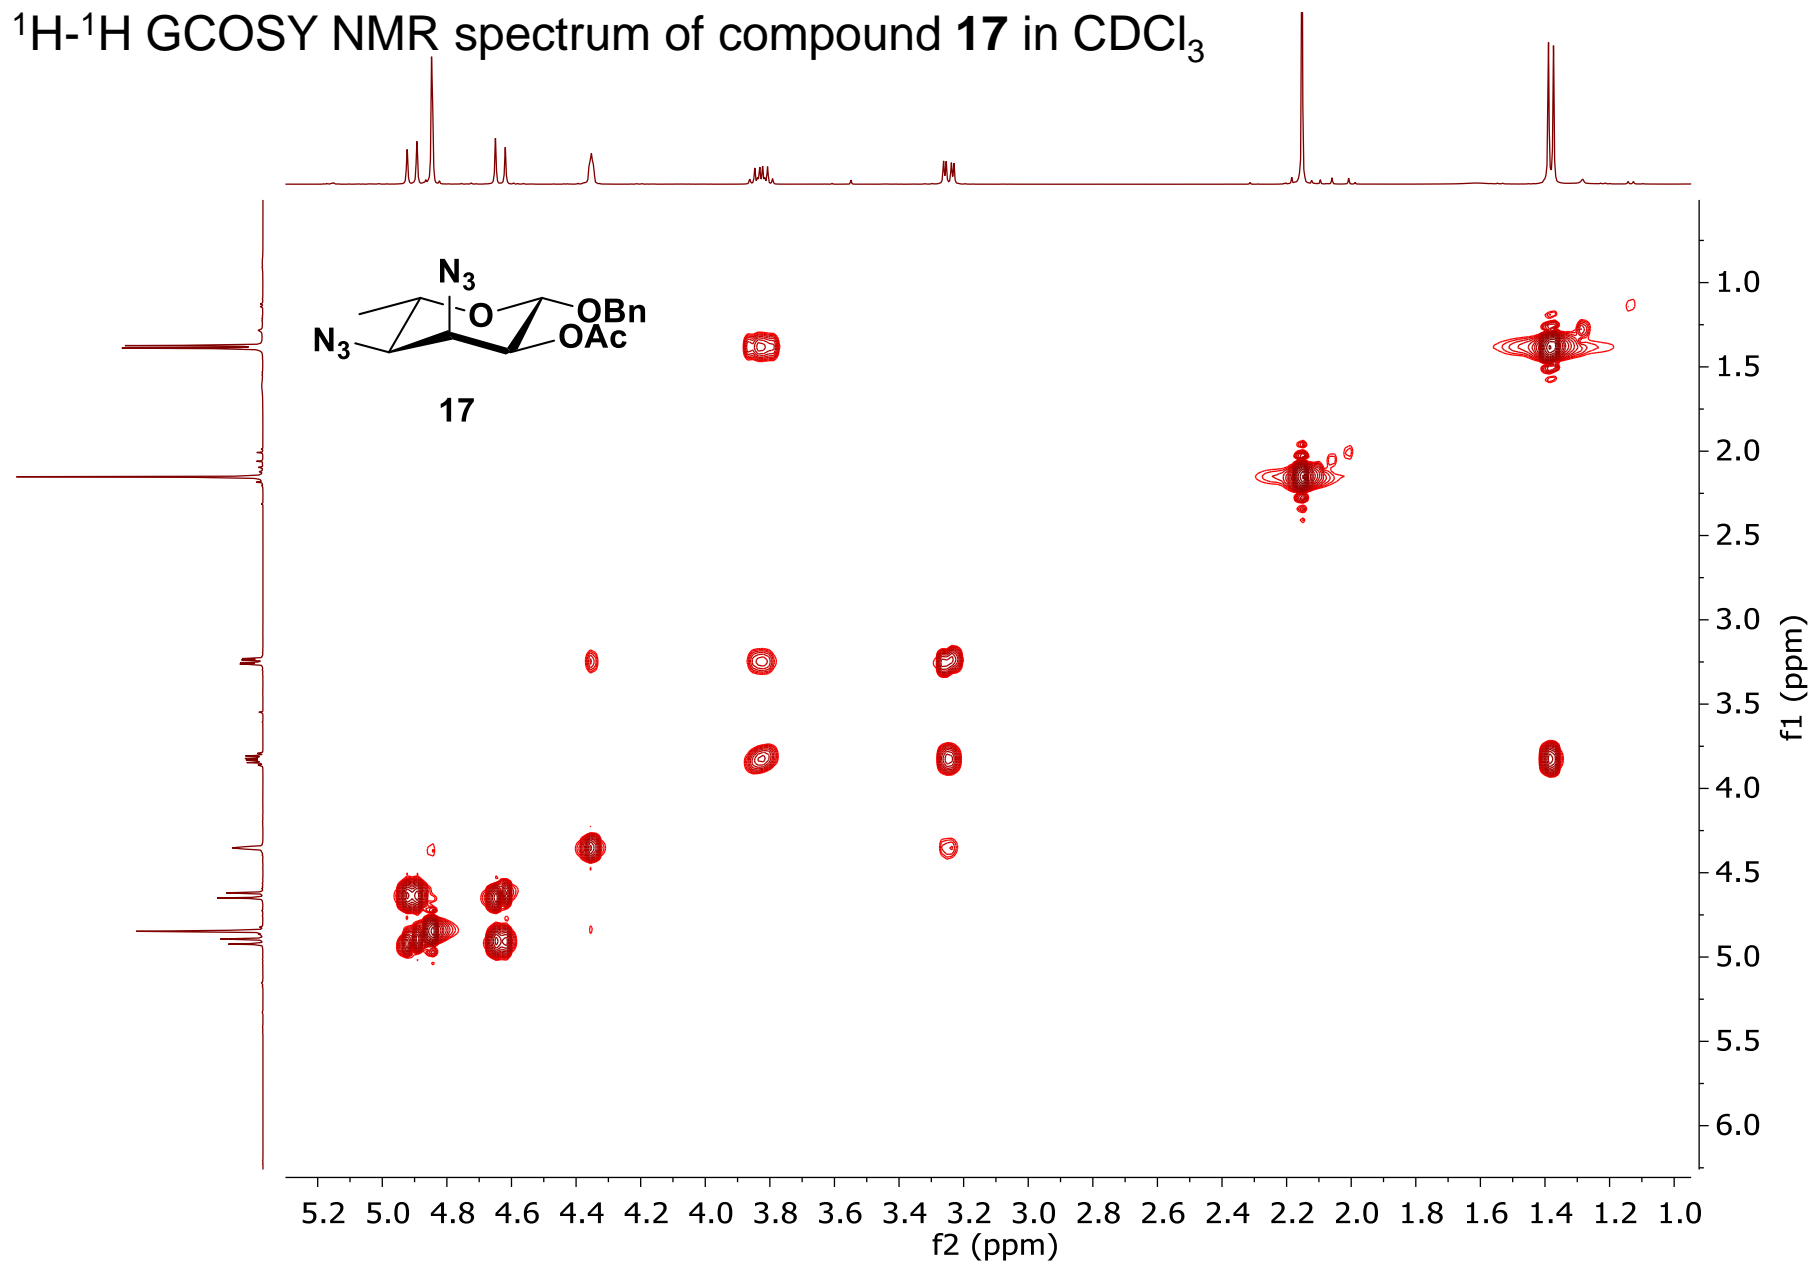

$^1\text{H}$ - $^{13}\text{C}$  GHSQC NMR spectrum of compound **17** in  $\text{CDCl}_3$

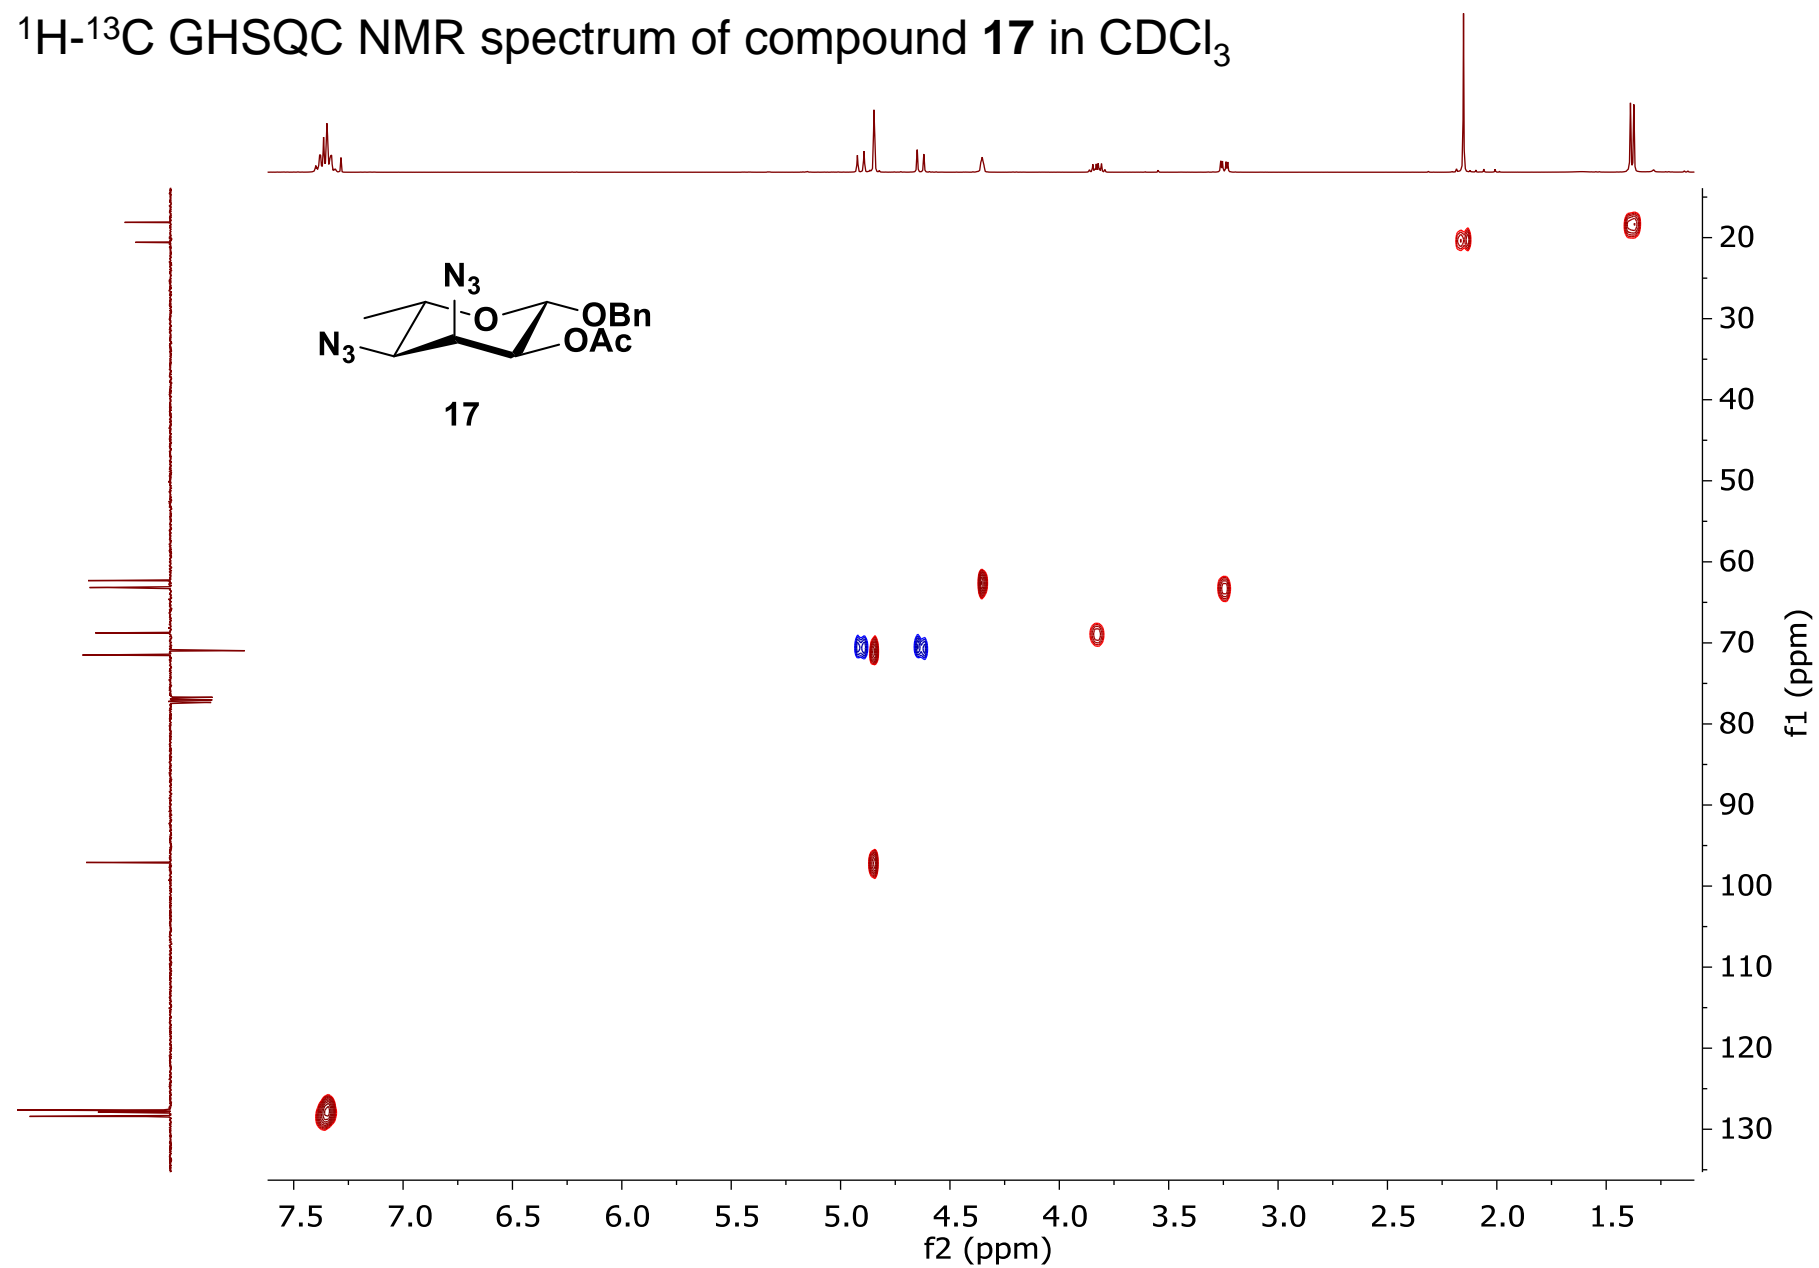

$^1\text{H}$  NMR spectrum of compound **20** in  $\text{CDCl}_3$  (400 MHz)

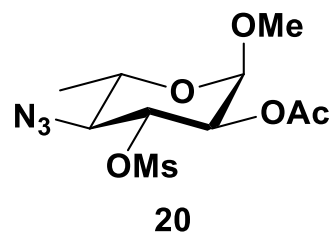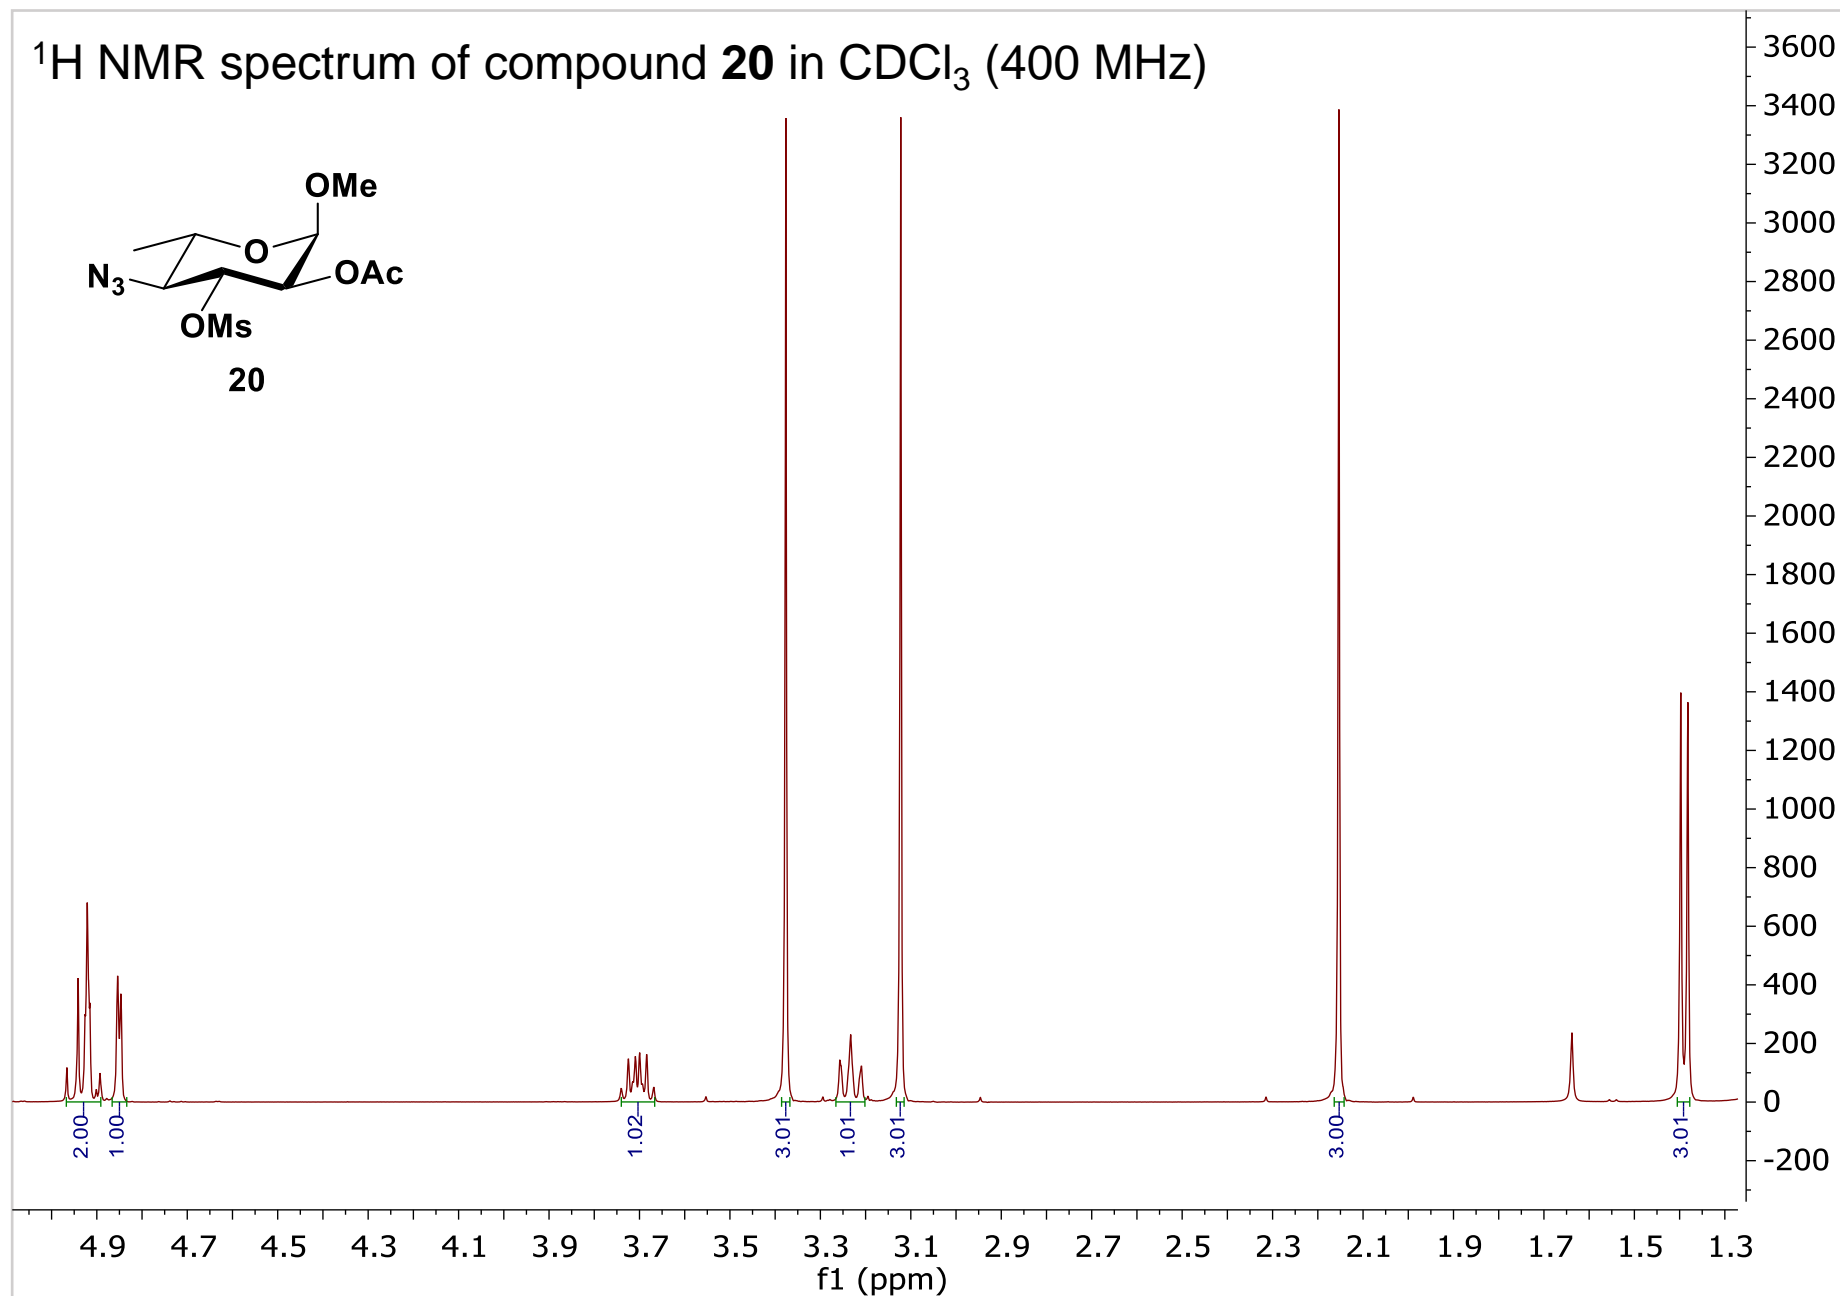

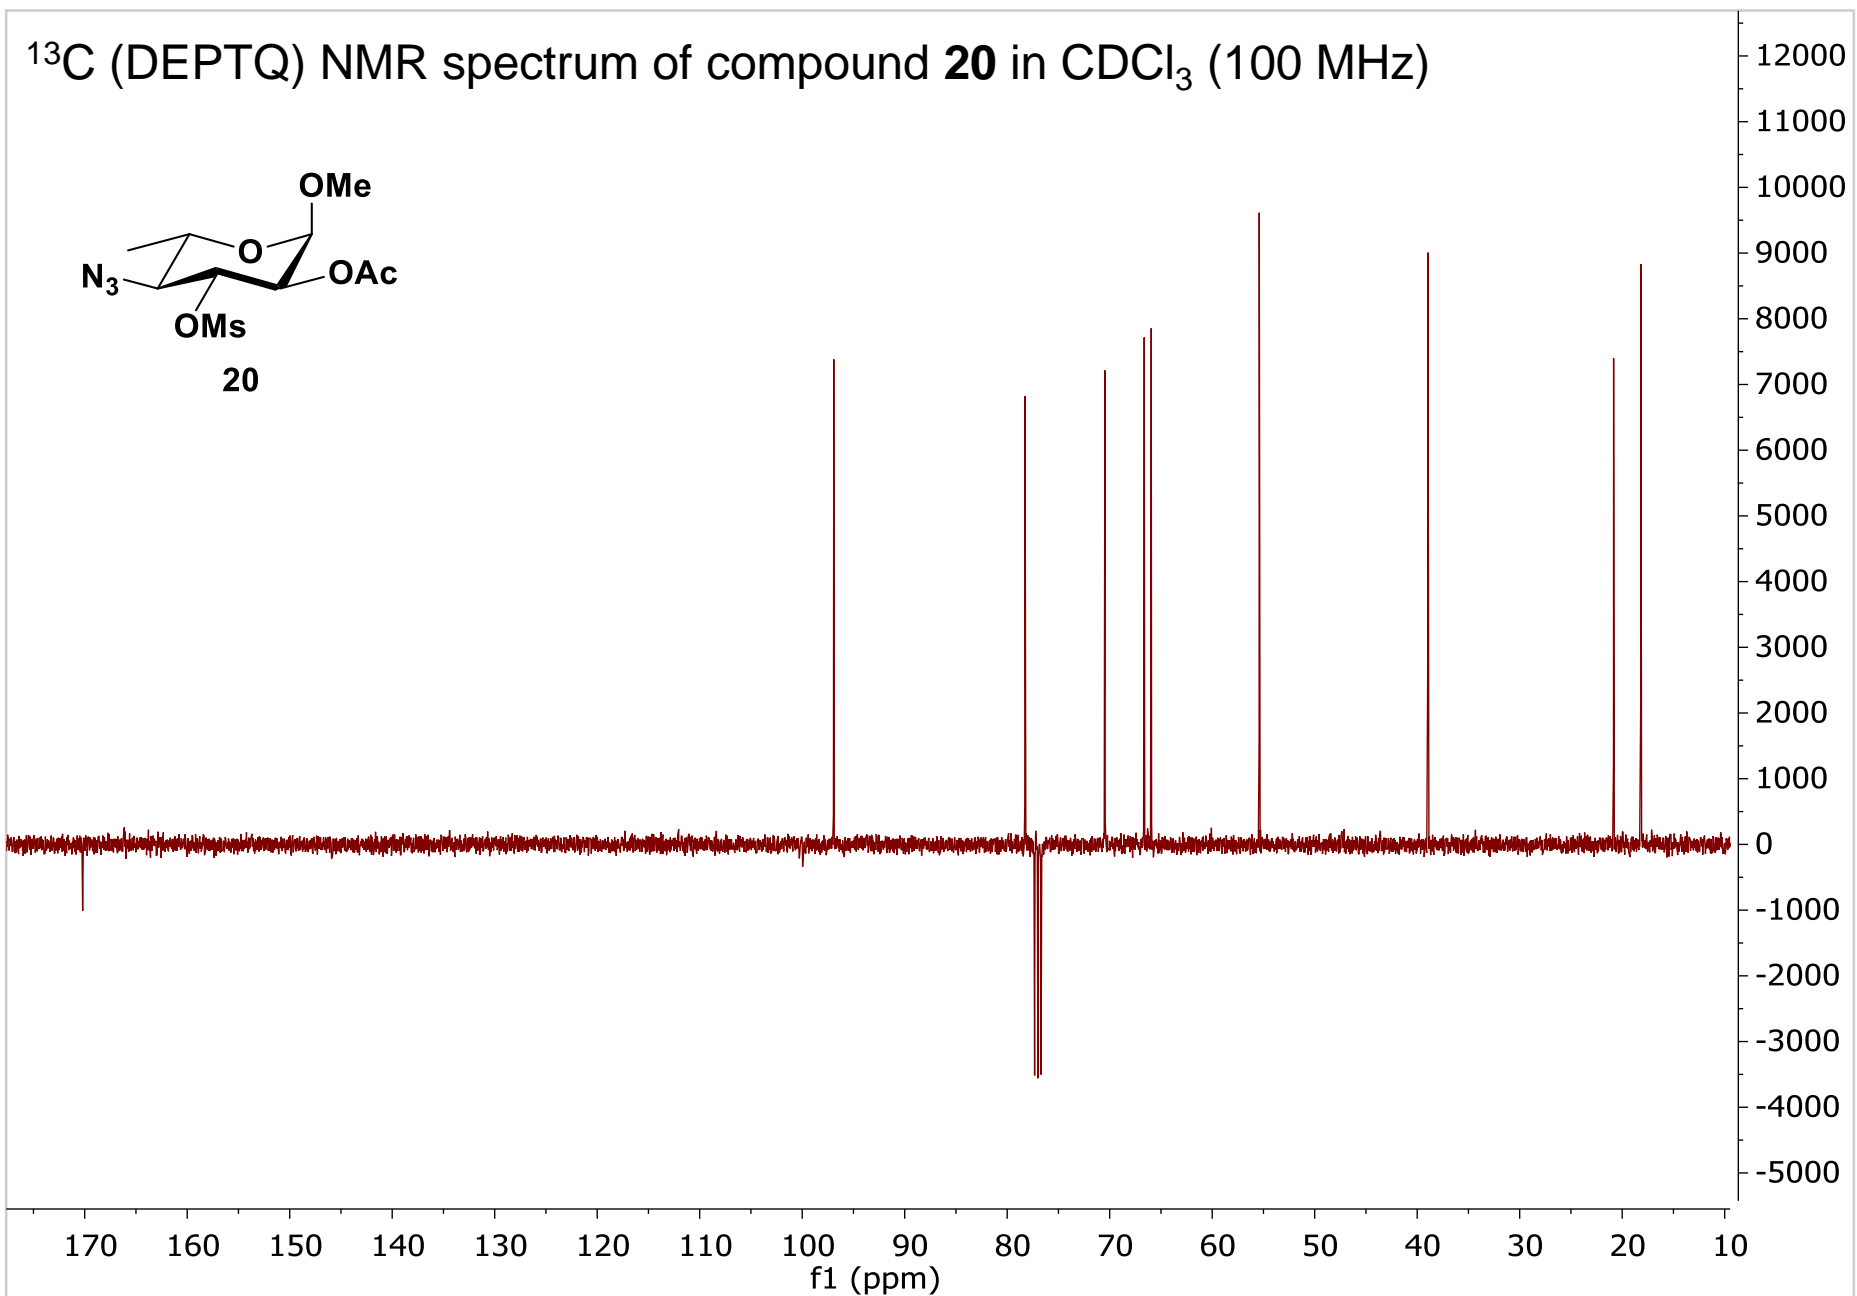



$^1\text{H}$ - $^1\text{H}$  GCOSY NMR spectrum of compound **20** in  $\text{CDCl}_3$

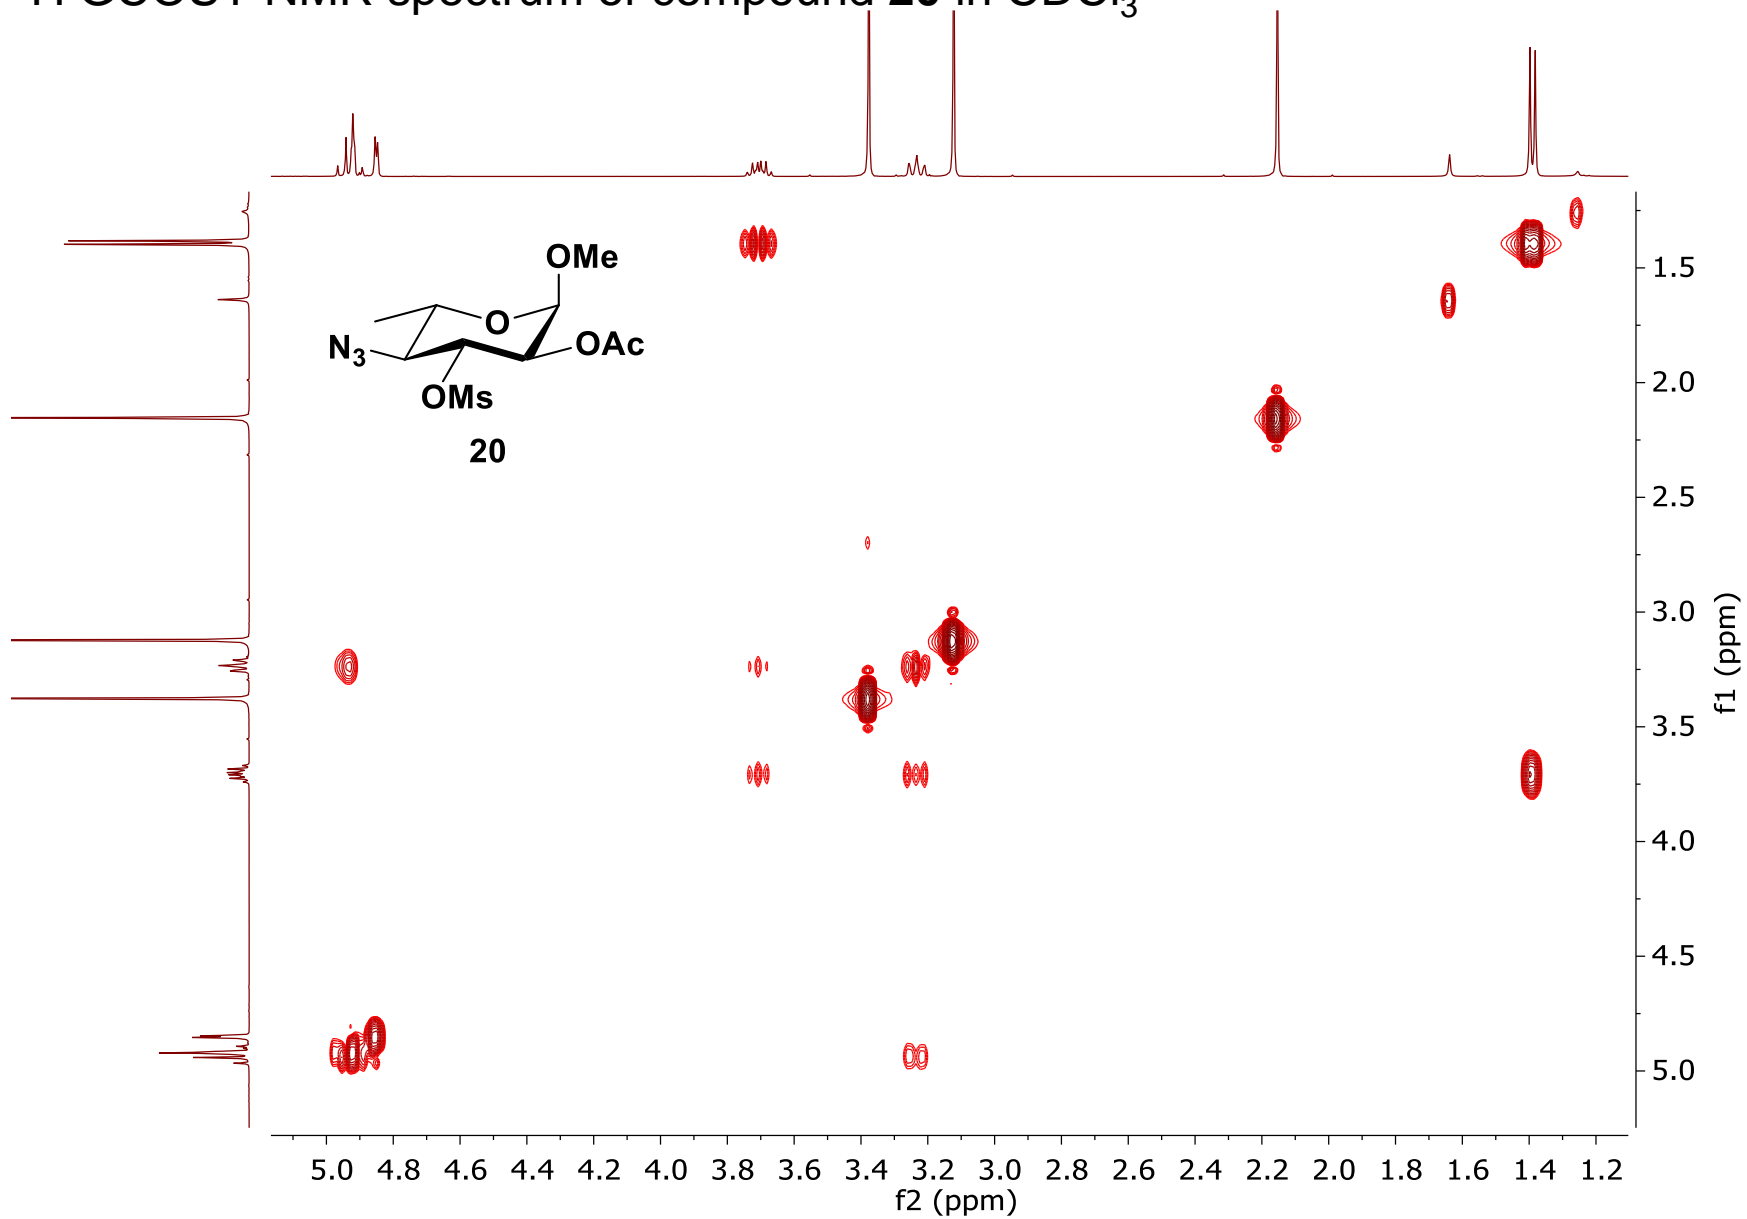

$^1\text{H}$ - $^{13}\text{C}$  GHSQC NMR spectrum of compound **20** in  $\text{CDCl}_3$

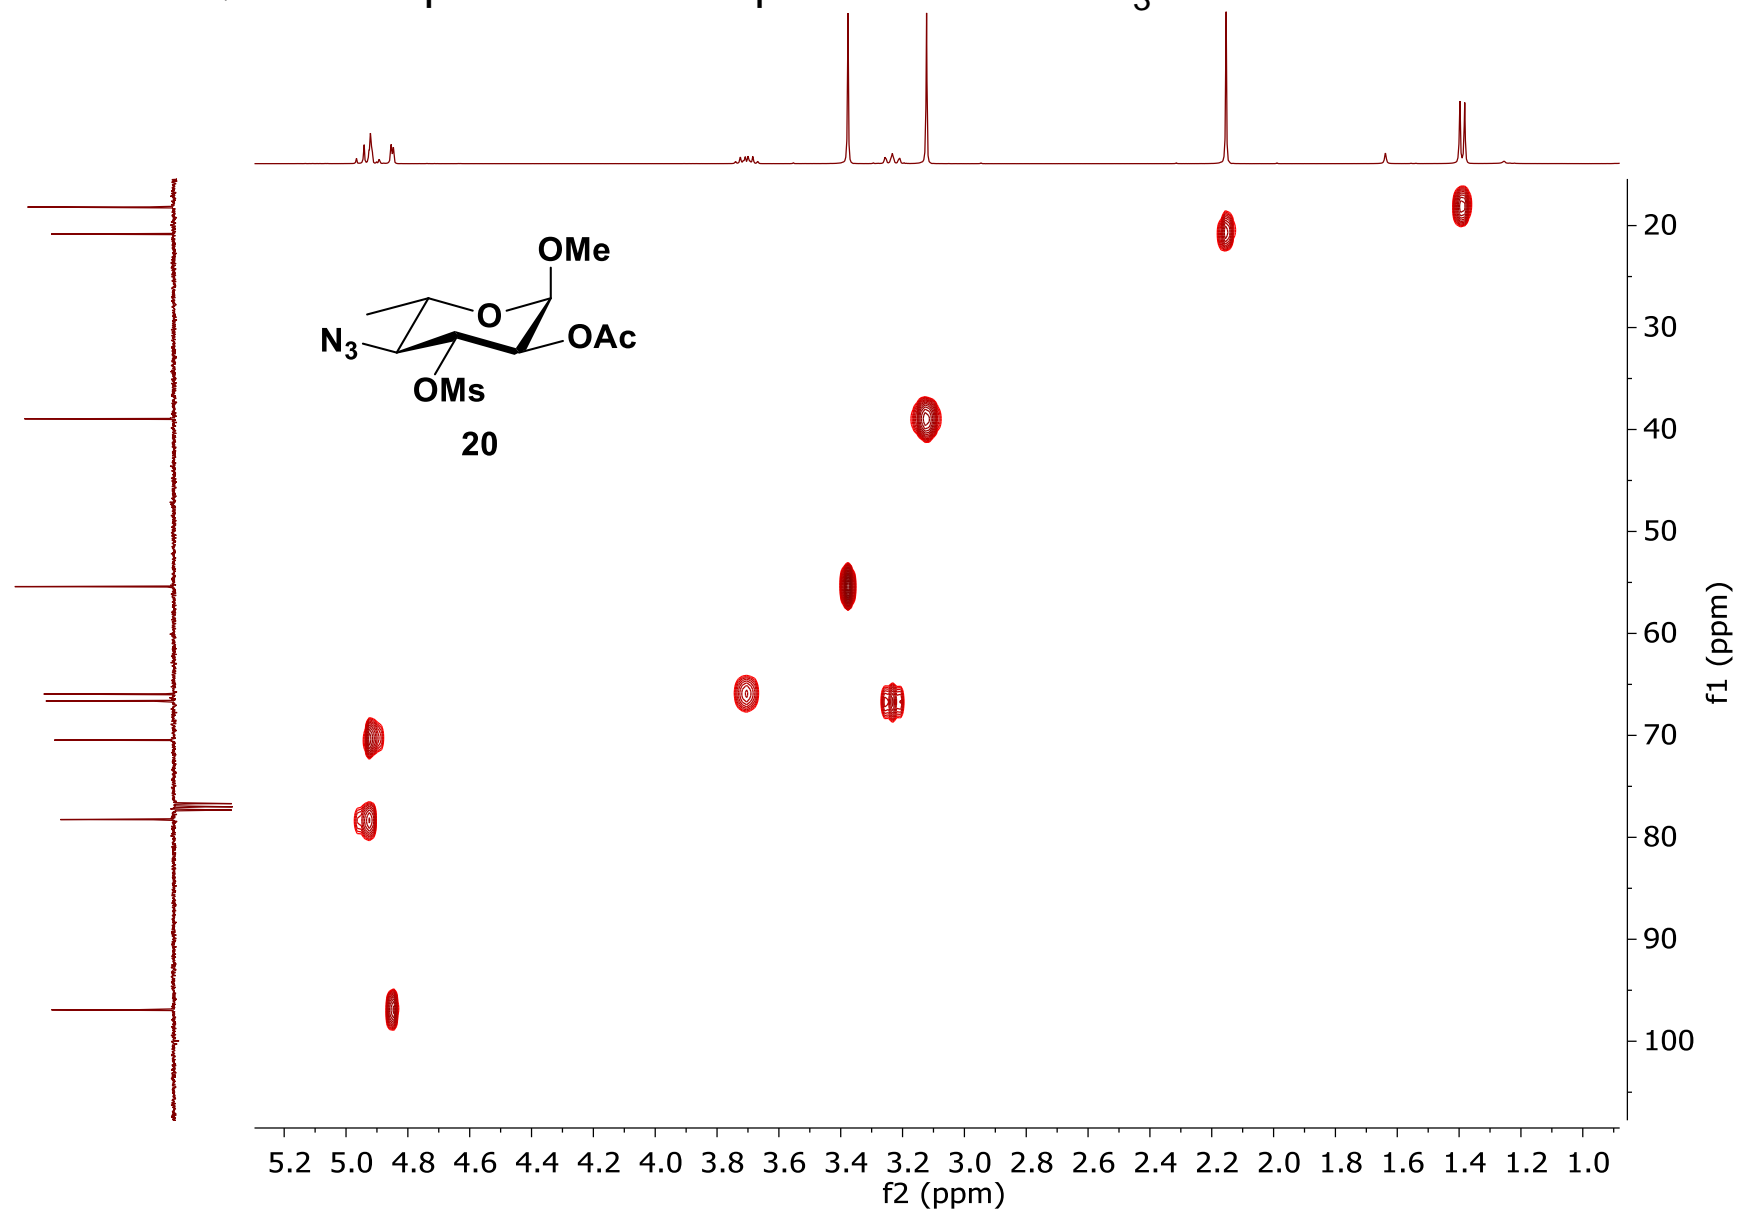

$^1\text{H}$  NMR spectrum of compound **22** in  $(\text{CD}_3)_2\text{CO}$  (400 MHz)

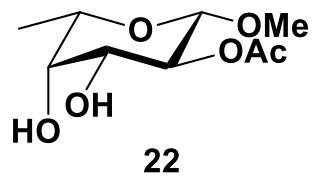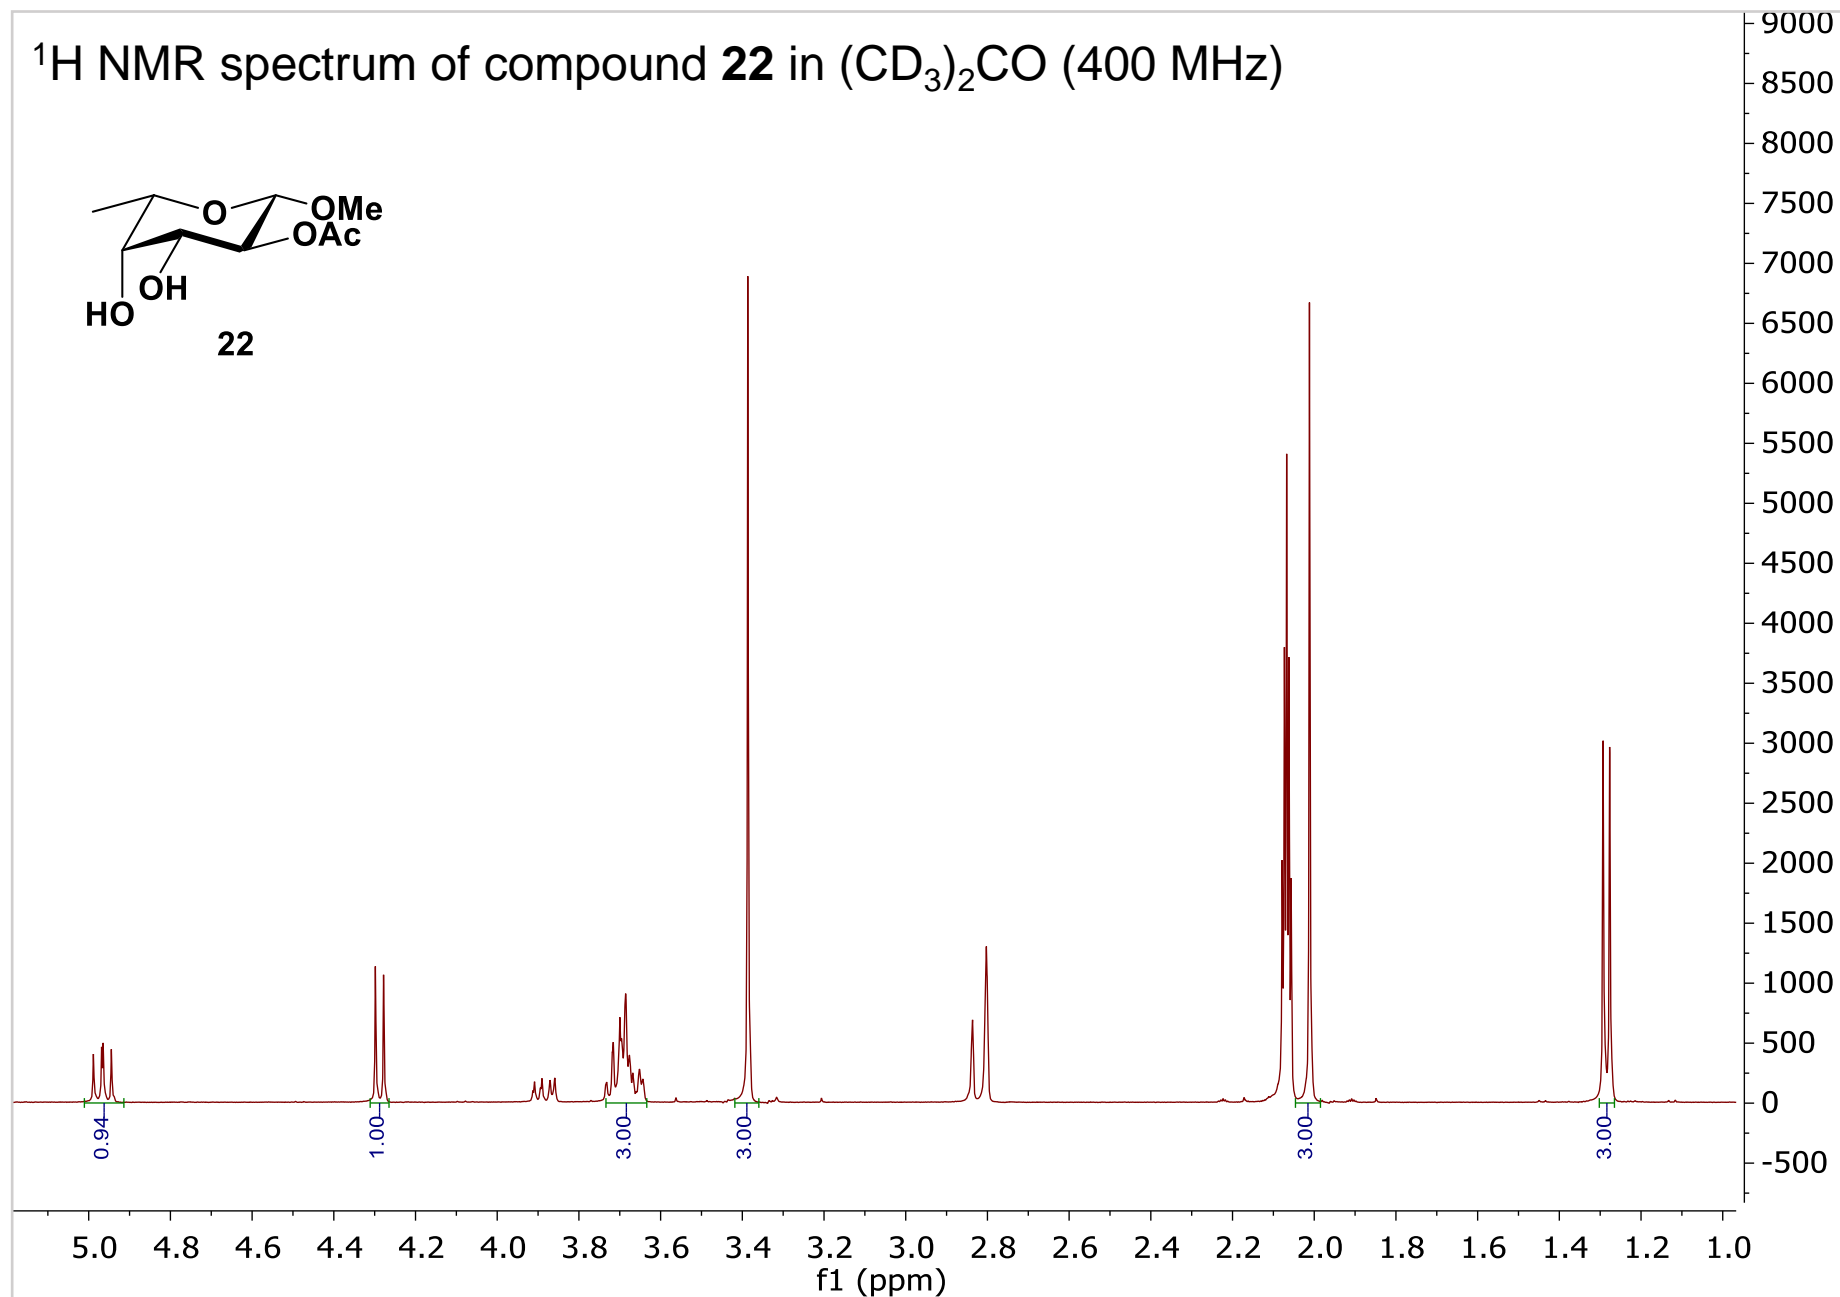

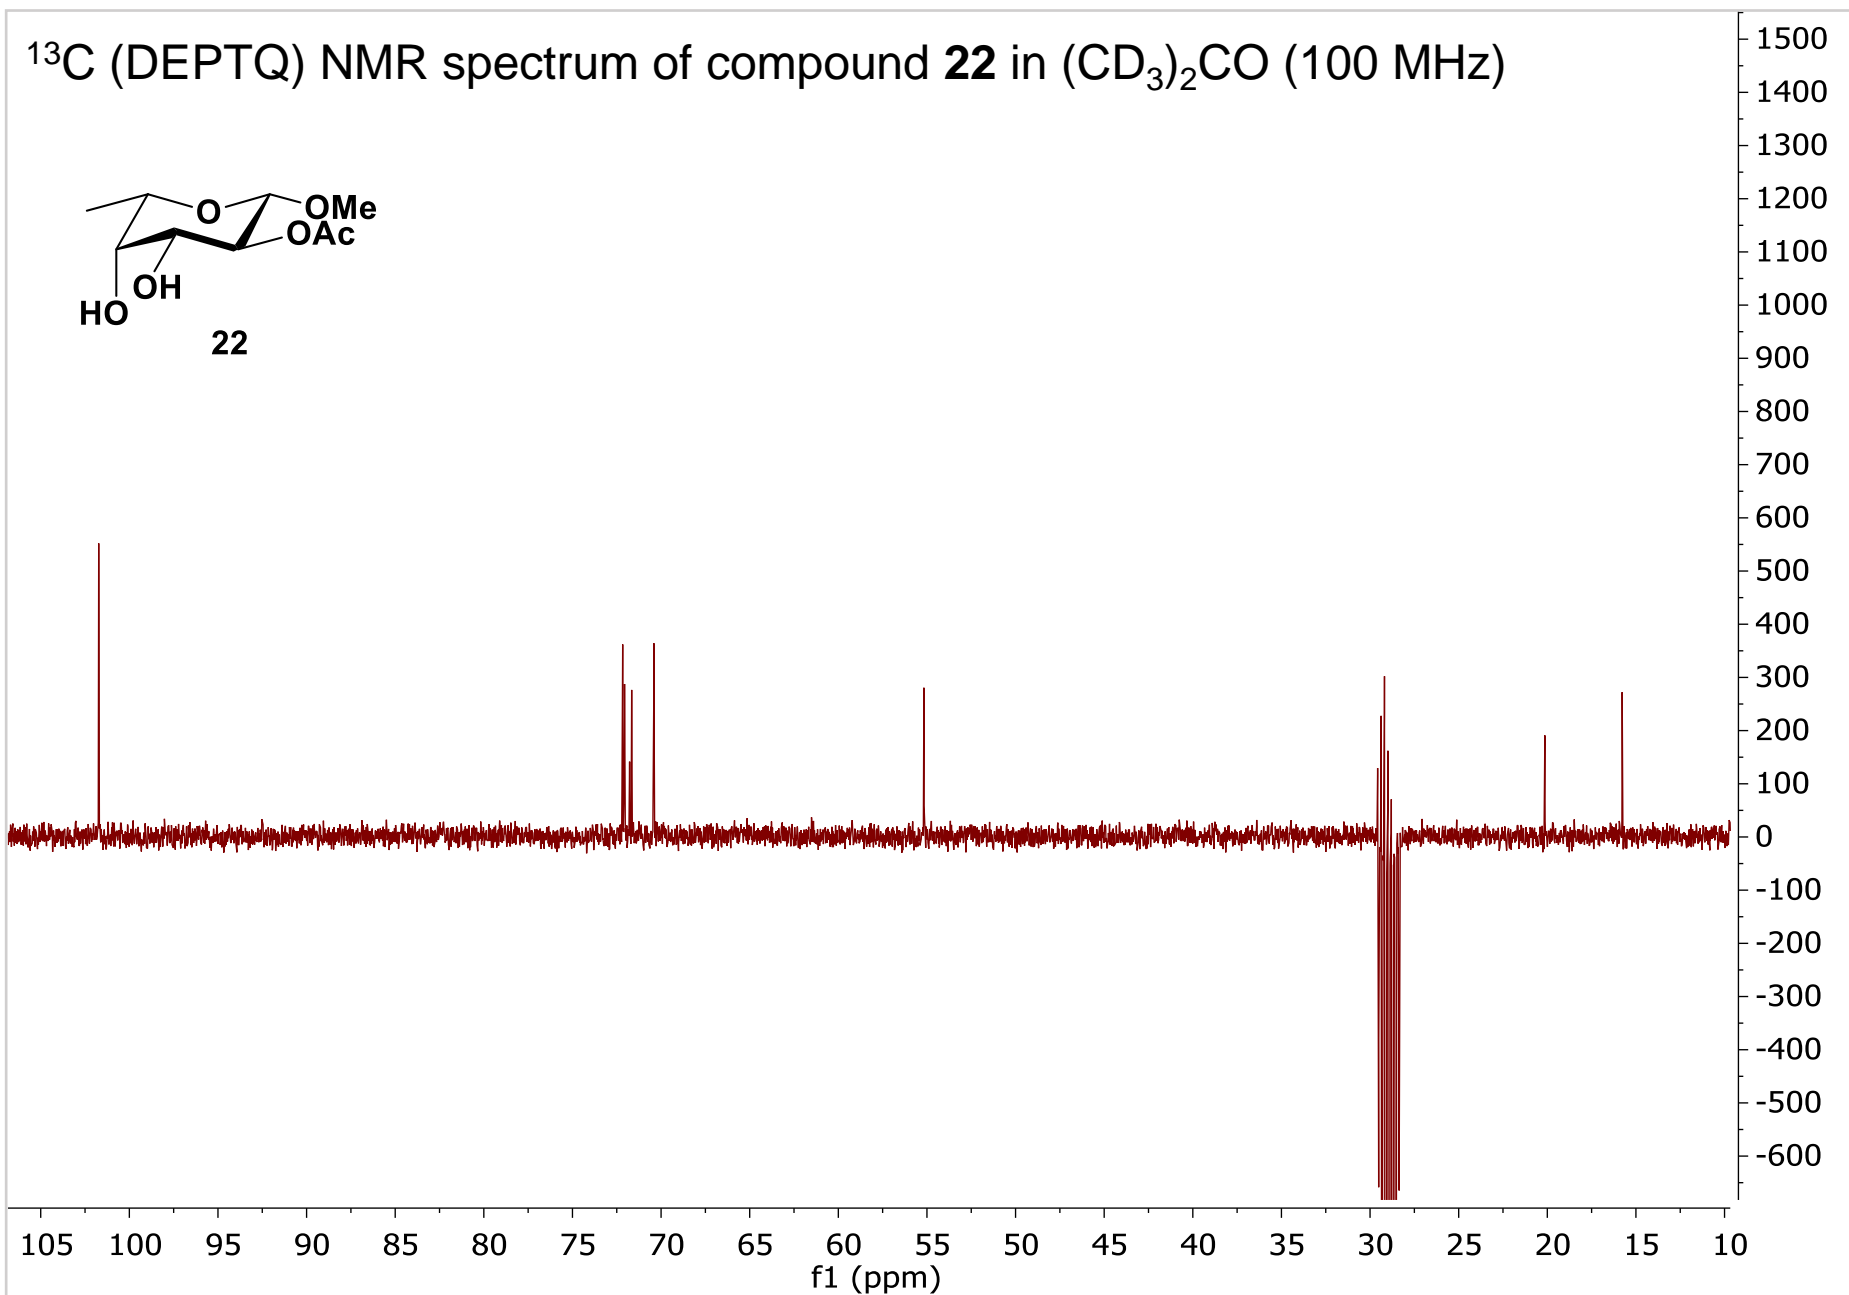

$^1\text{H}$ - $^1\text{H}$  GCOSY NMR spectrum of compound **22** in  $(\text{CD}_3)_2\text{CO}$

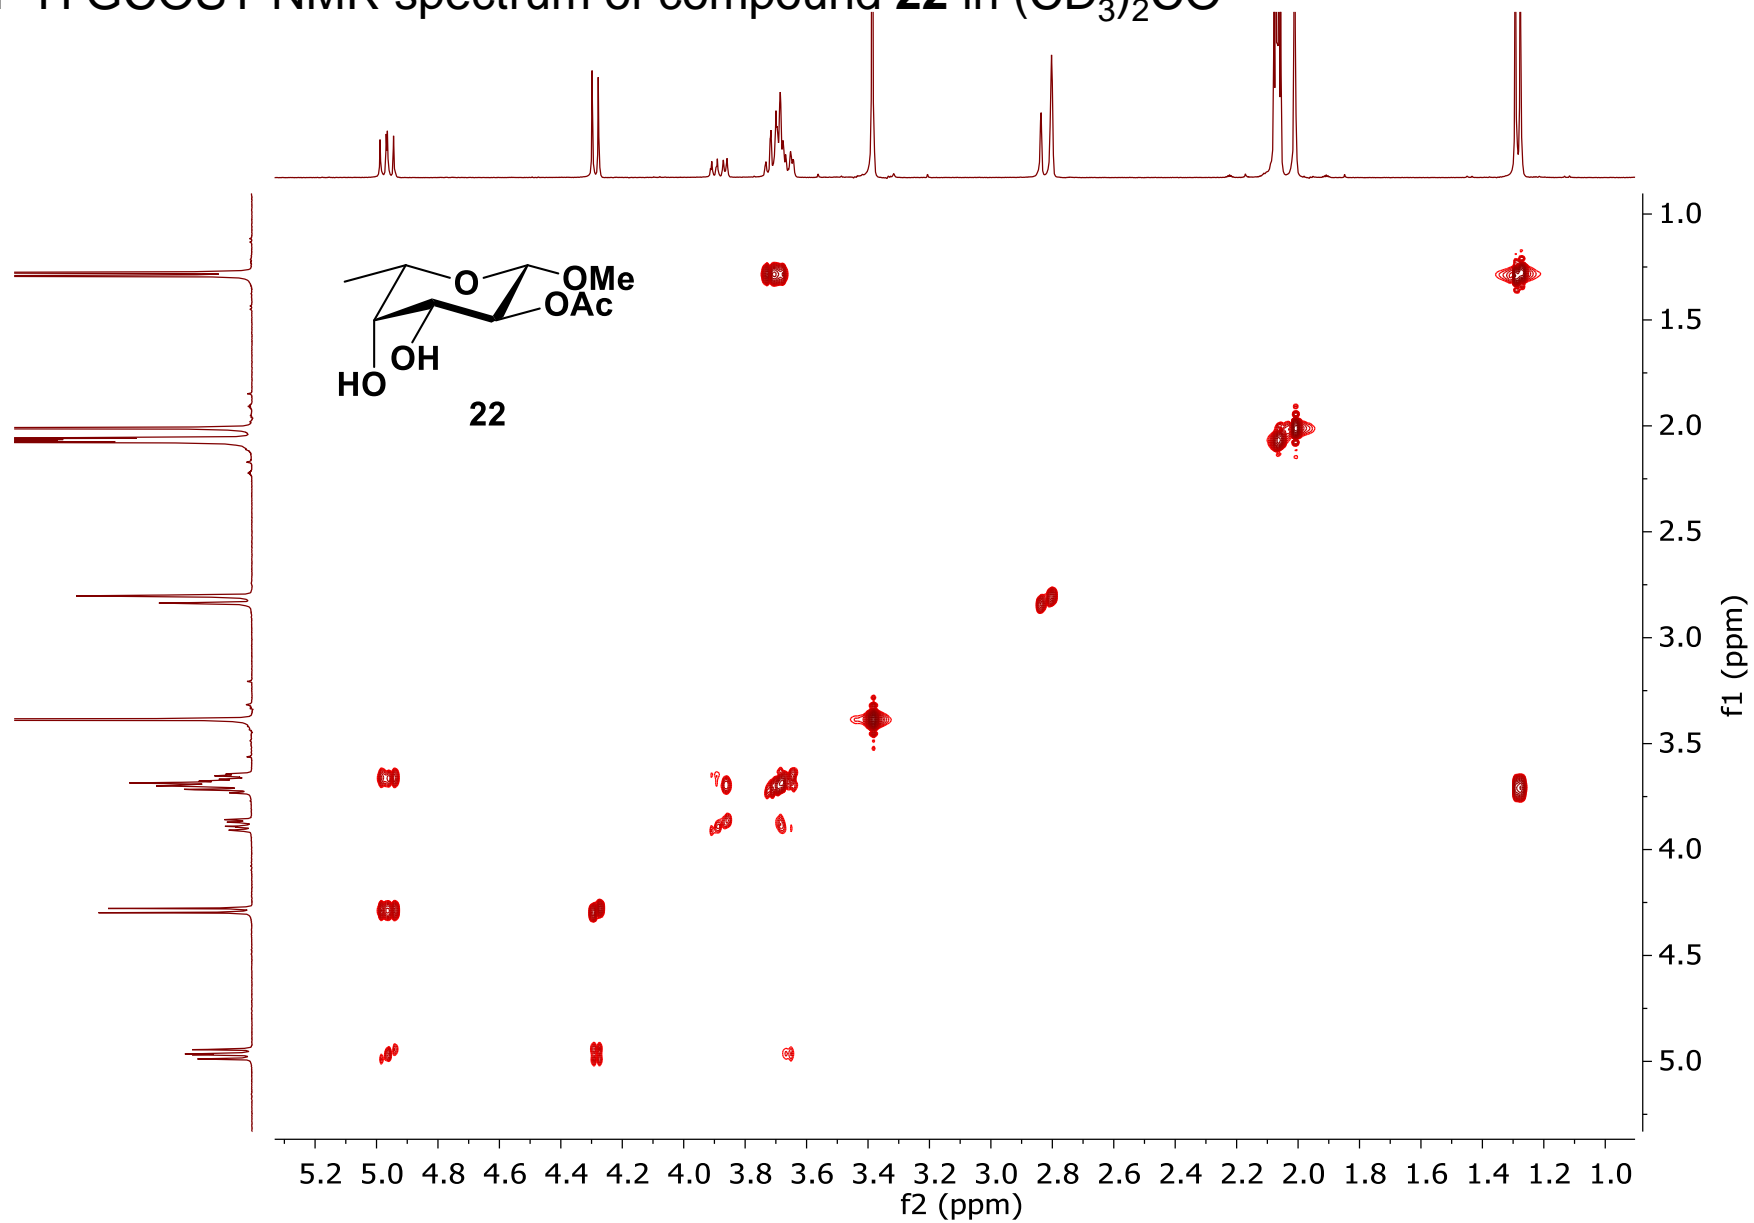

$^1\text{H}$ - $^{13}\text{C}$  GHSQC NMR spectrum of compound **22** in  $(\text{CD}_3)_2\text{CO}$

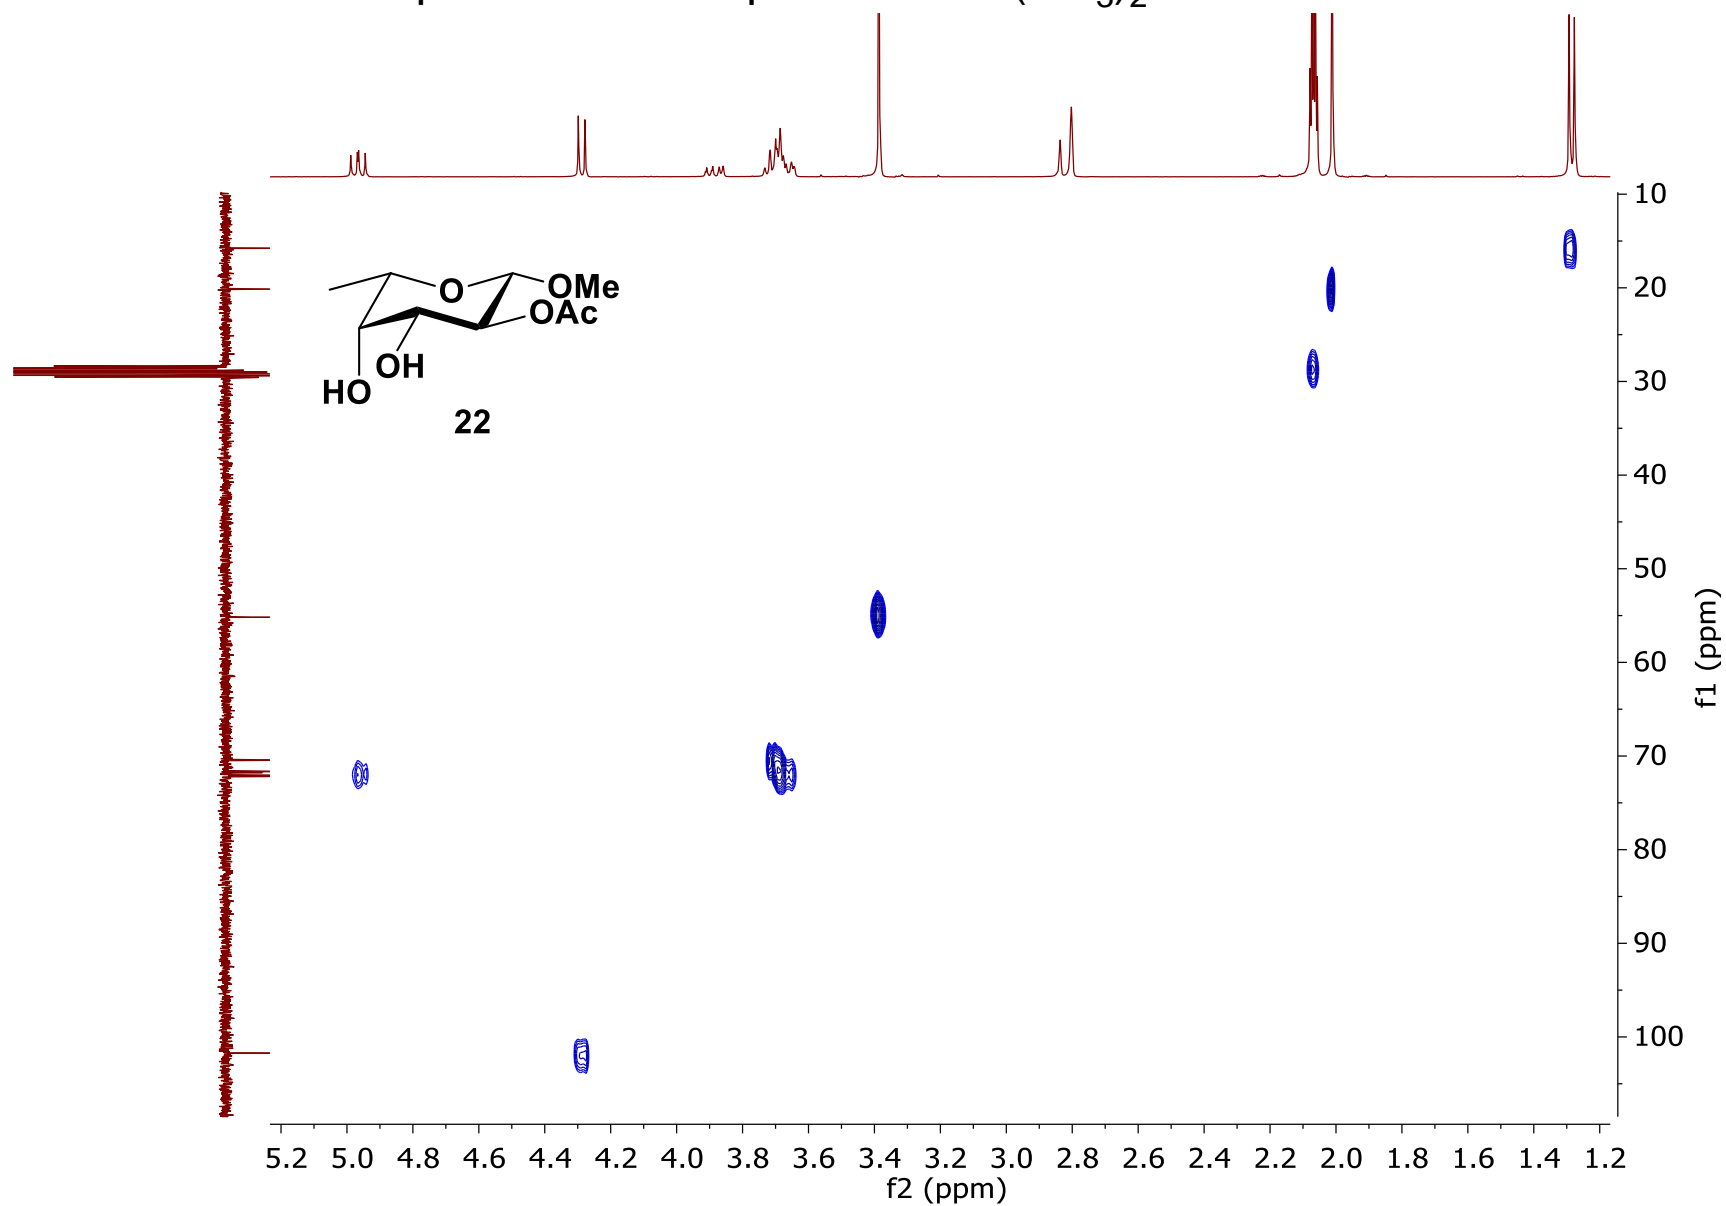

$^1\text{H}$  NMR spectrum of compound **23** in  $\text{CDCl}_3$  (400 MHz)

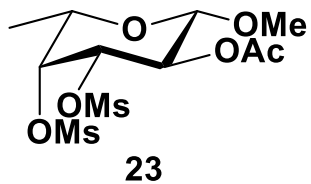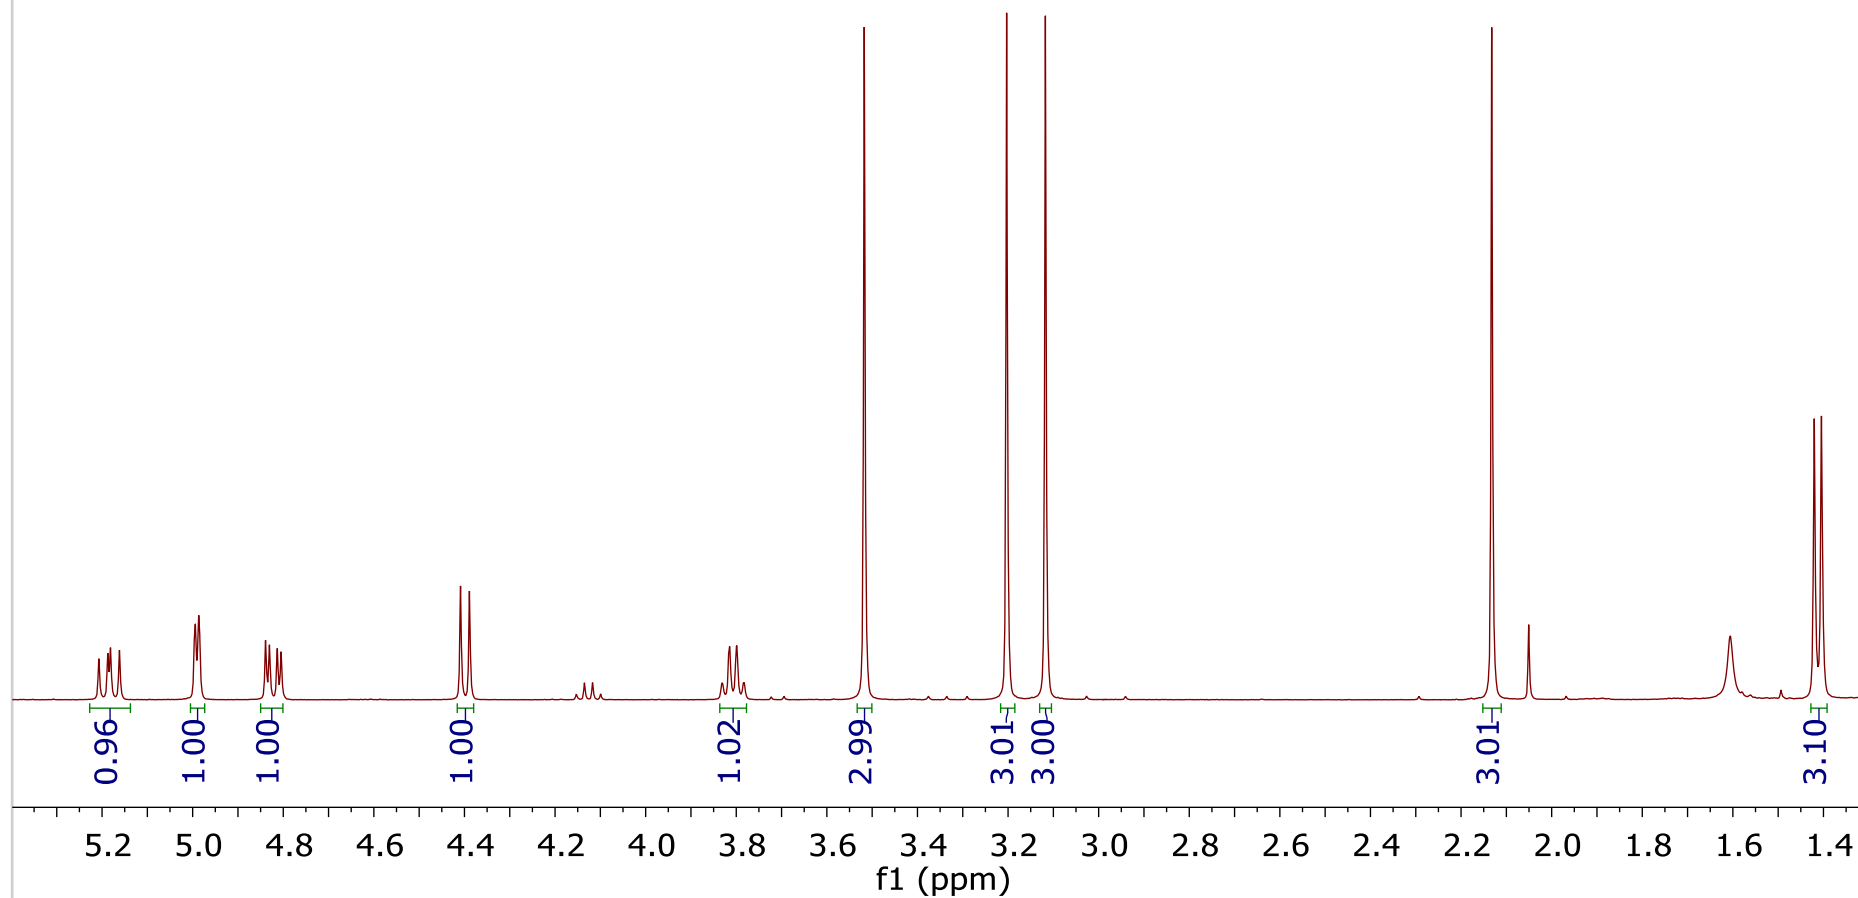

$^{13}\text{C}$  (DEPTQ) NMR spectrum of compound **23** in  $\text{CDCl}_3$  (100 MHz)

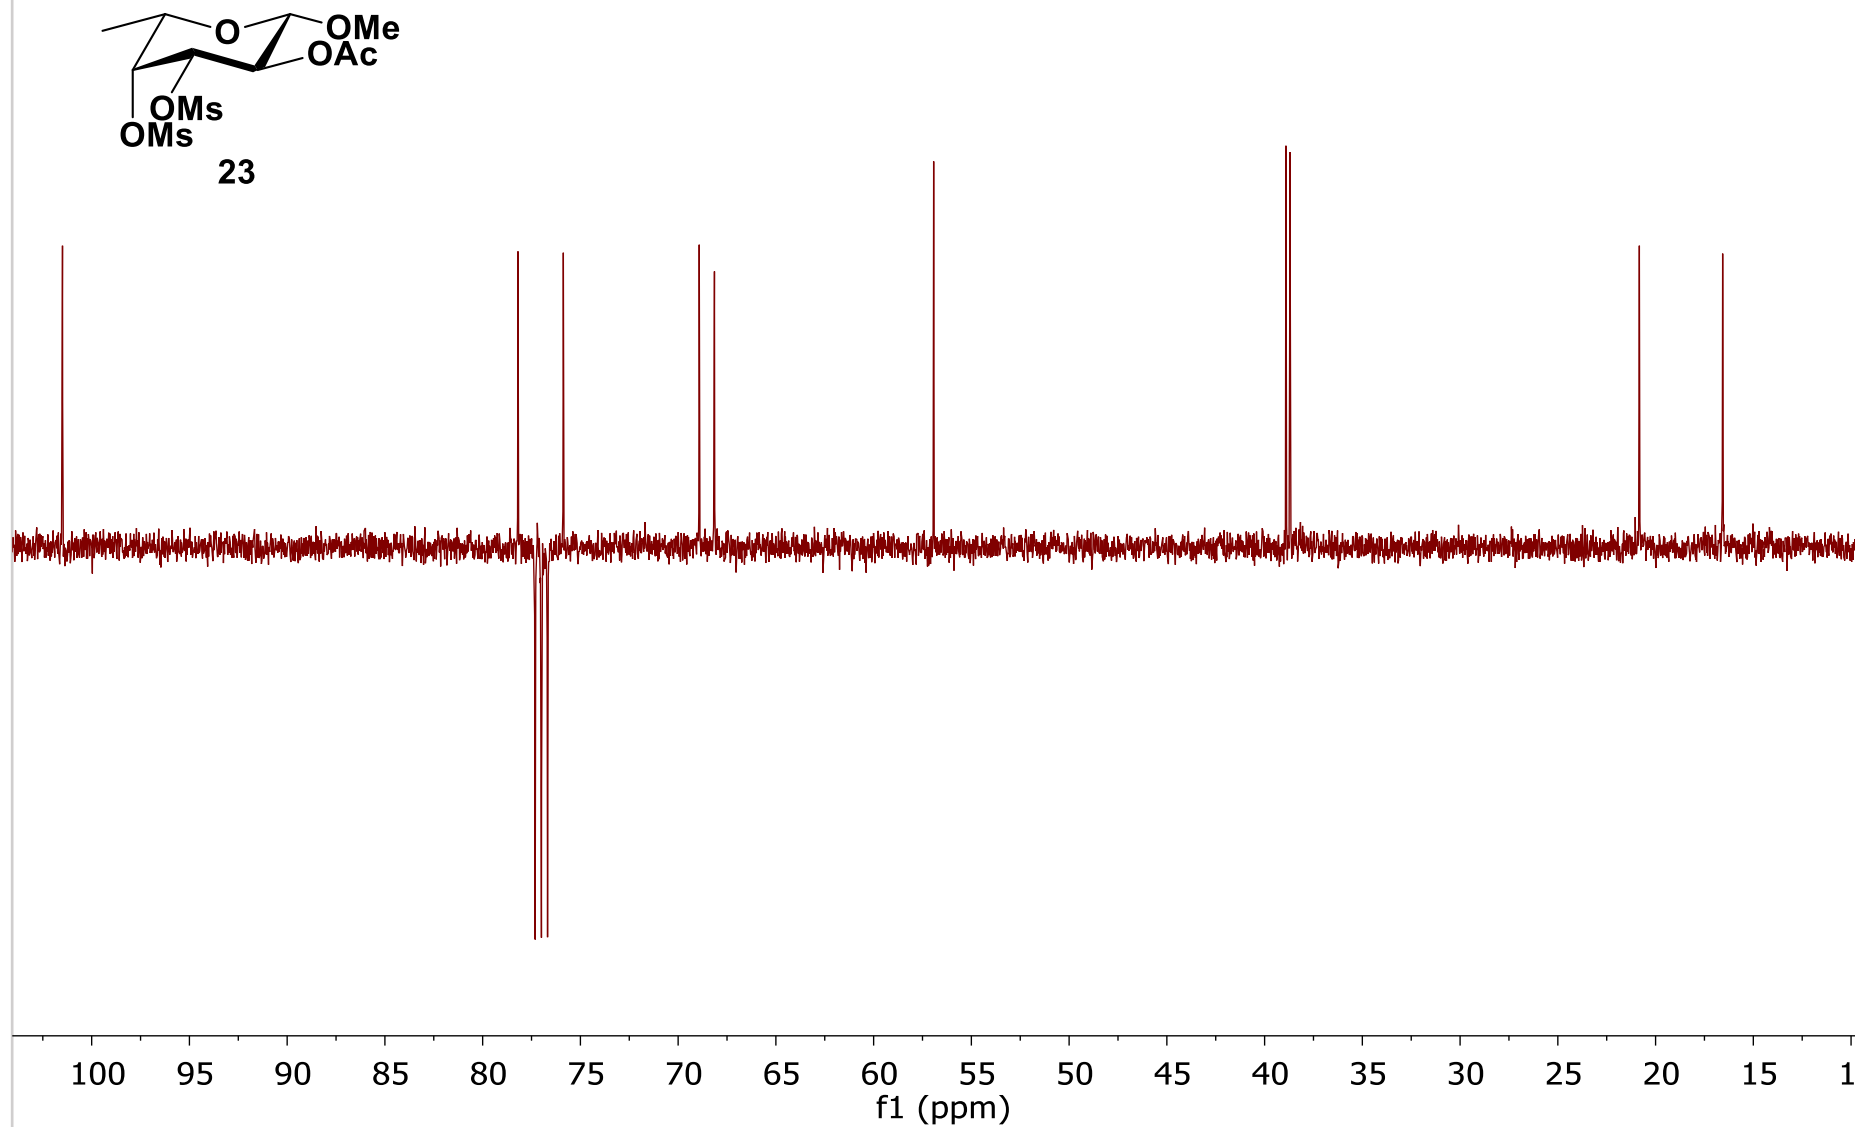



$^1\text{H}$ - $^1\text{H}$  GCOSY NMR spectrum of compound **23** in  $\text{CDCl}_3$

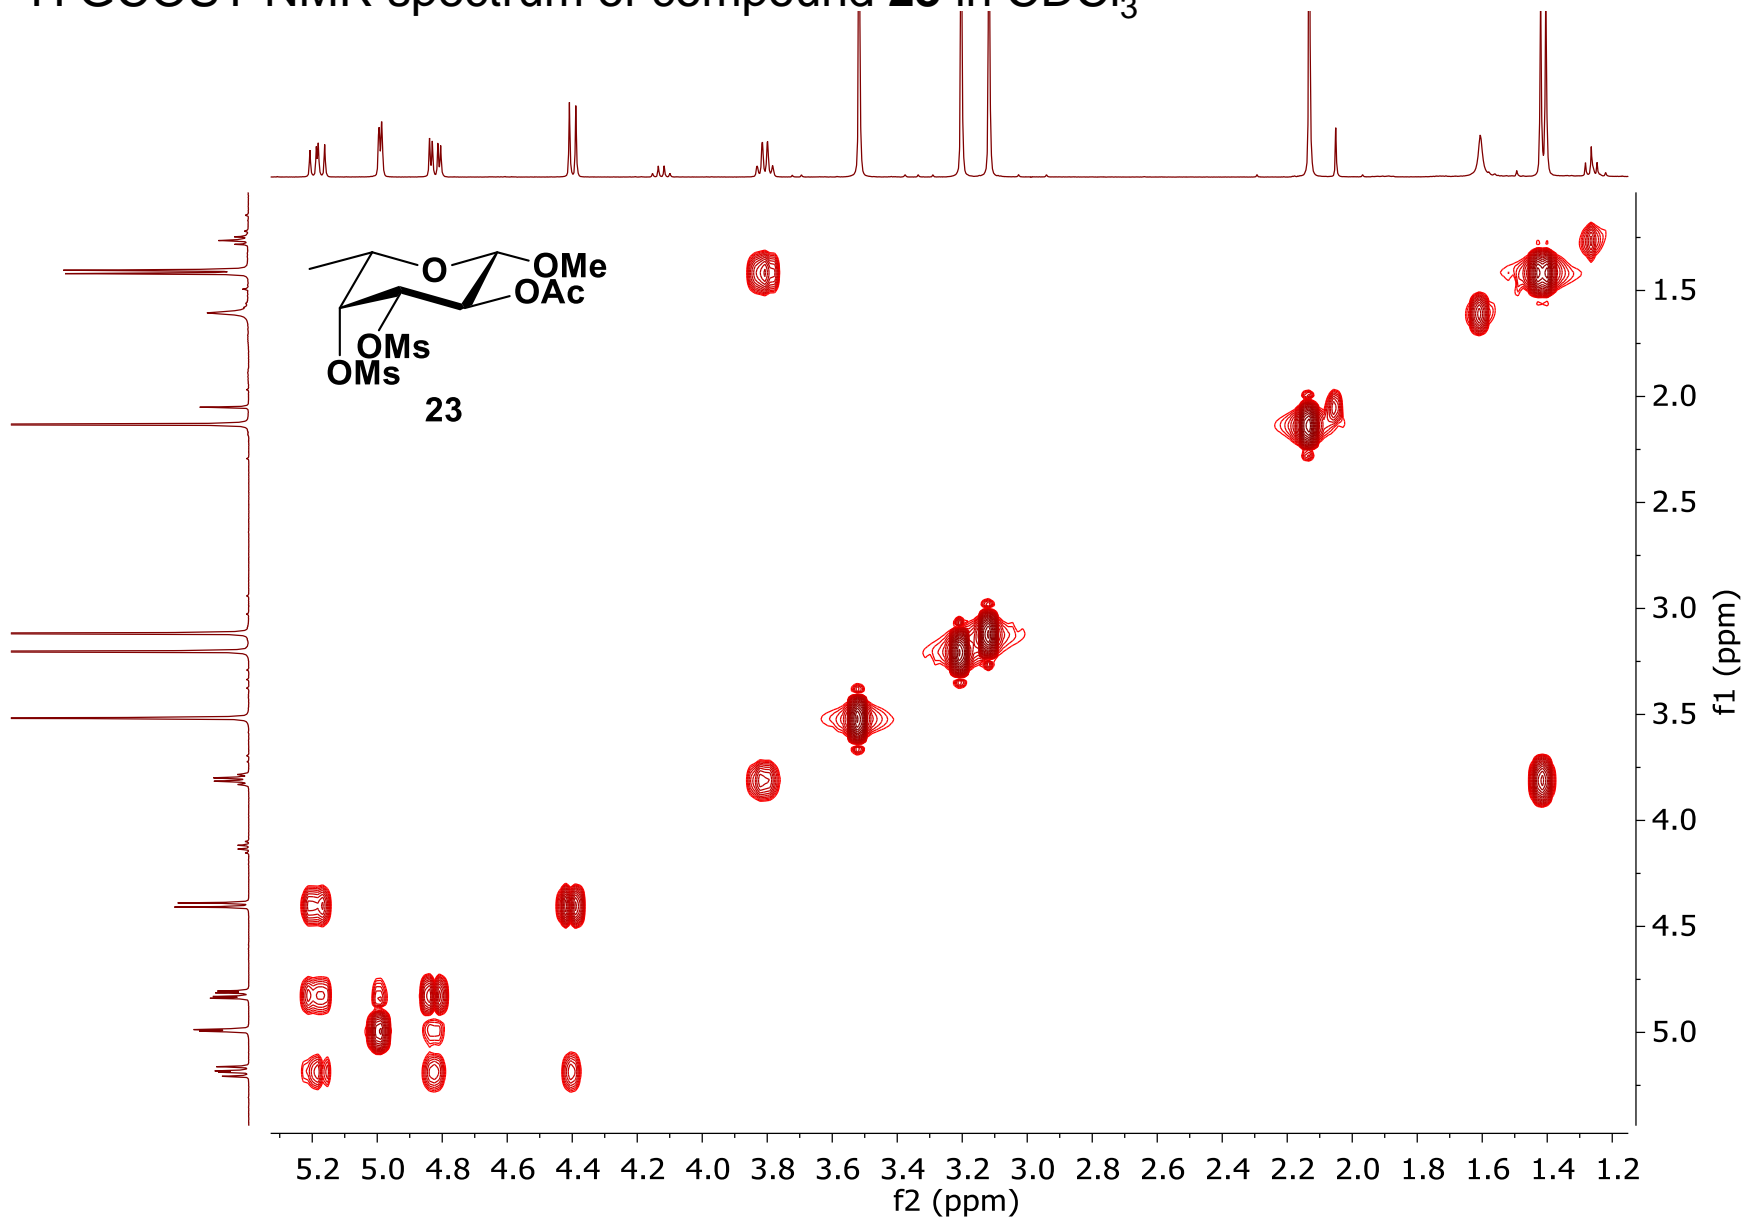

$^1\text{H}$ - $^{13}\text{C}$  GHSQC NMR spectrum of compound **23** in  $\text{CDCl}_3$

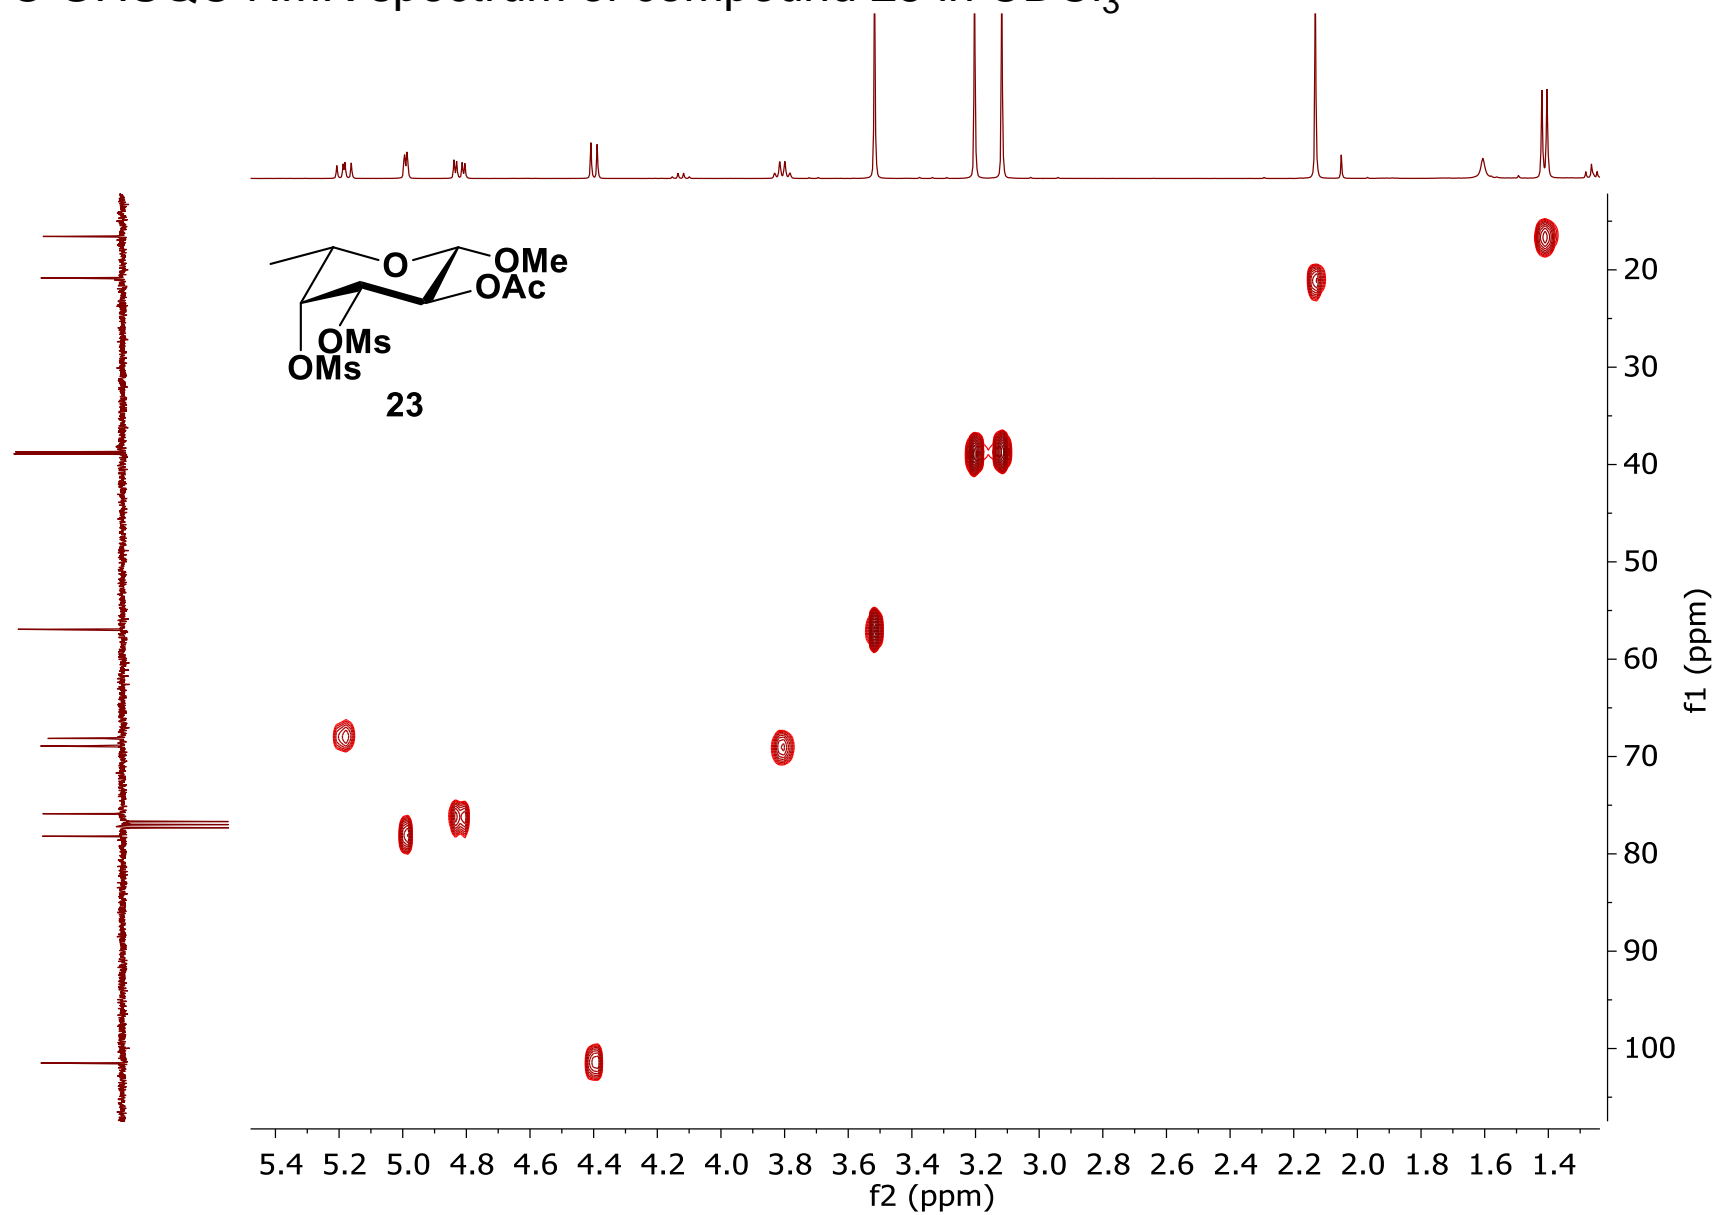

$^1\text{H}$  NMR spectrum of compound **24** in  $\text{CDCl}_3$  (400 MHz)

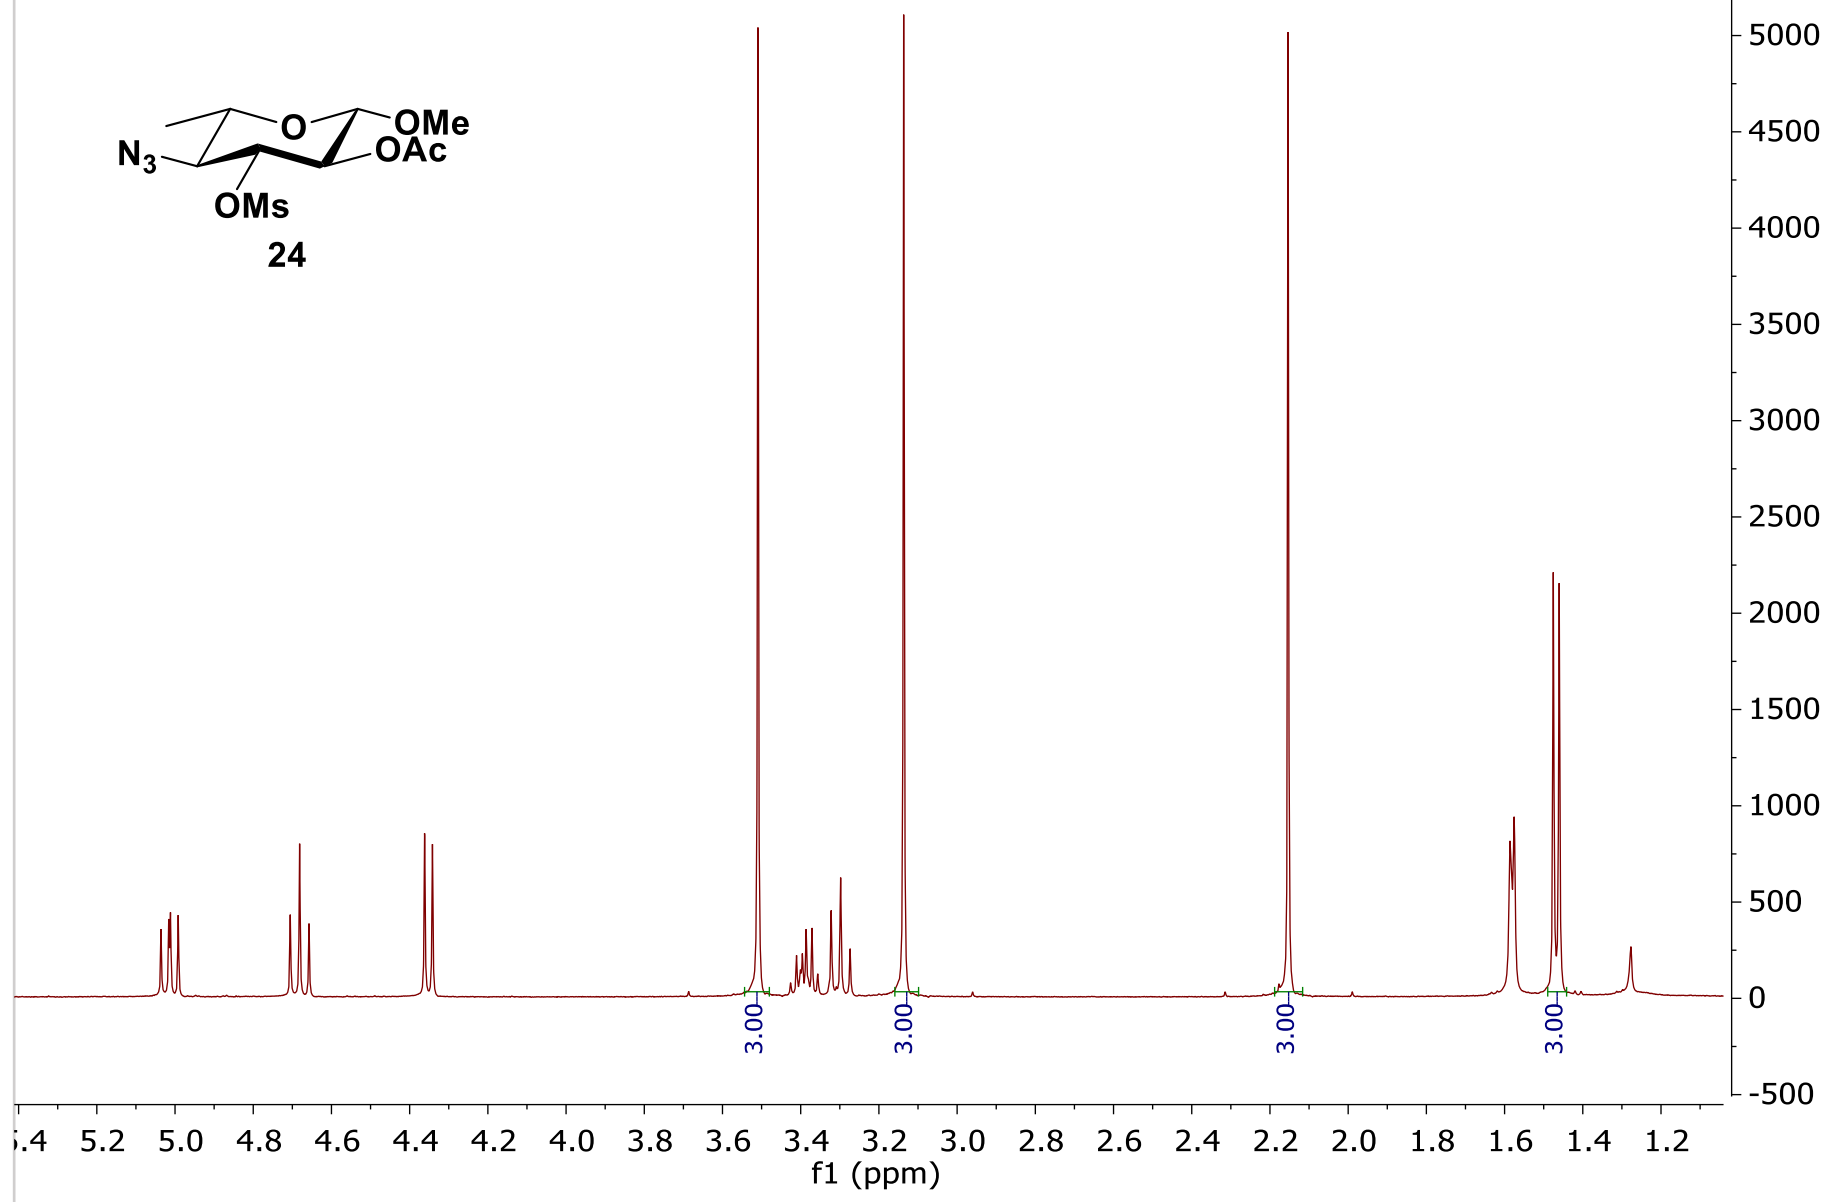

$^{13}\text{C}$  (DEPTQ) NMR spectrum of compound **24** in  $\text{CDCl}_3$  (100 MHz)

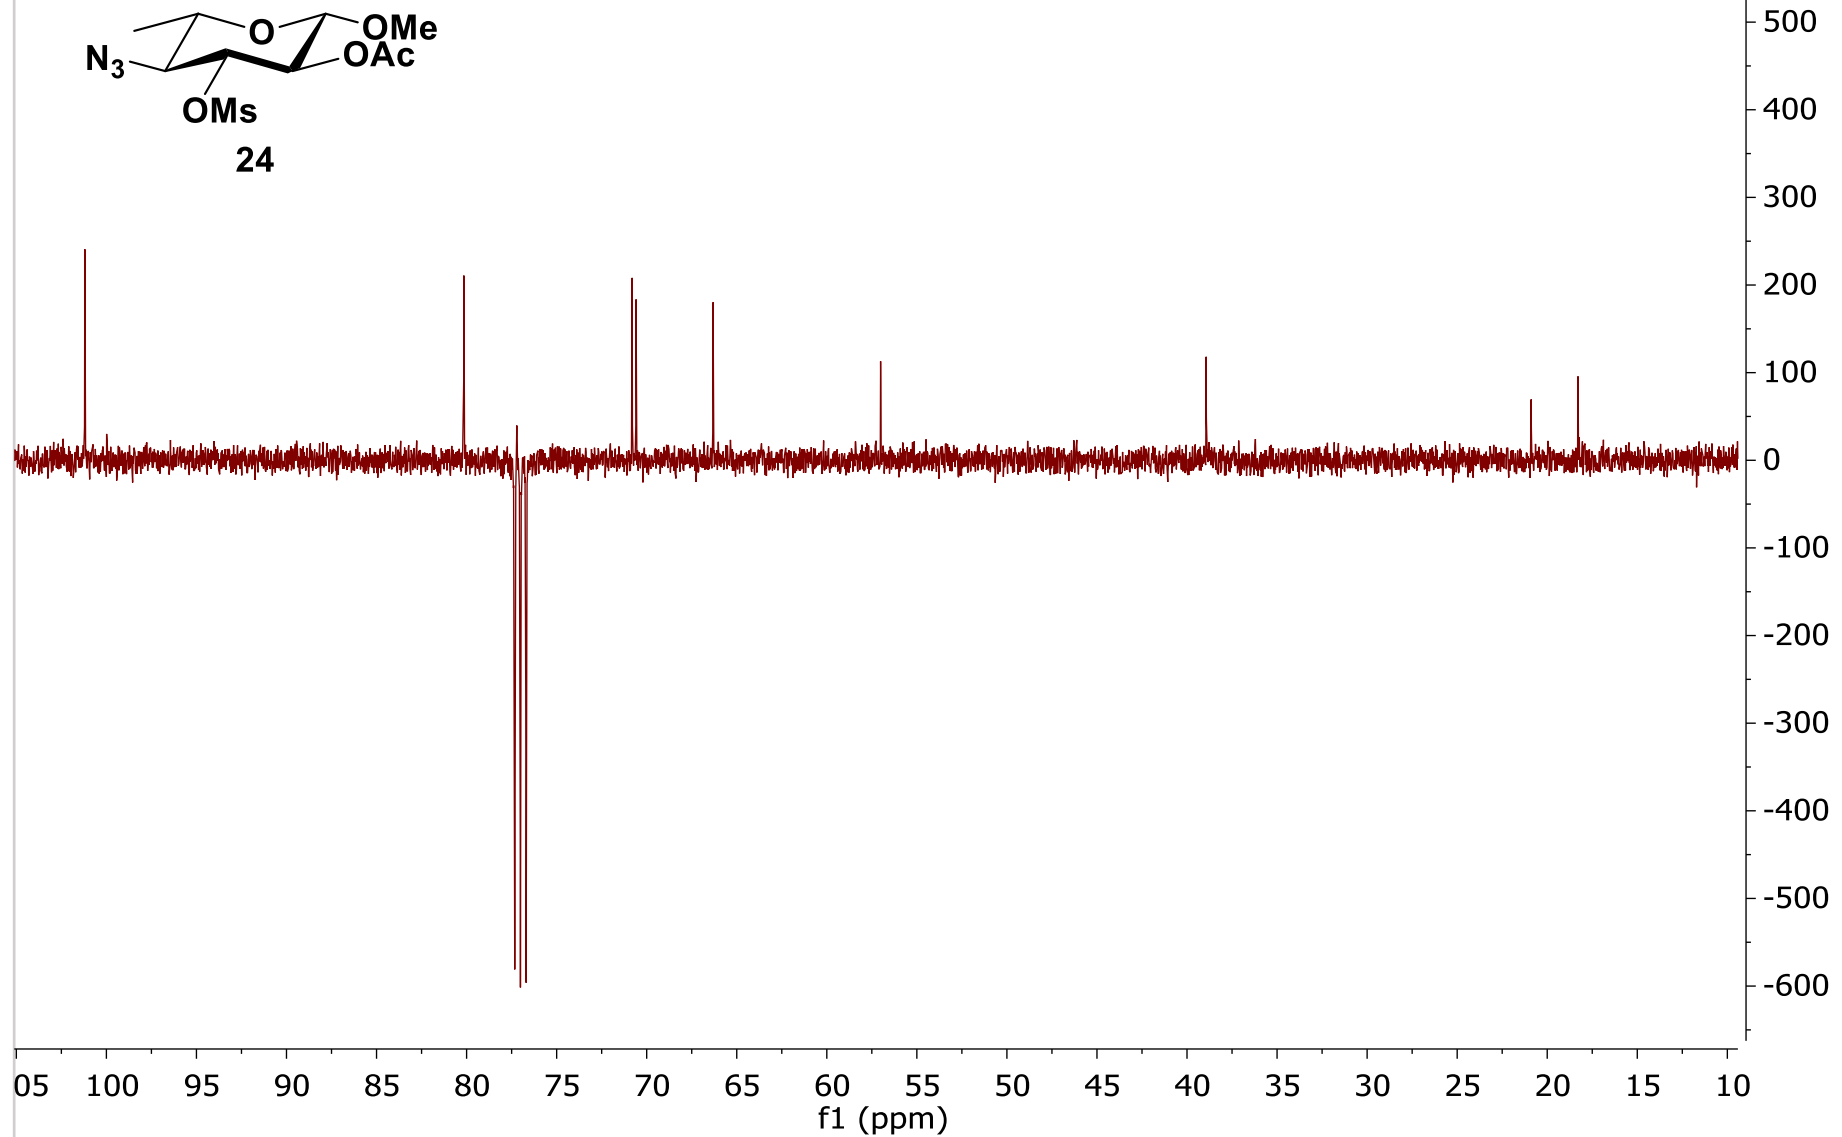

$^1\text{H}$ - $^1\text{H}$  GCOSY NMR spectrum of compound **24** in  $\text{CDCl}_3$ 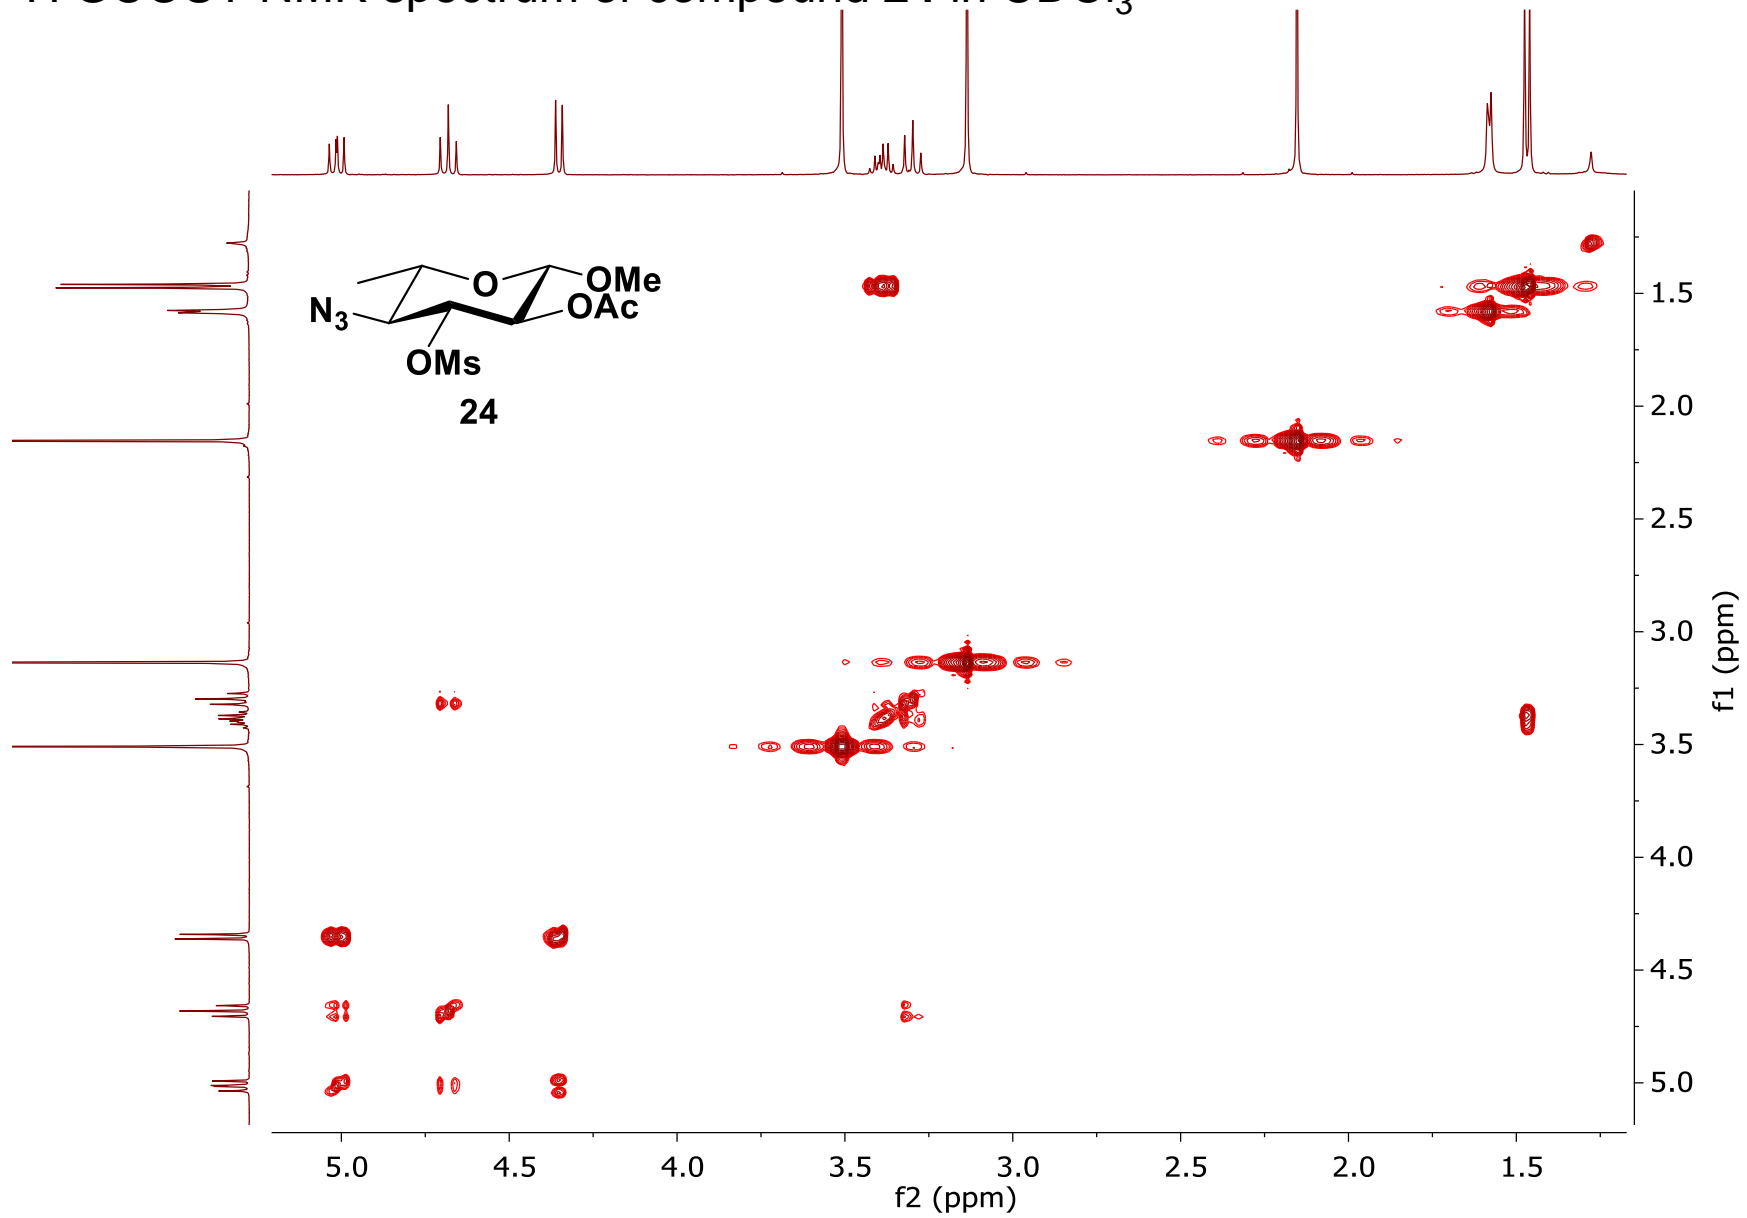

$^1\text{H}$ - $^{13}\text{C}$  GHSQC NMR spectrum of compound **24** in  $\text{CDCl}_3$

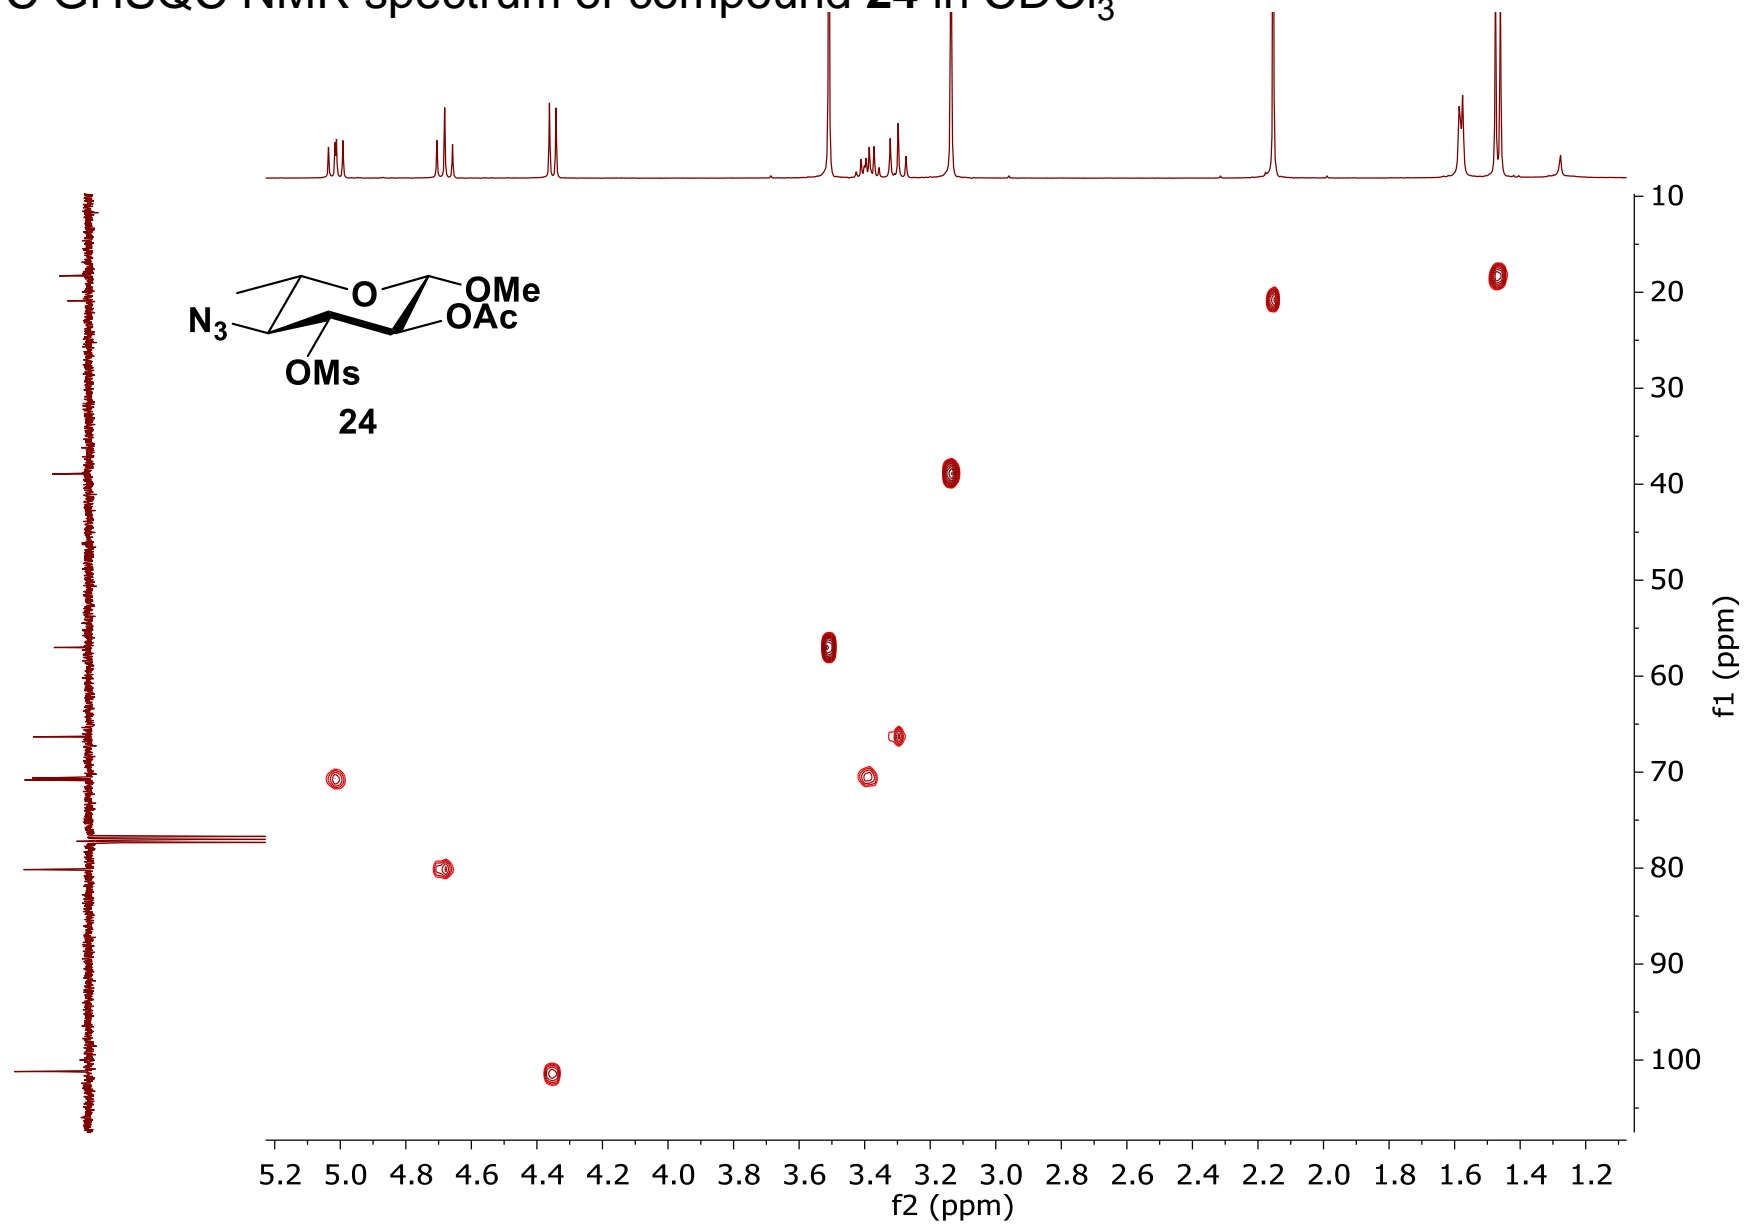

$^1\text{H}$  NMR spectrum of compound **25** in  $\text{CDCl}_3$  (400 MHz)

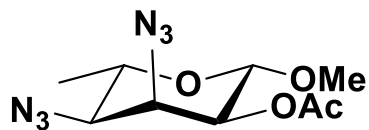

**25**

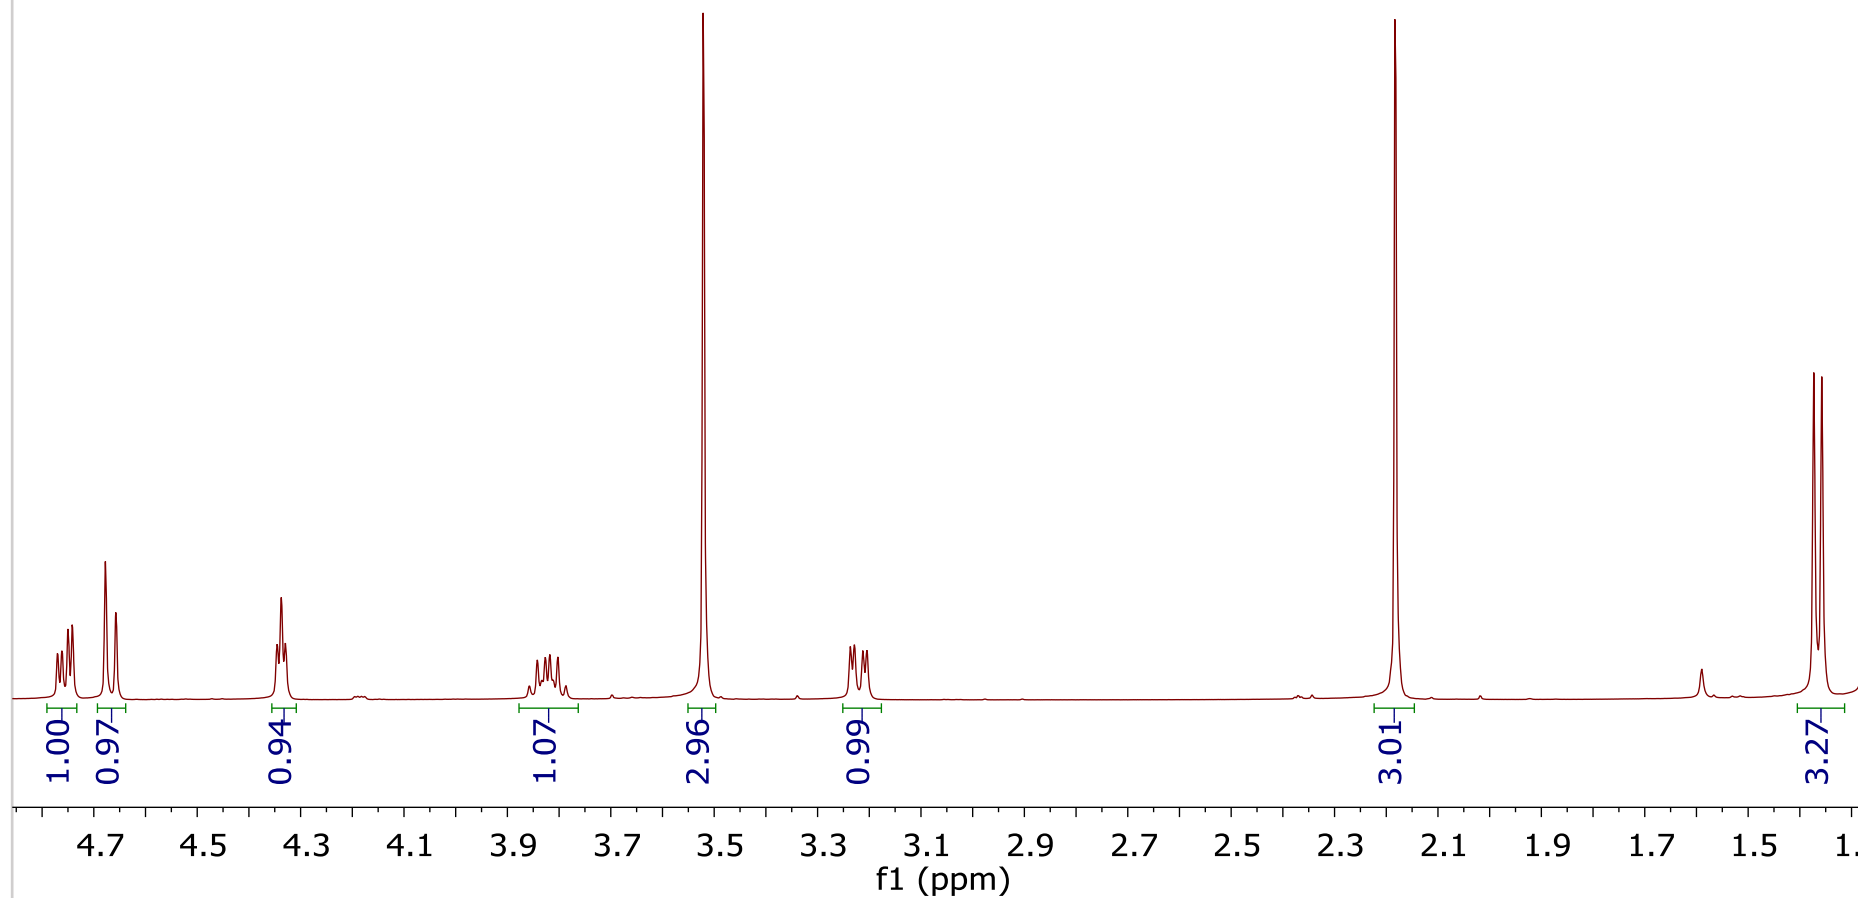

$^{13}\text{C}$  (DEPTQ) NMR spectrum of compound **25** in  $\text{CDCl}_3$  (100 MHz)

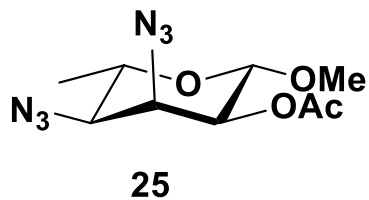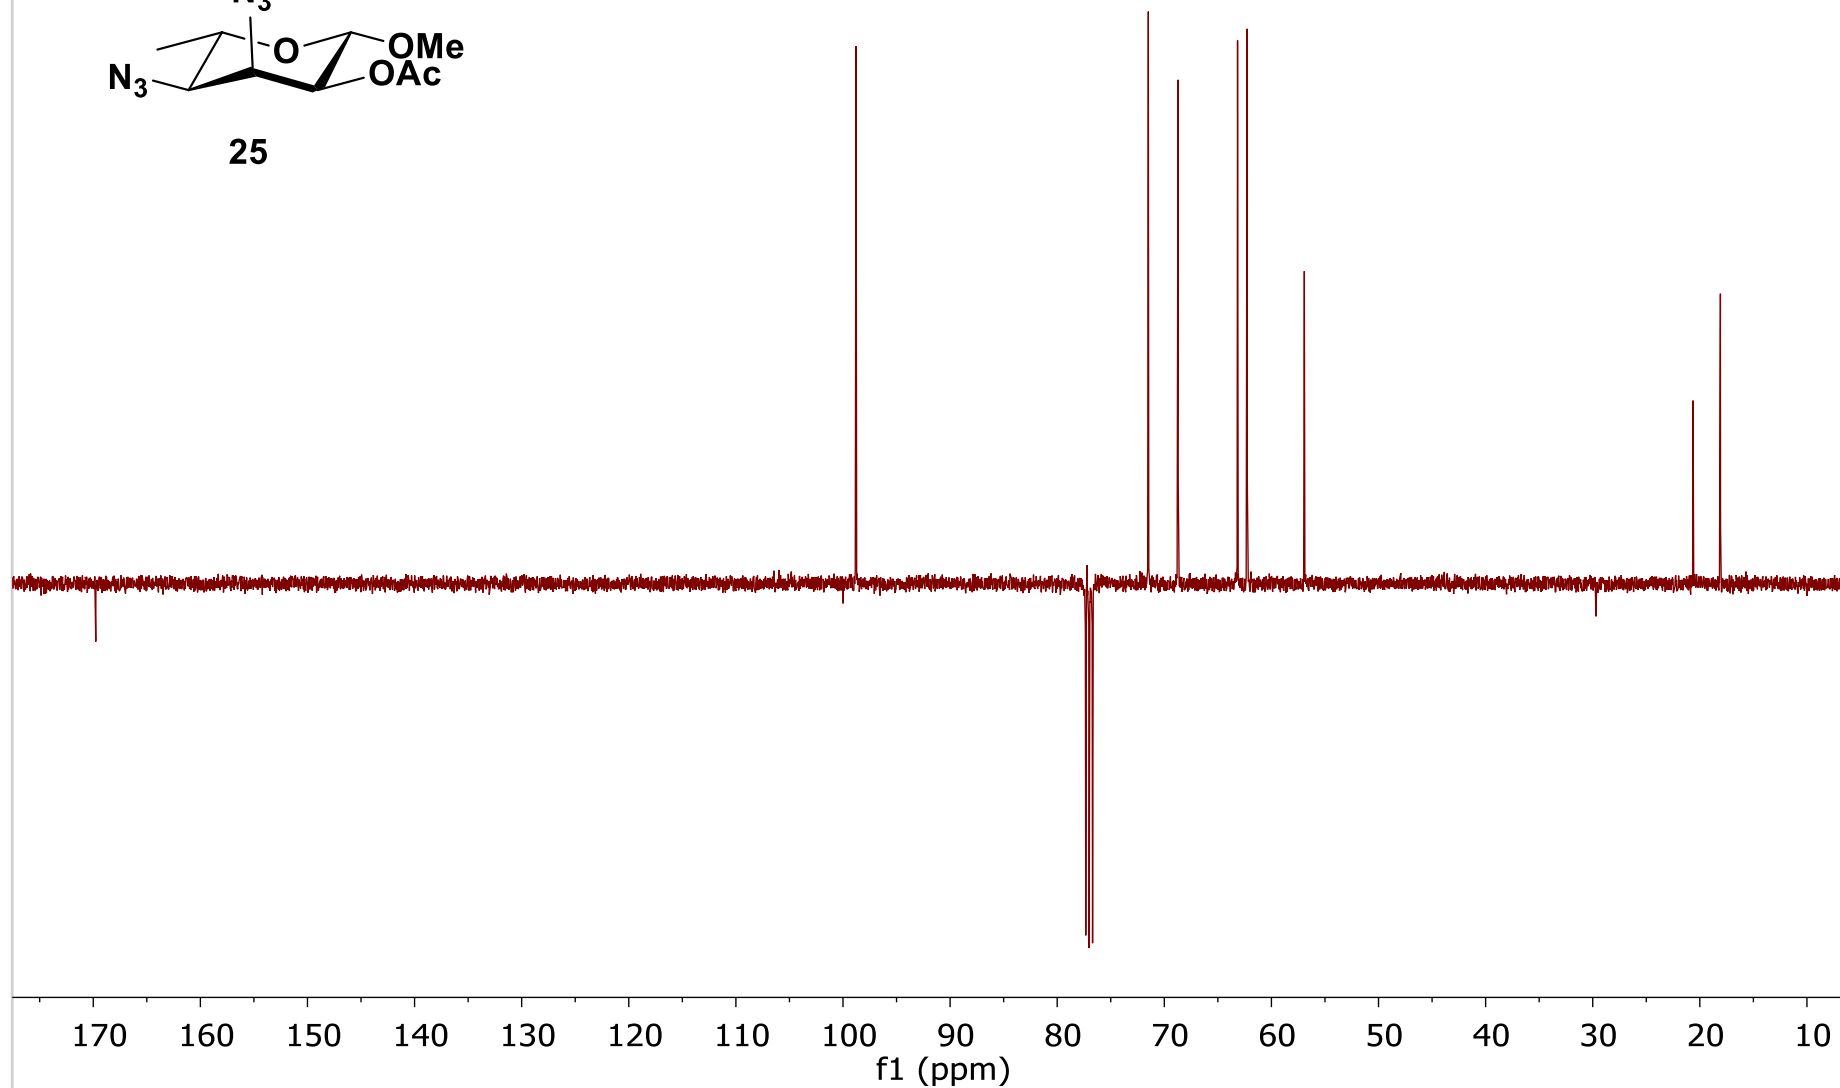



$^1\text{H}$ - $^1\text{H}$  GCOSY NMR spectrum of compound **25** in  $\text{CDCl}_3$

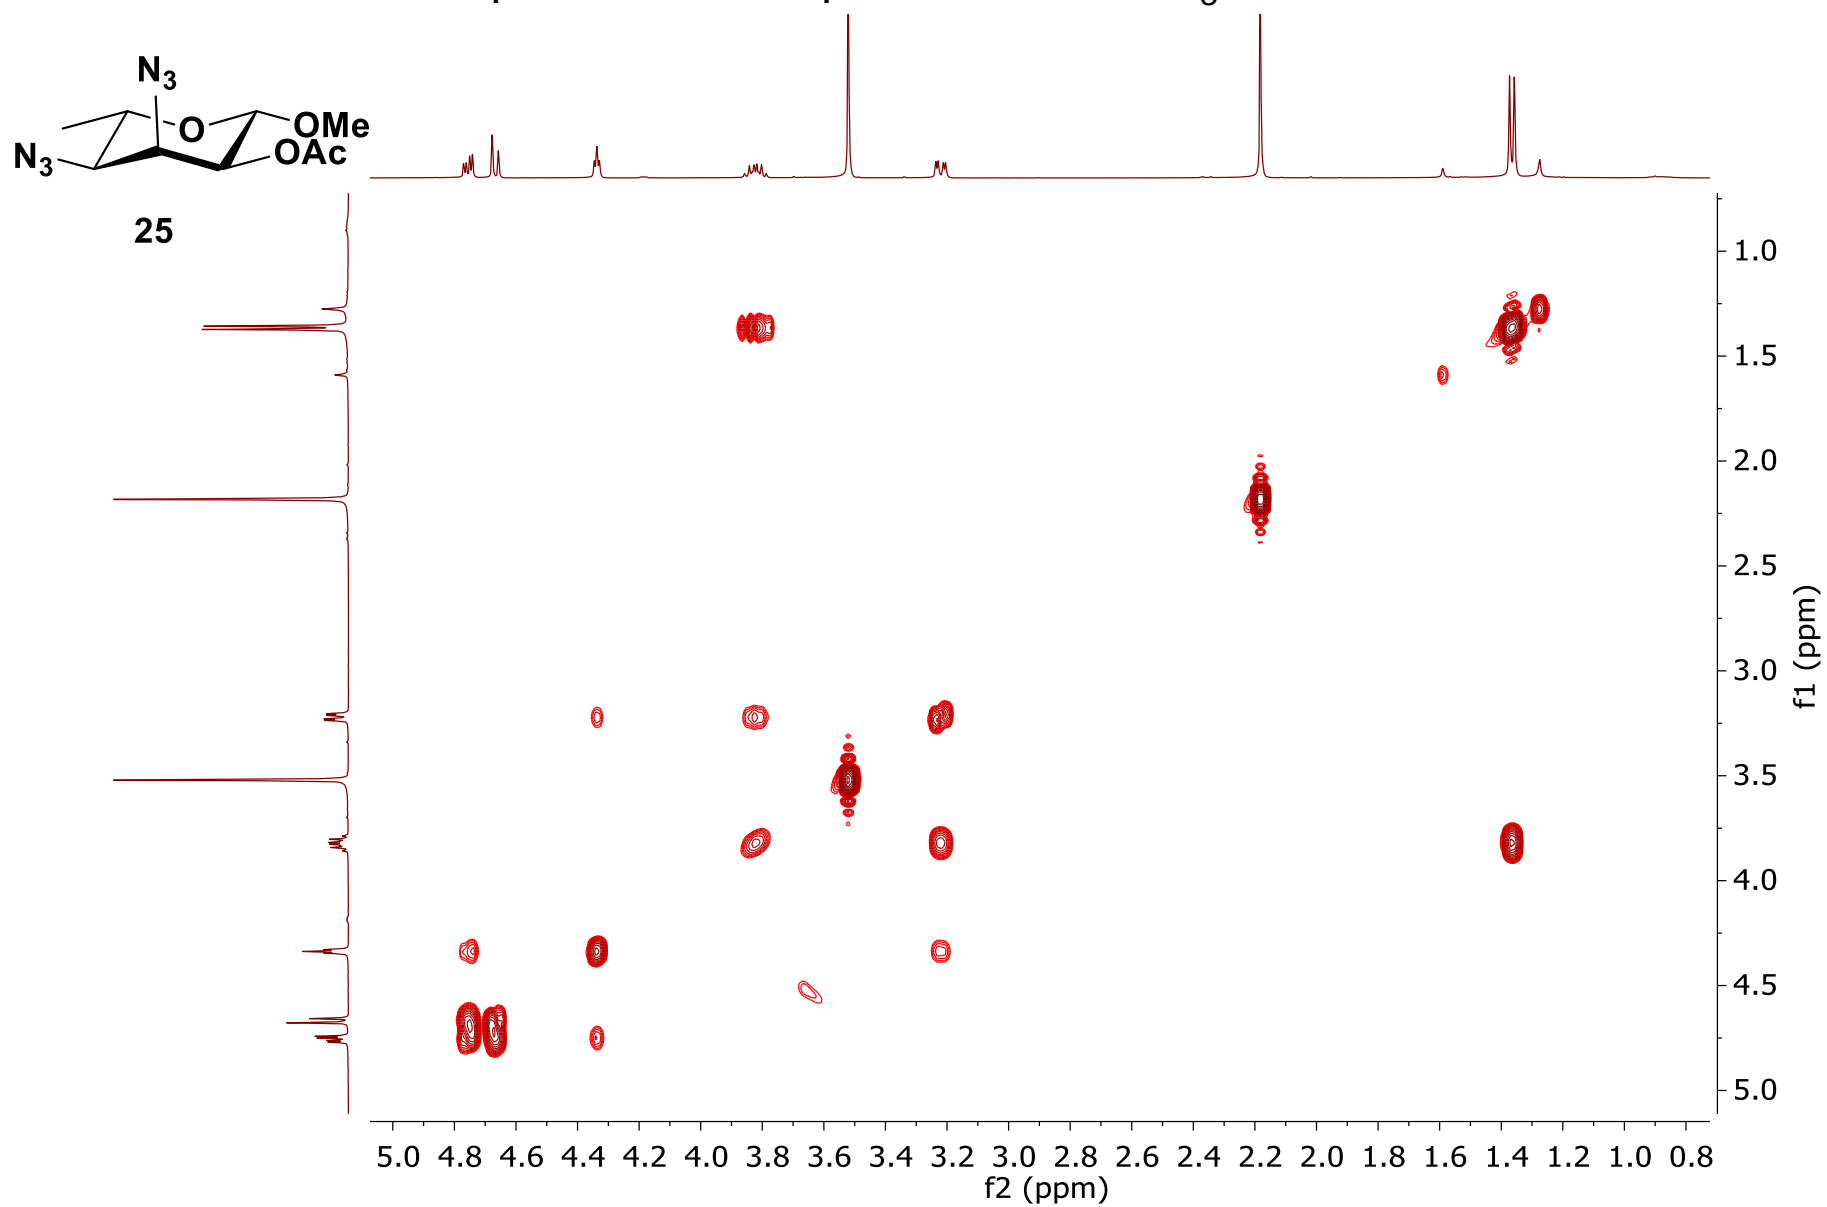

$^1\text{H}$ - $^{13}\text{C}$  GHSQC NMR spectrum of compound **25** in  $\text{CDCl}_3$

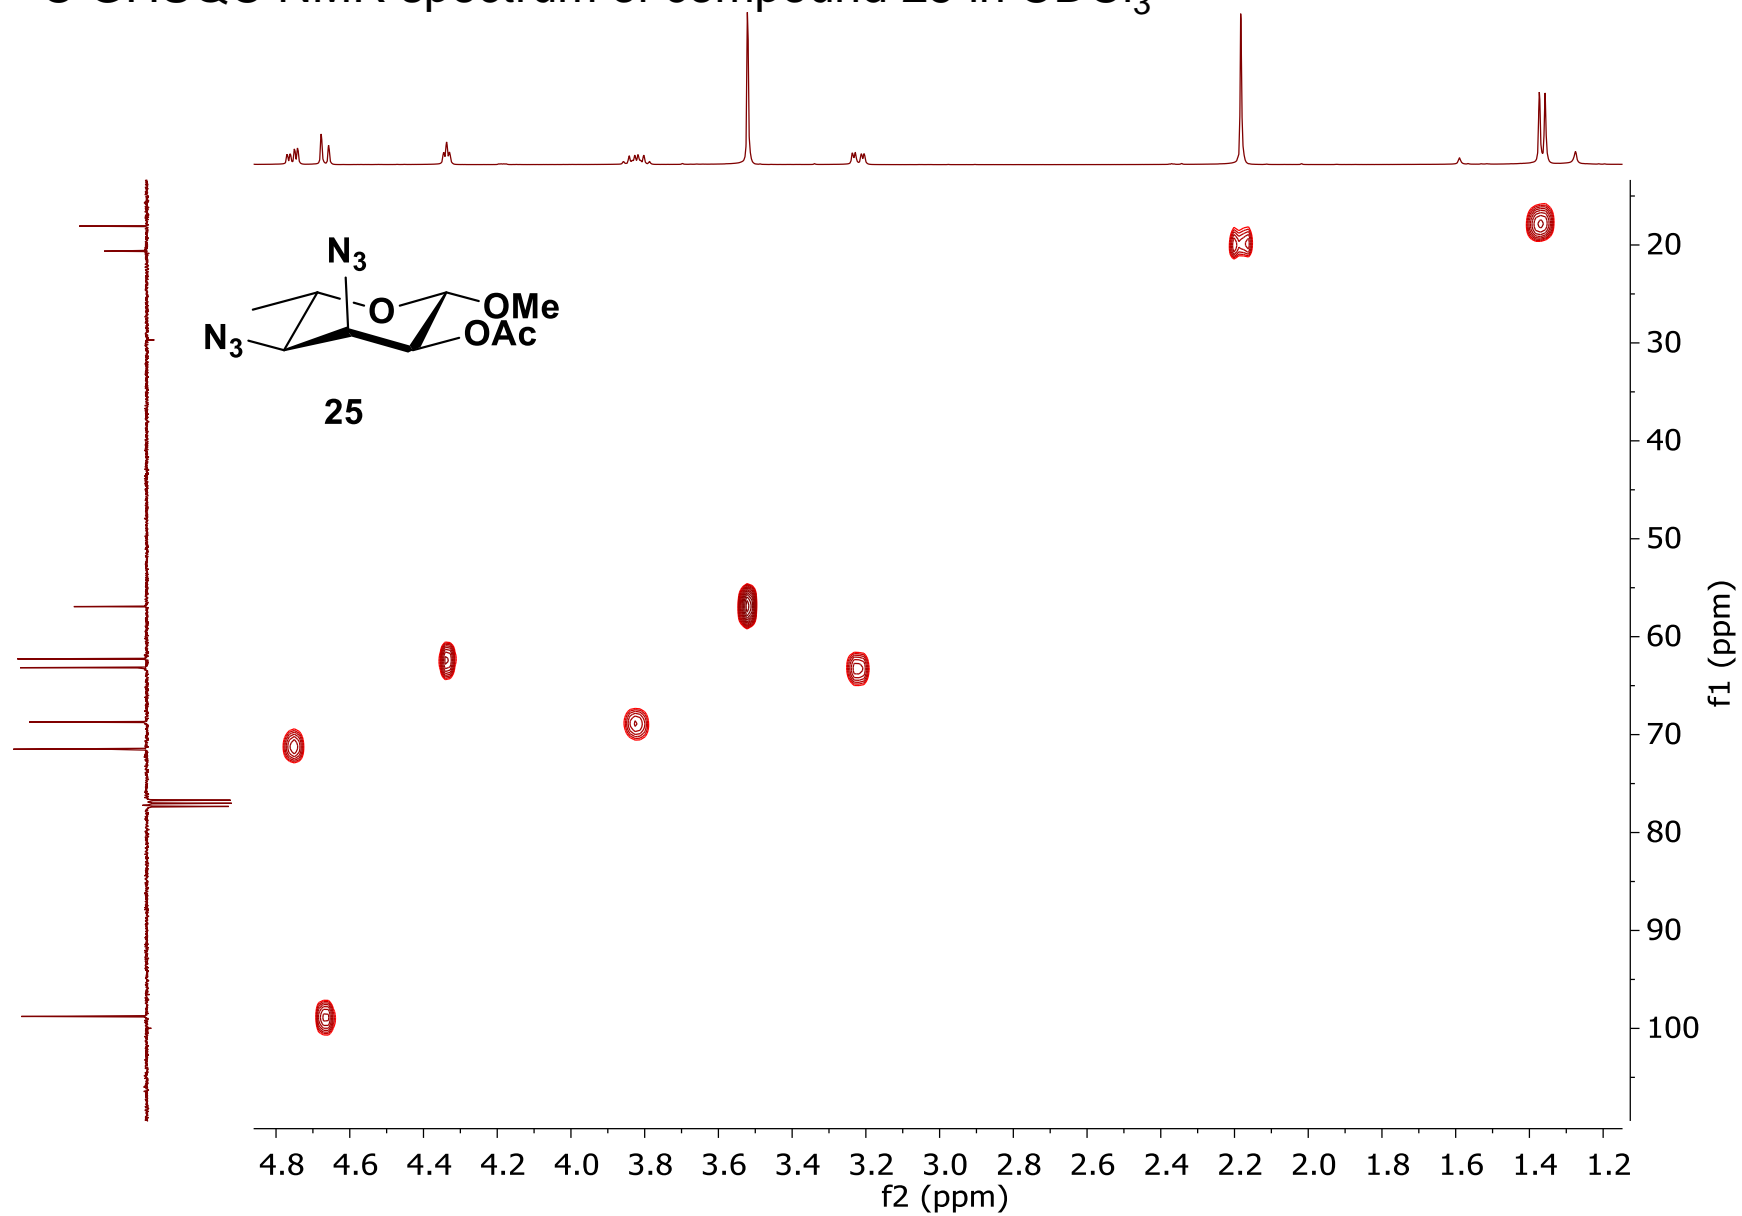

$^1\text{H}$  NMR spectrum of compound **26** in  $\text{CDCl}_3$  (400 MHz)

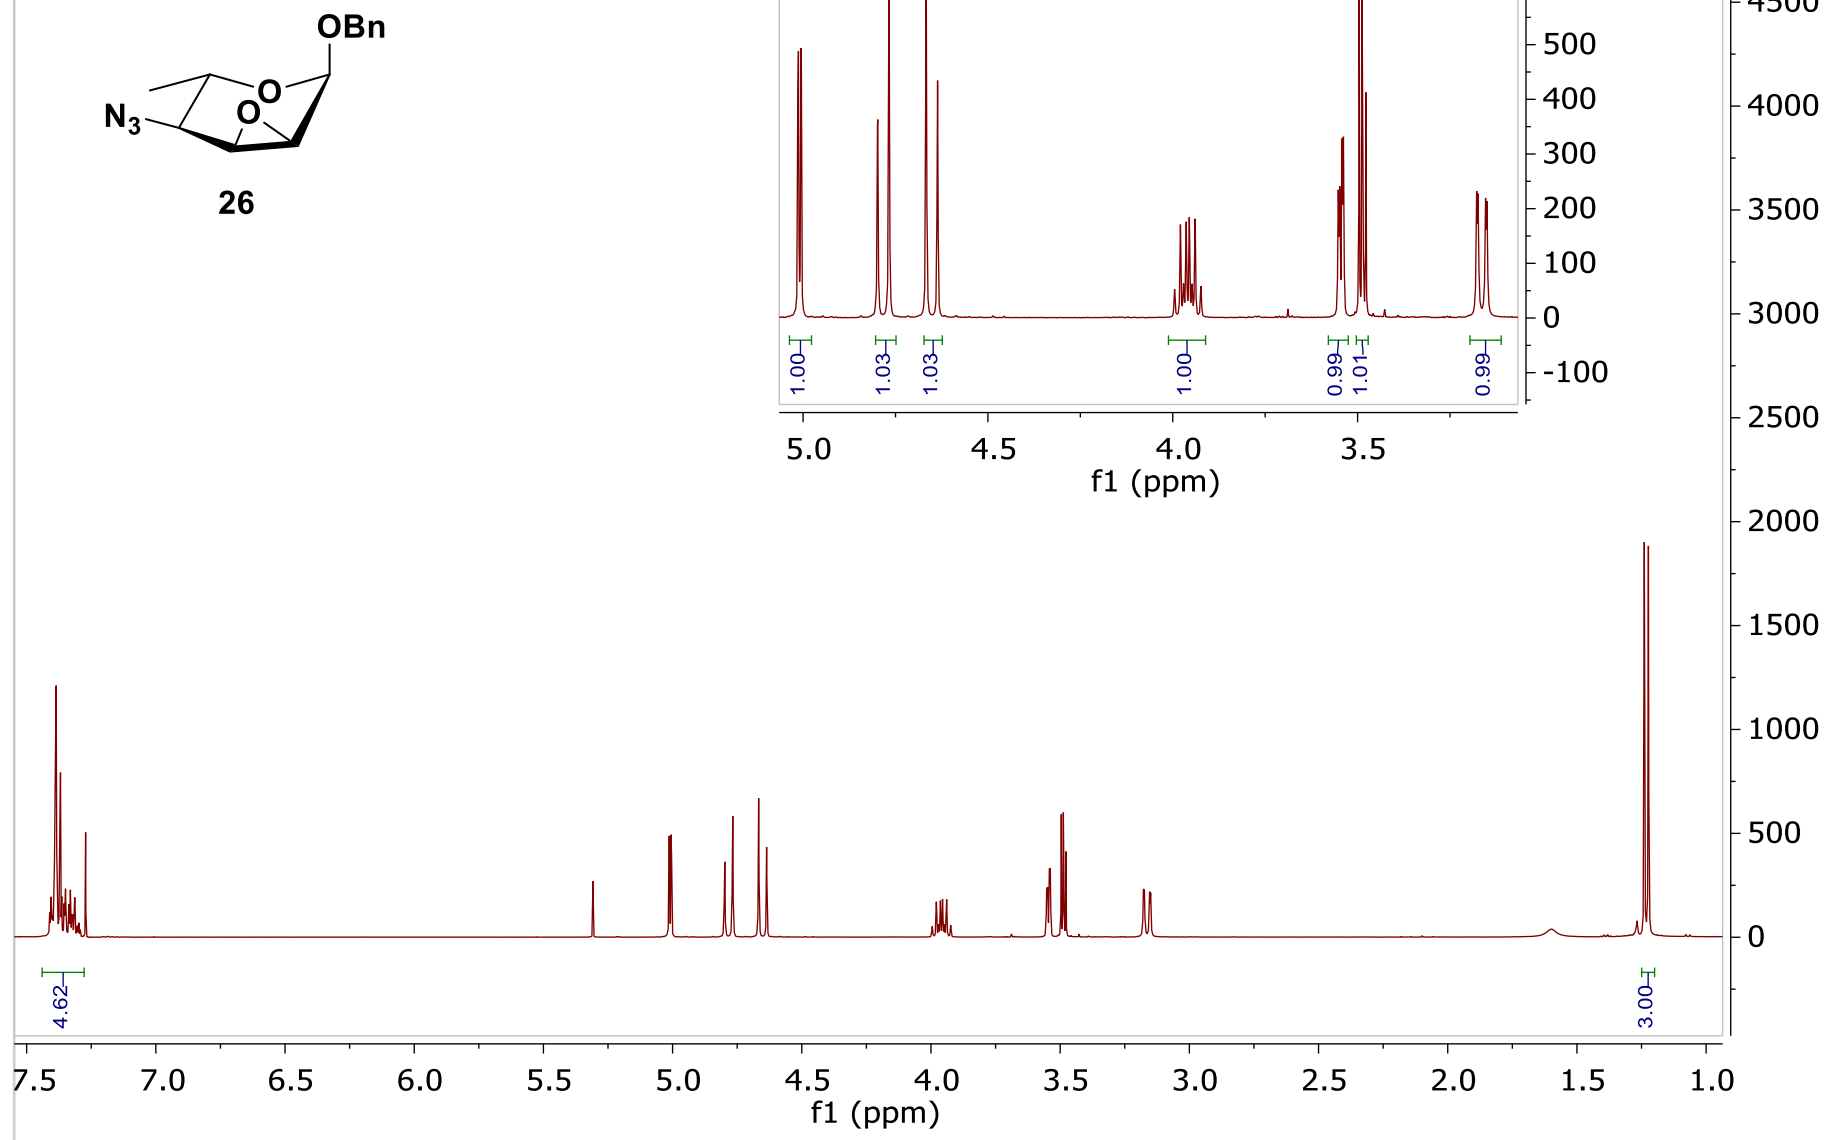

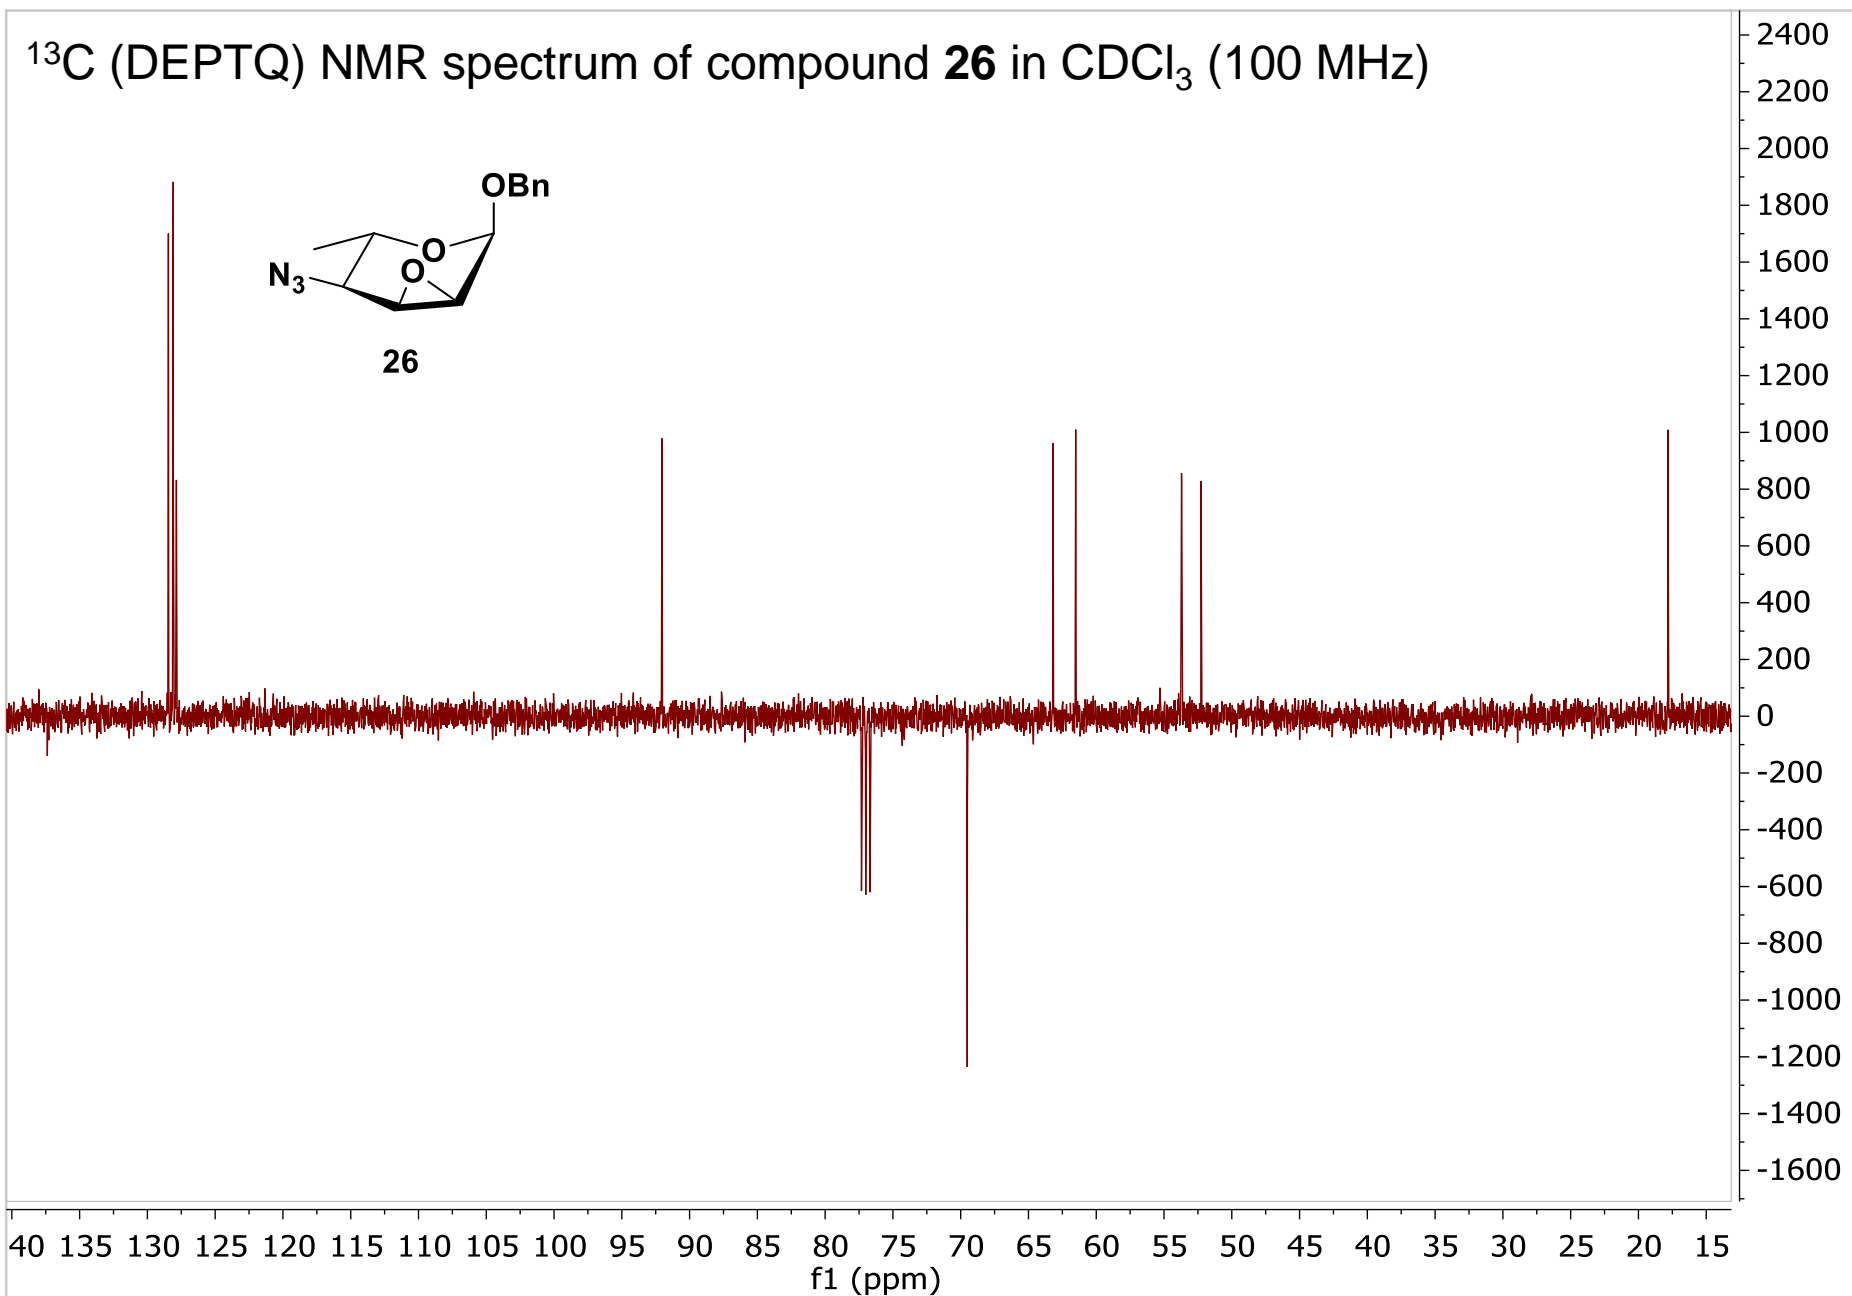

$^1\text{H}$ - $^1\text{H}$  GCOSY NMR spectrum of compound **26** in  $\text{CDCl}_3$

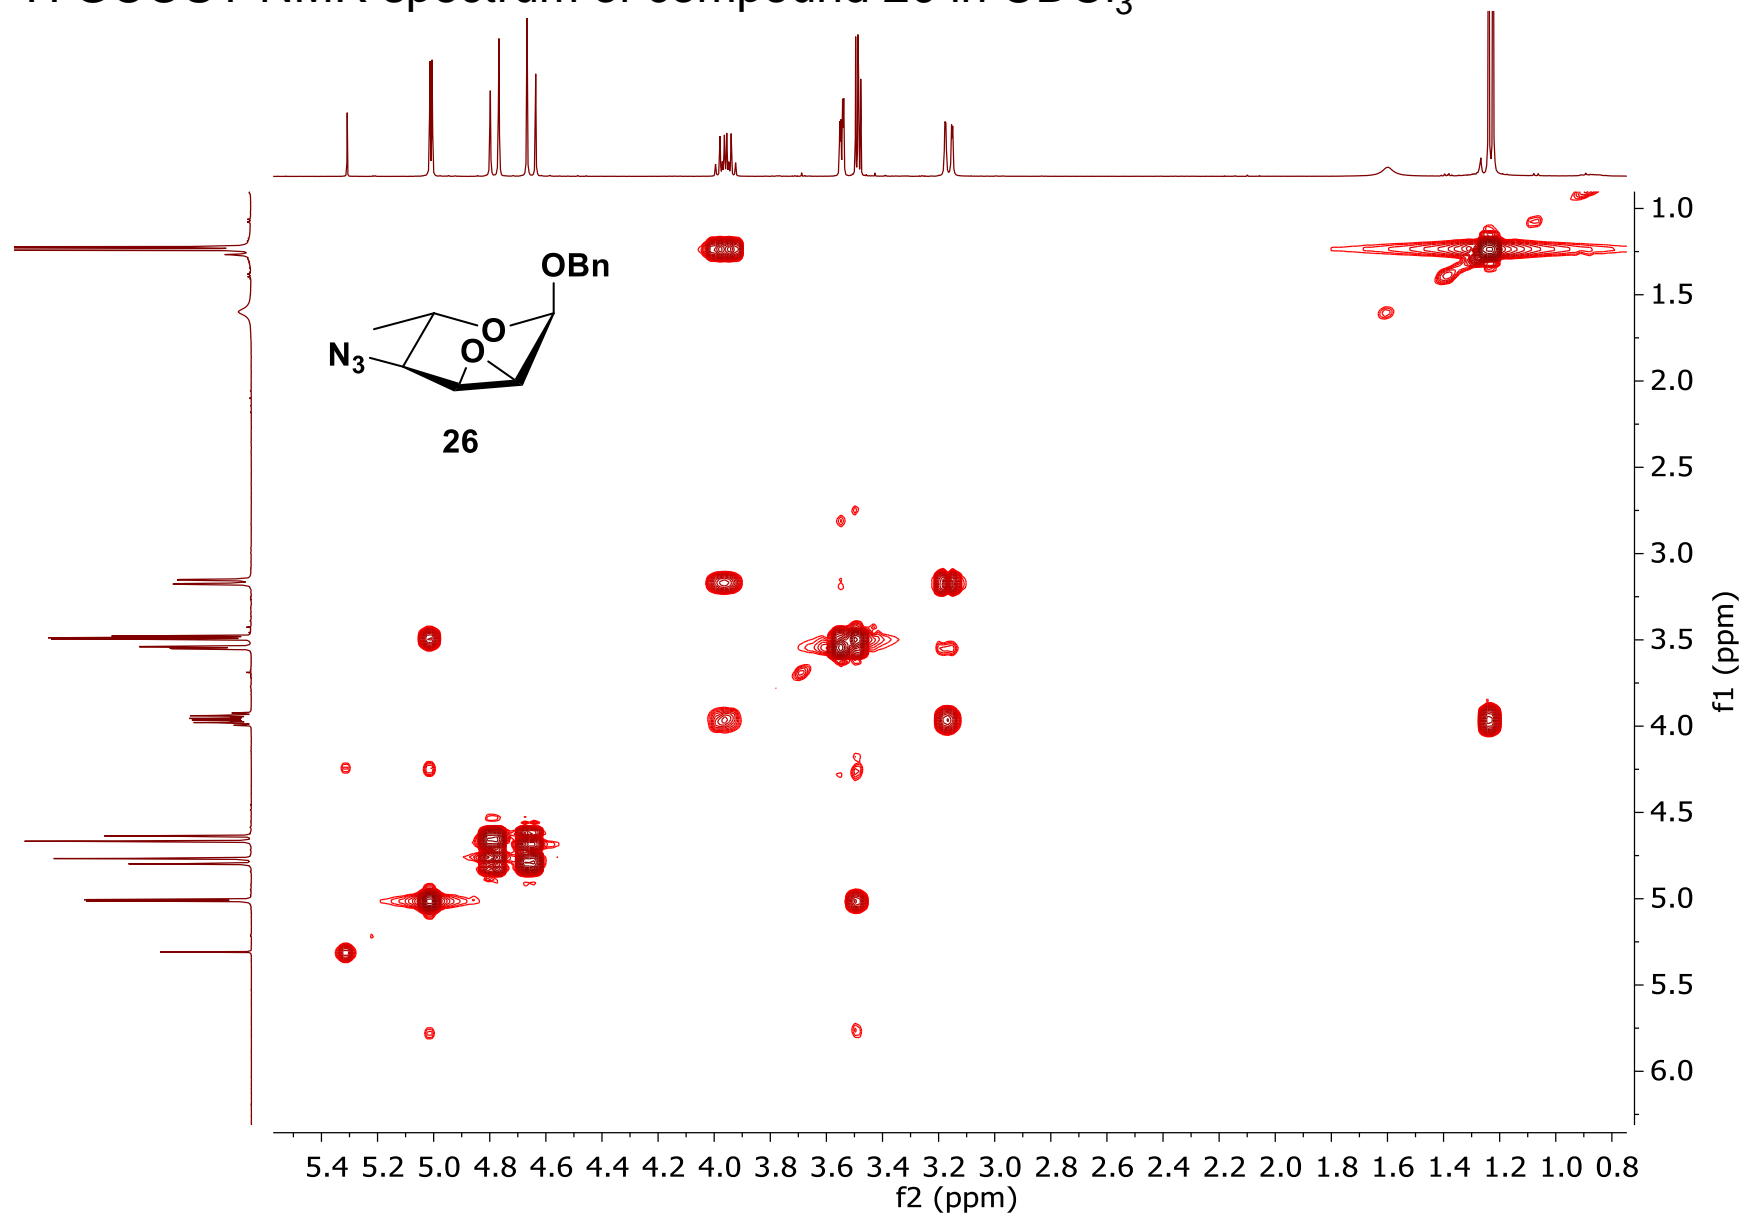

$^1\text{H}$ - $^{13}\text{C}$  GHSQC NMR spectrum of compound **26** in  $\text{CDCl}_3$

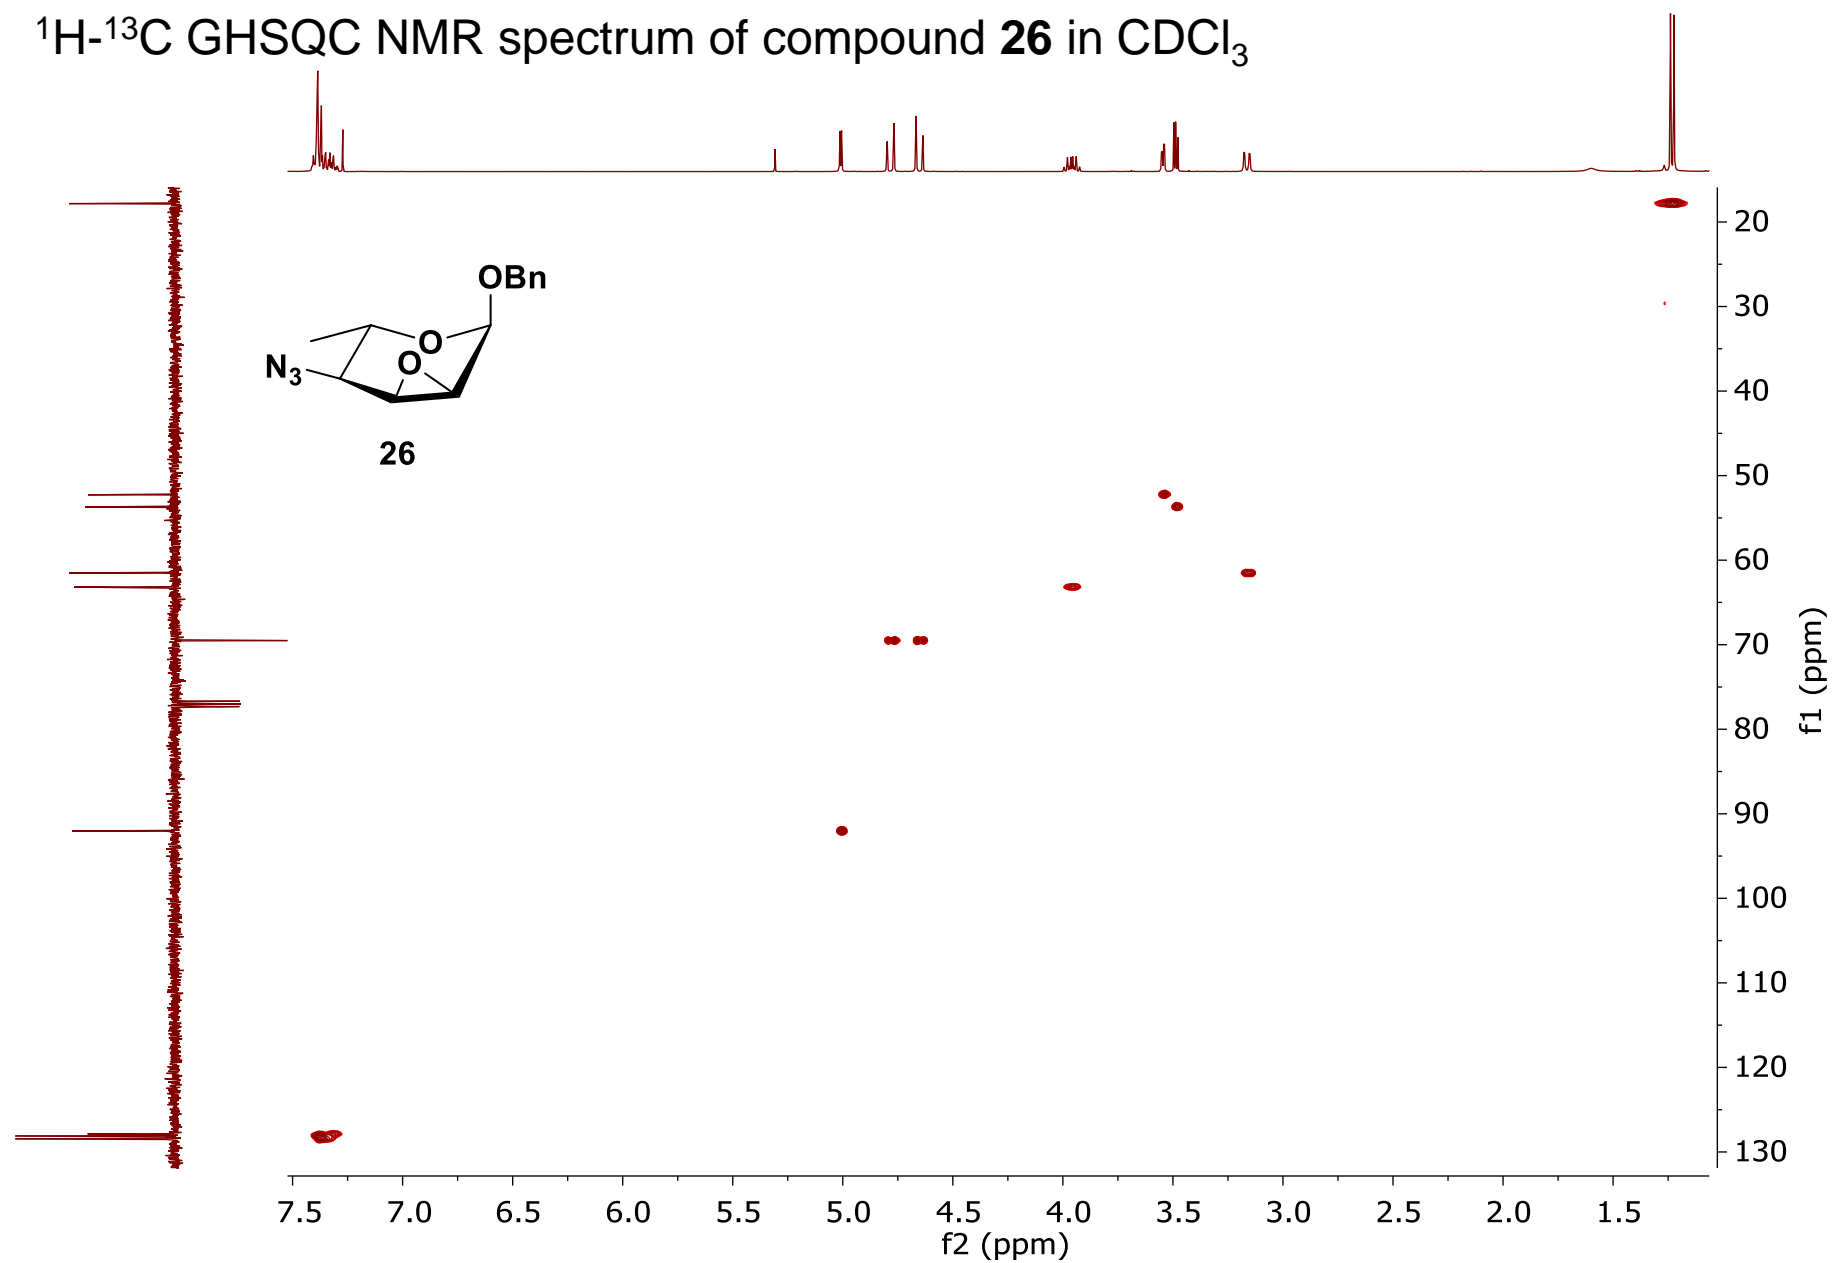

$^1\text{H}$  NMR spectrum of compound **27** in  $\text{CDCl}_3$  (400 MHz)

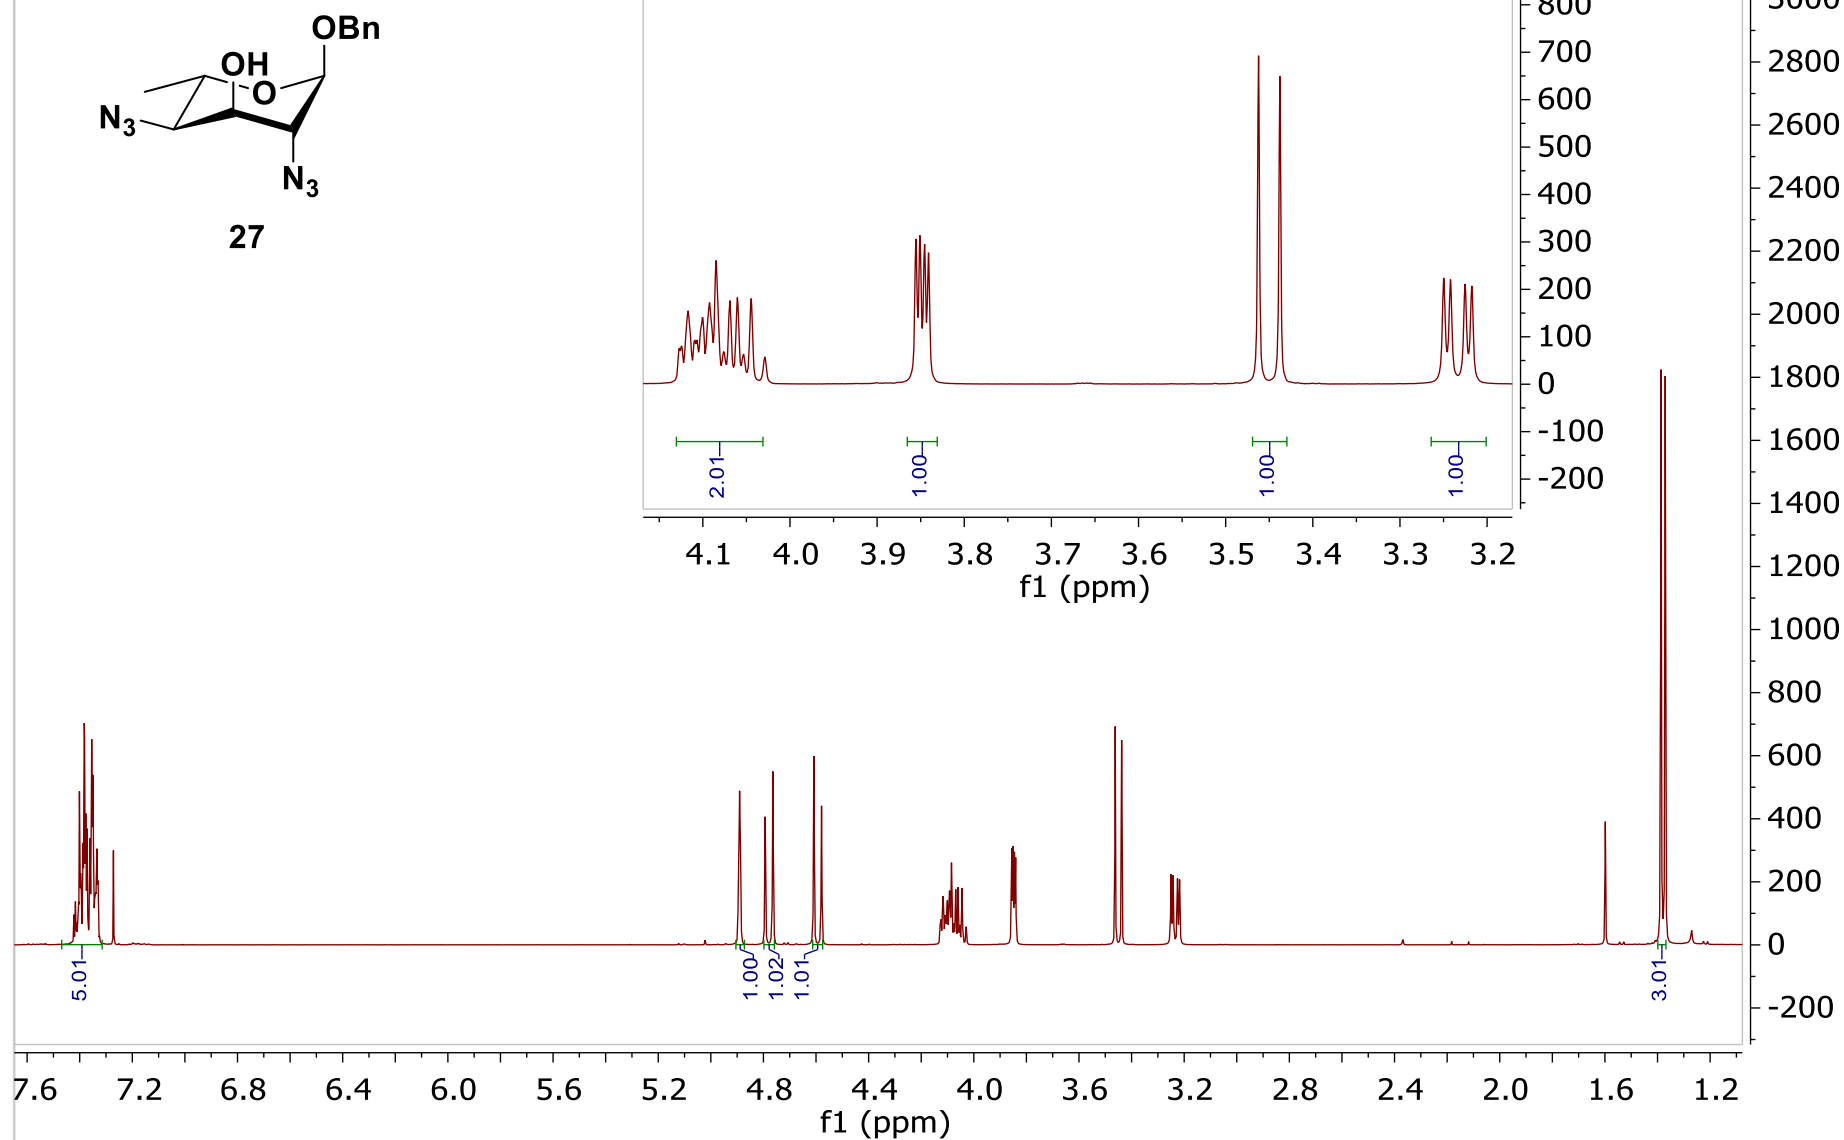

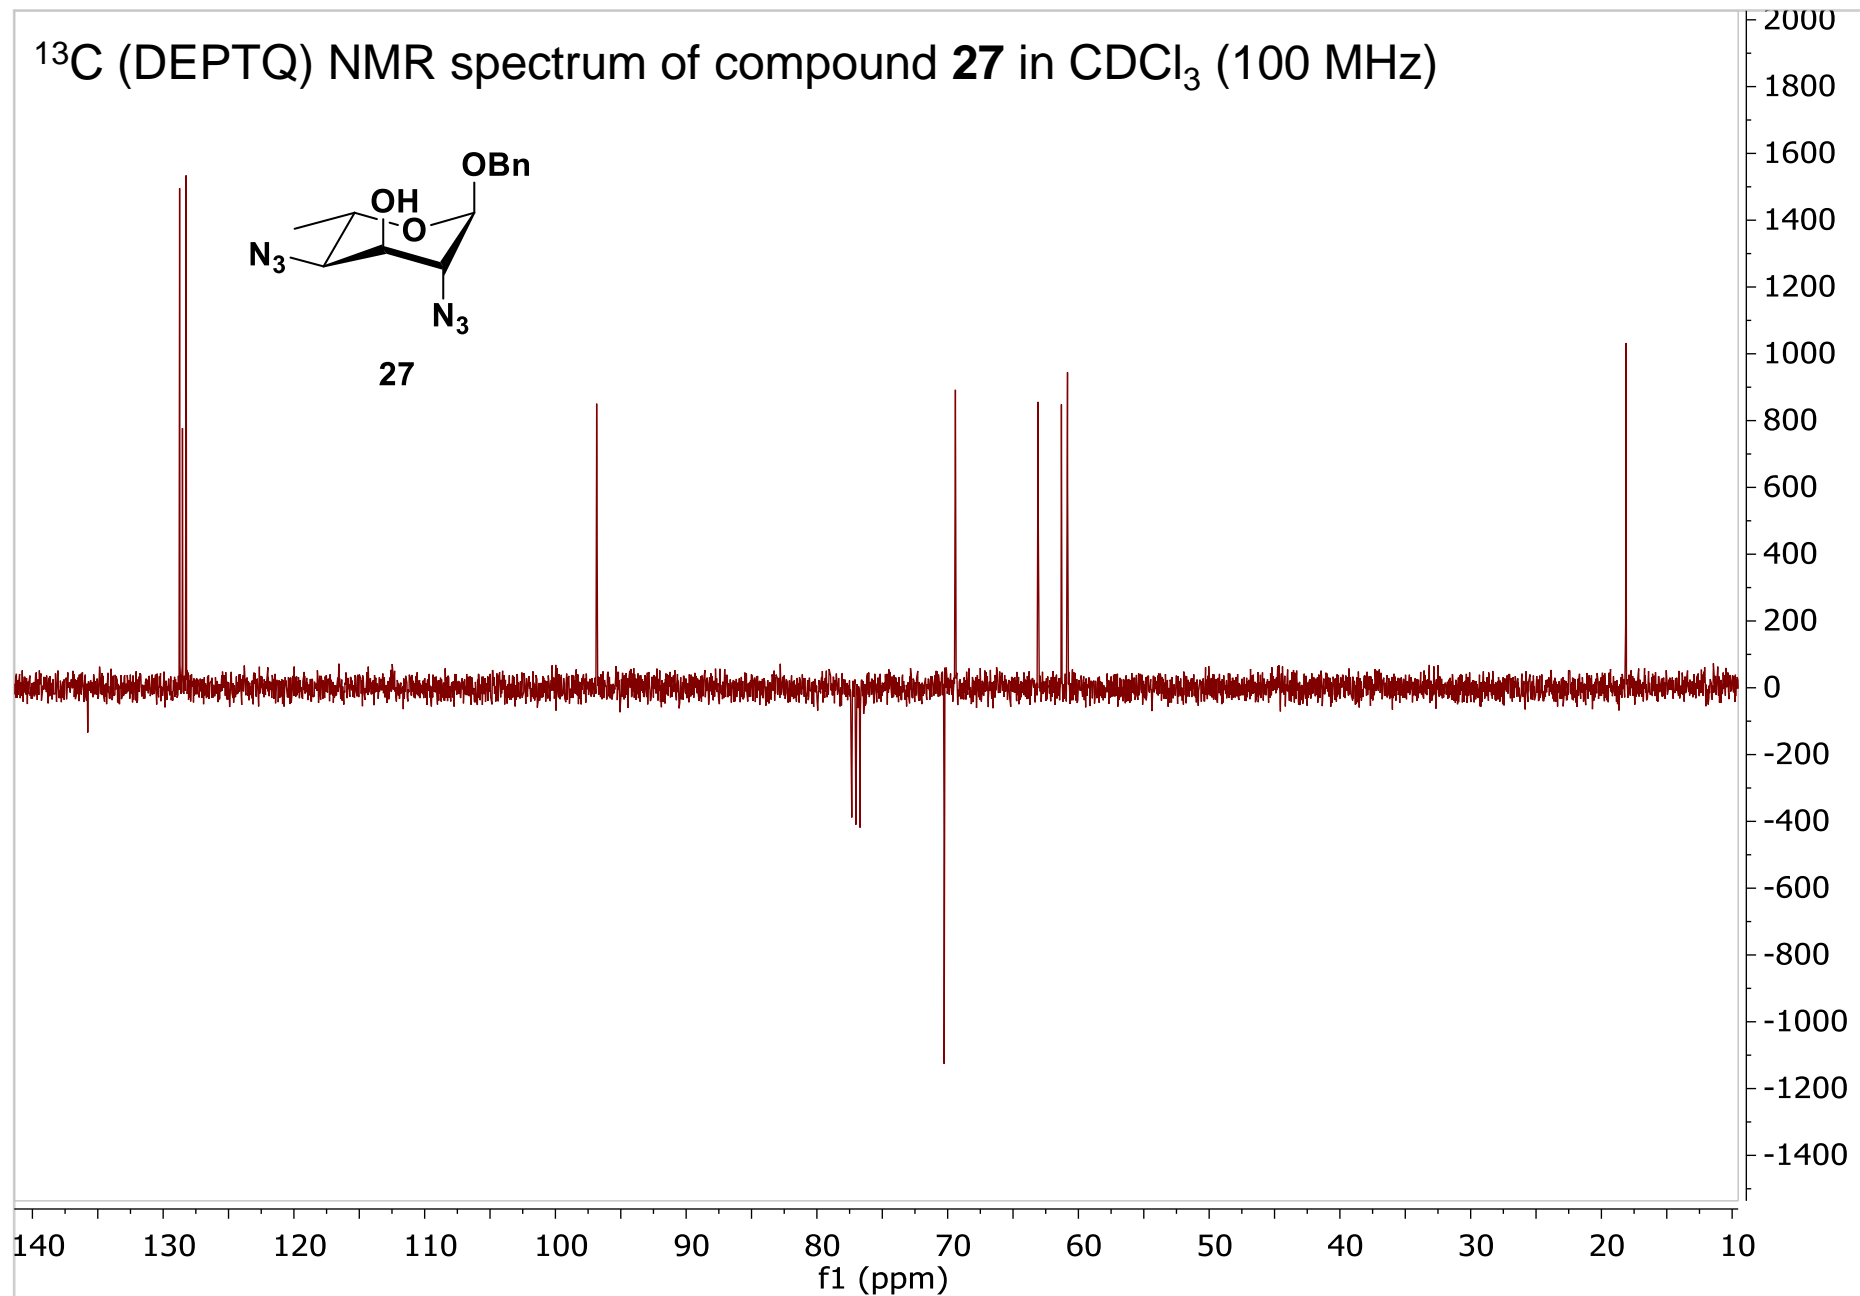



$^1\text{H}$ - $^1\text{H}$  GCOSY NMR spectrum of compound **27** in  $\text{CDCl}_3$

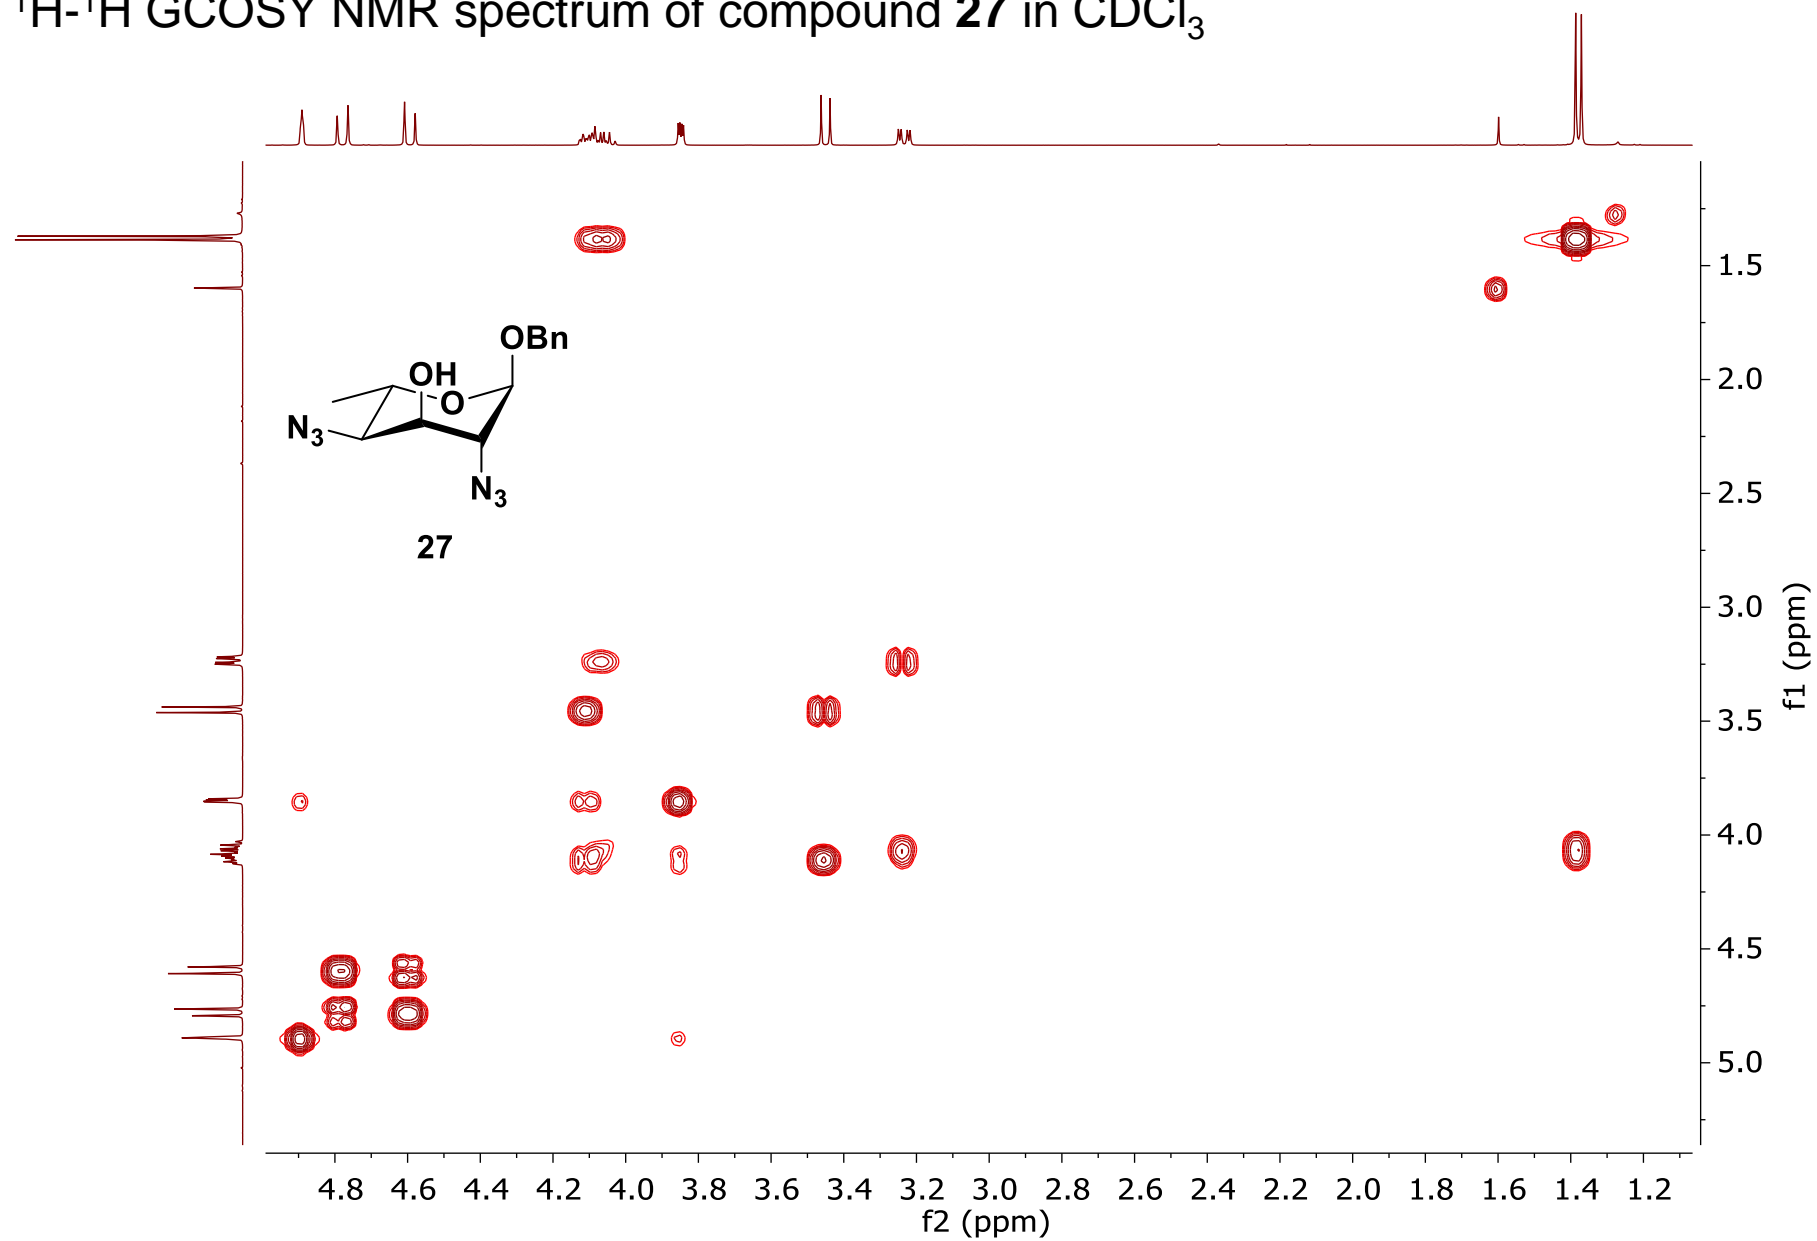

$^1\text{H}$ - $^{13}\text{C}$  GHSQC NMR spectrum of compound **27** in  $\text{CDCl}_3$

Chemical structure of compound **27** is shown in the upper left corner. The structure is a bicyclic molecule with an azide group ( $\text{N}_3$ ) at C1, a hydroxyl group ( $\text{OH}$ ) at C2, and a benzyl ether group ( $\text{OBn}$ ) at C3. The azide group is also labeled  $\text{N}_3$ . The compound is labeled **27**.

The GHSQC spectrum displays correlations between  $^1\text{H}$  (horizontal axis,  $f_2$  in ppm) and  $^{13}\text{C}$  (vertical axis,  $f_1$  in ppm) chemical shifts. The  $^1\text{H}$  spectrum is shown along the top, and the  $^{13}\text{C}$  spectrum is shown along the left side. The main plot area shows cross-peaks indicating the assignment of  $^{13}\text{C}$  signals to specific  $^1\text{H}$  signals.

Key features of the spectrum include:

- Aromatic region ( $^1\text{H}$  7.0-7.5 ppm,  $^{13}\text{C}$  120-140 ppm): Cross-peaks corresponding to the benzyl ether group ( $\text{OBn}$ ).
- Aliphatic region ( $^1\text{H}$  3.0-4.5 ppm,  $^{13}\text{C}$  40-60 ppm): Cross-peaks corresponding to the sugar ring carbons and the benzyl group.
- Acetal region ( $^1\text{H}$  4.5-5.5 ppm,  $^{13}\text{C}$  70-80 ppm): Cross-peaks corresponding to the acetal carbons.

$^1\text{H}$  NMR spectrum of compound **28** in  $\text{CDCl}_3$  (400 MHz)

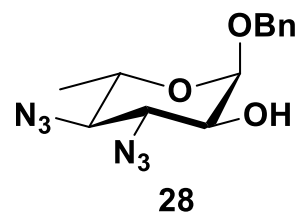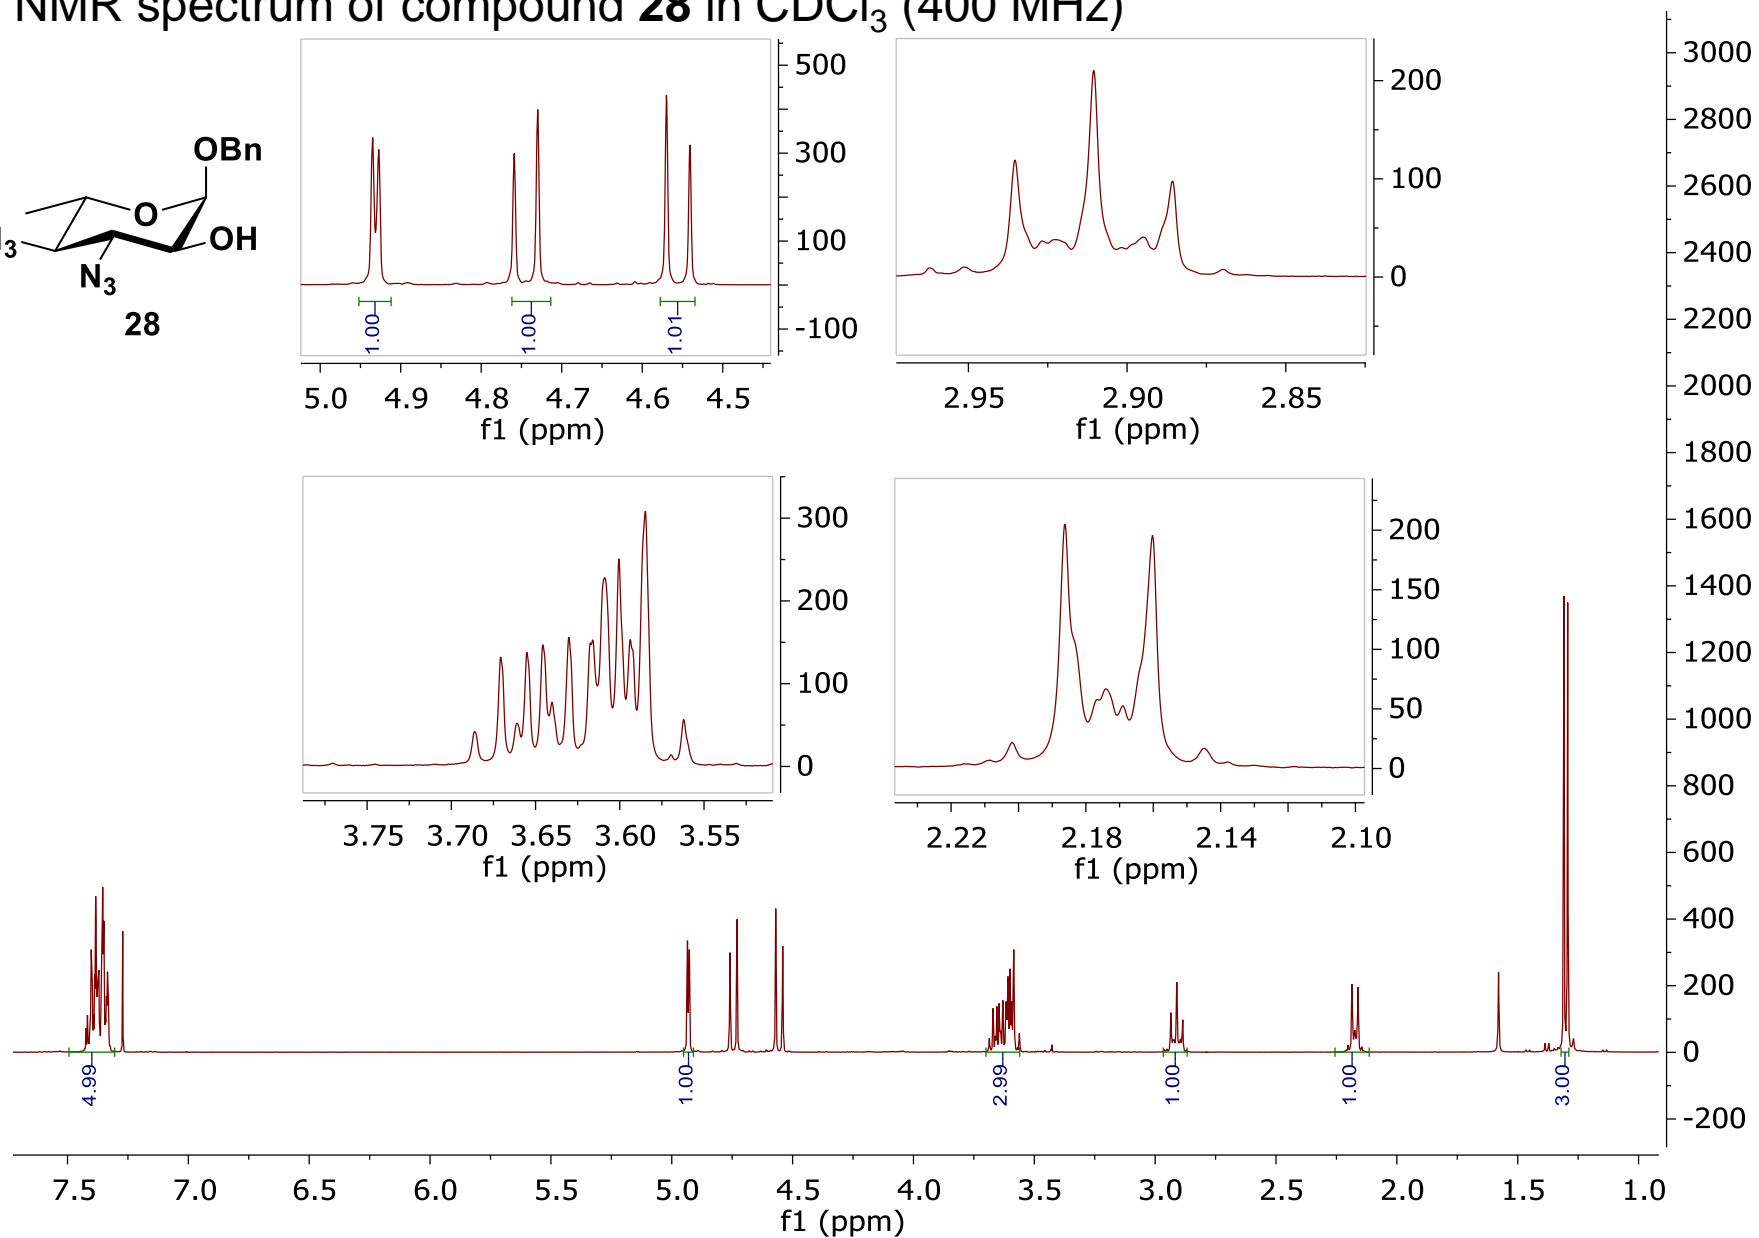

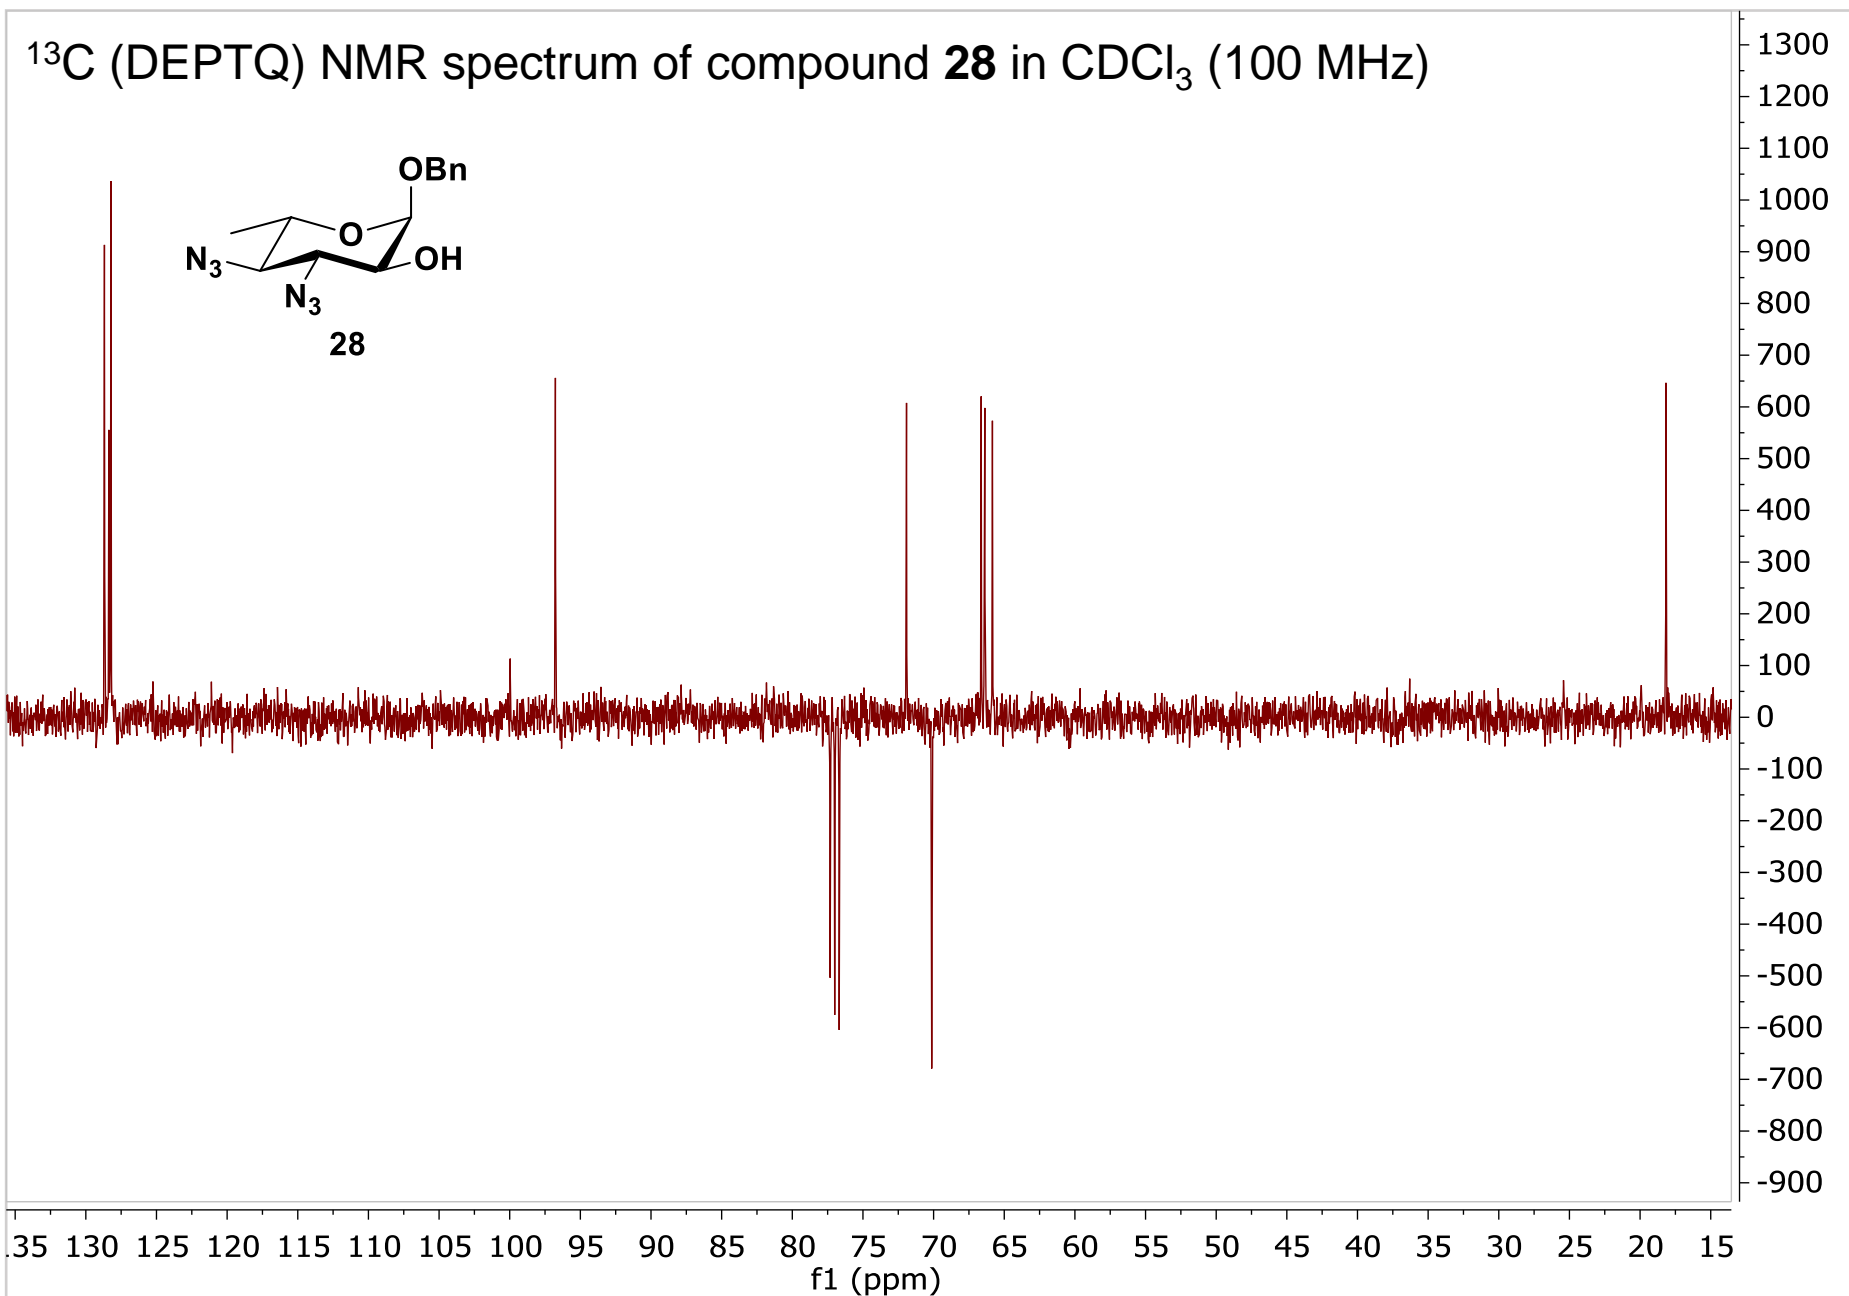

$^1\text{H}$ - $^1\text{H}$  GCOSY NMR spectrum of compound **28** in  $\text{CDCl}_3$

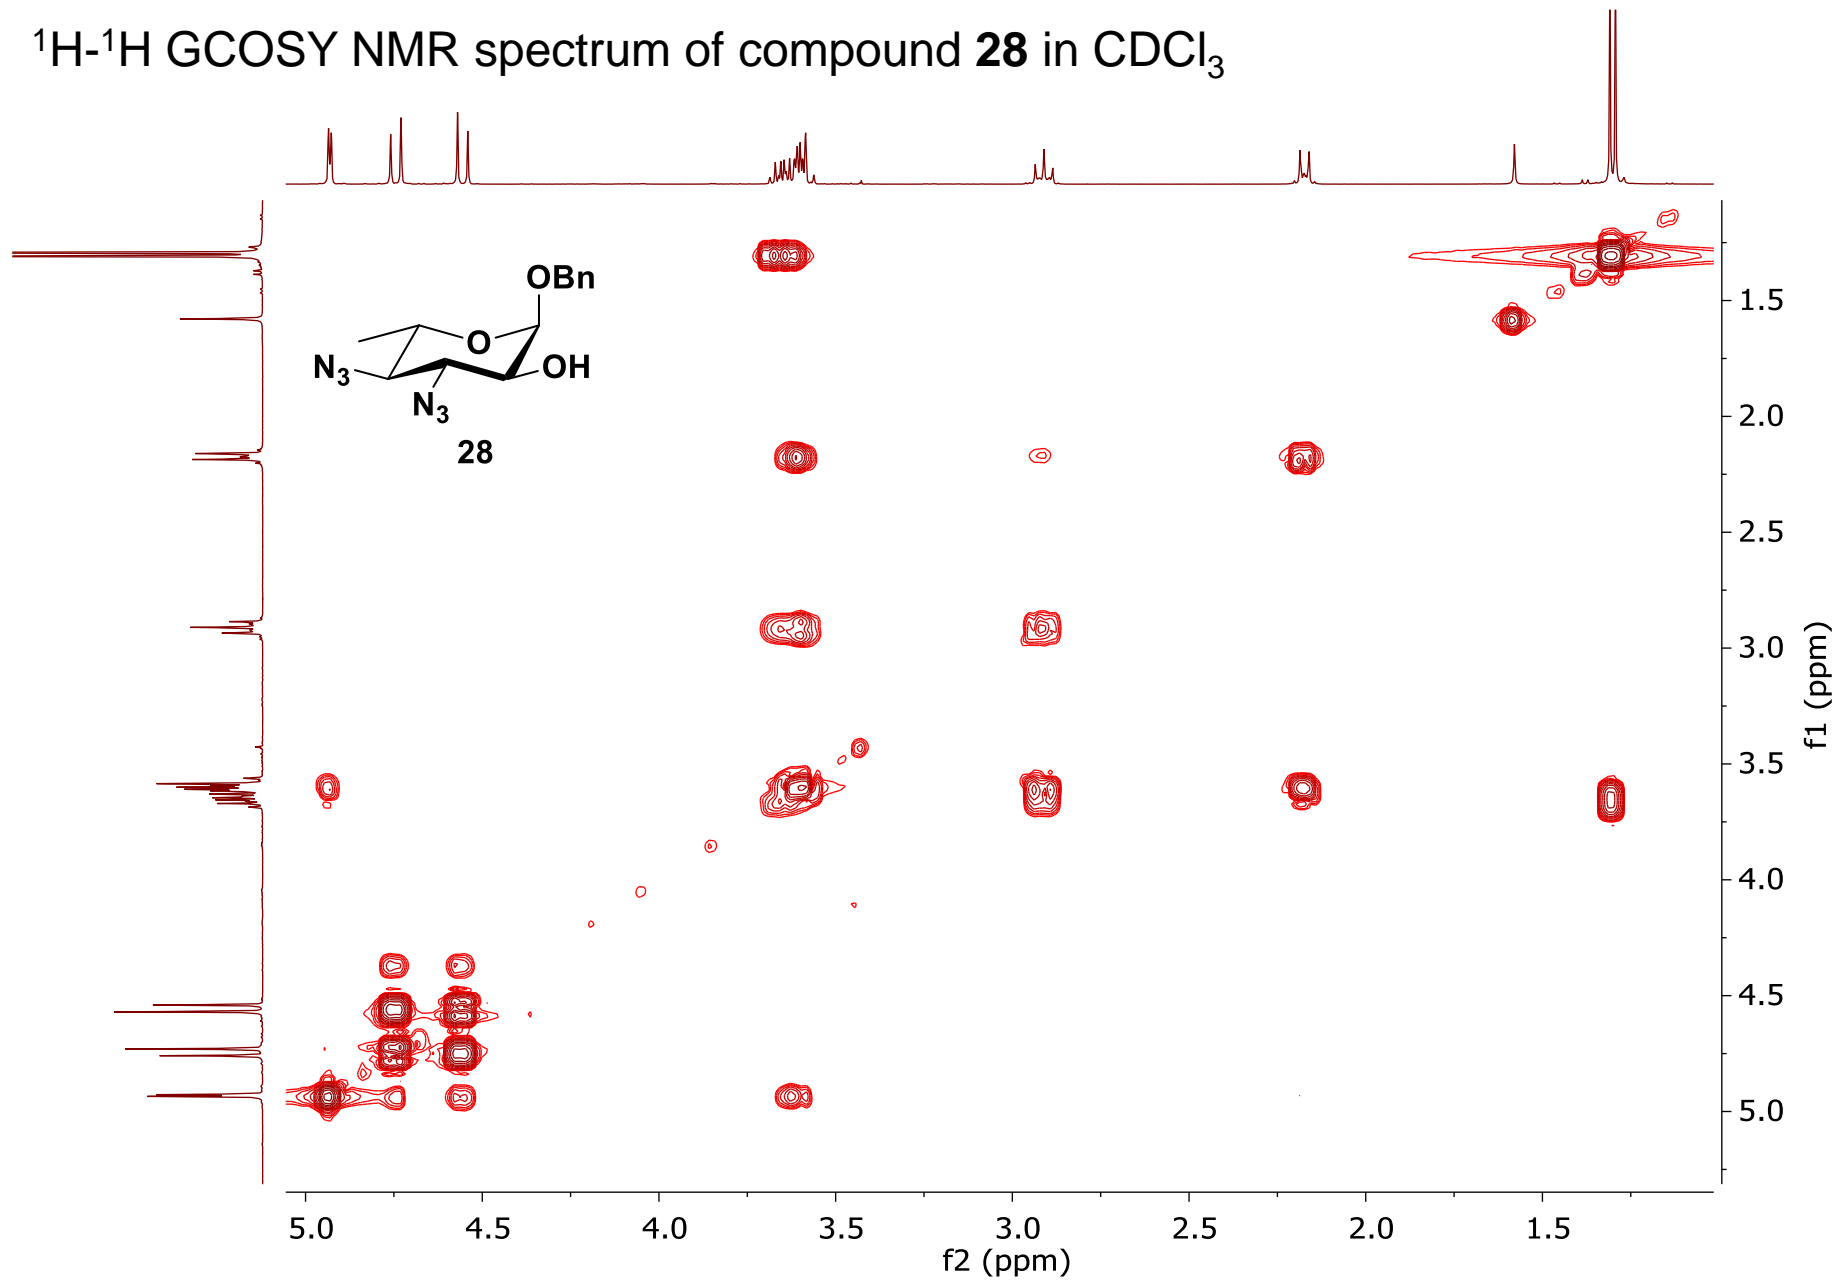

$^1\text{H}$ - $^{13}\text{C}$  GHSQC NMR spectrum of compound **28** in  $\text{CDCl}_3$

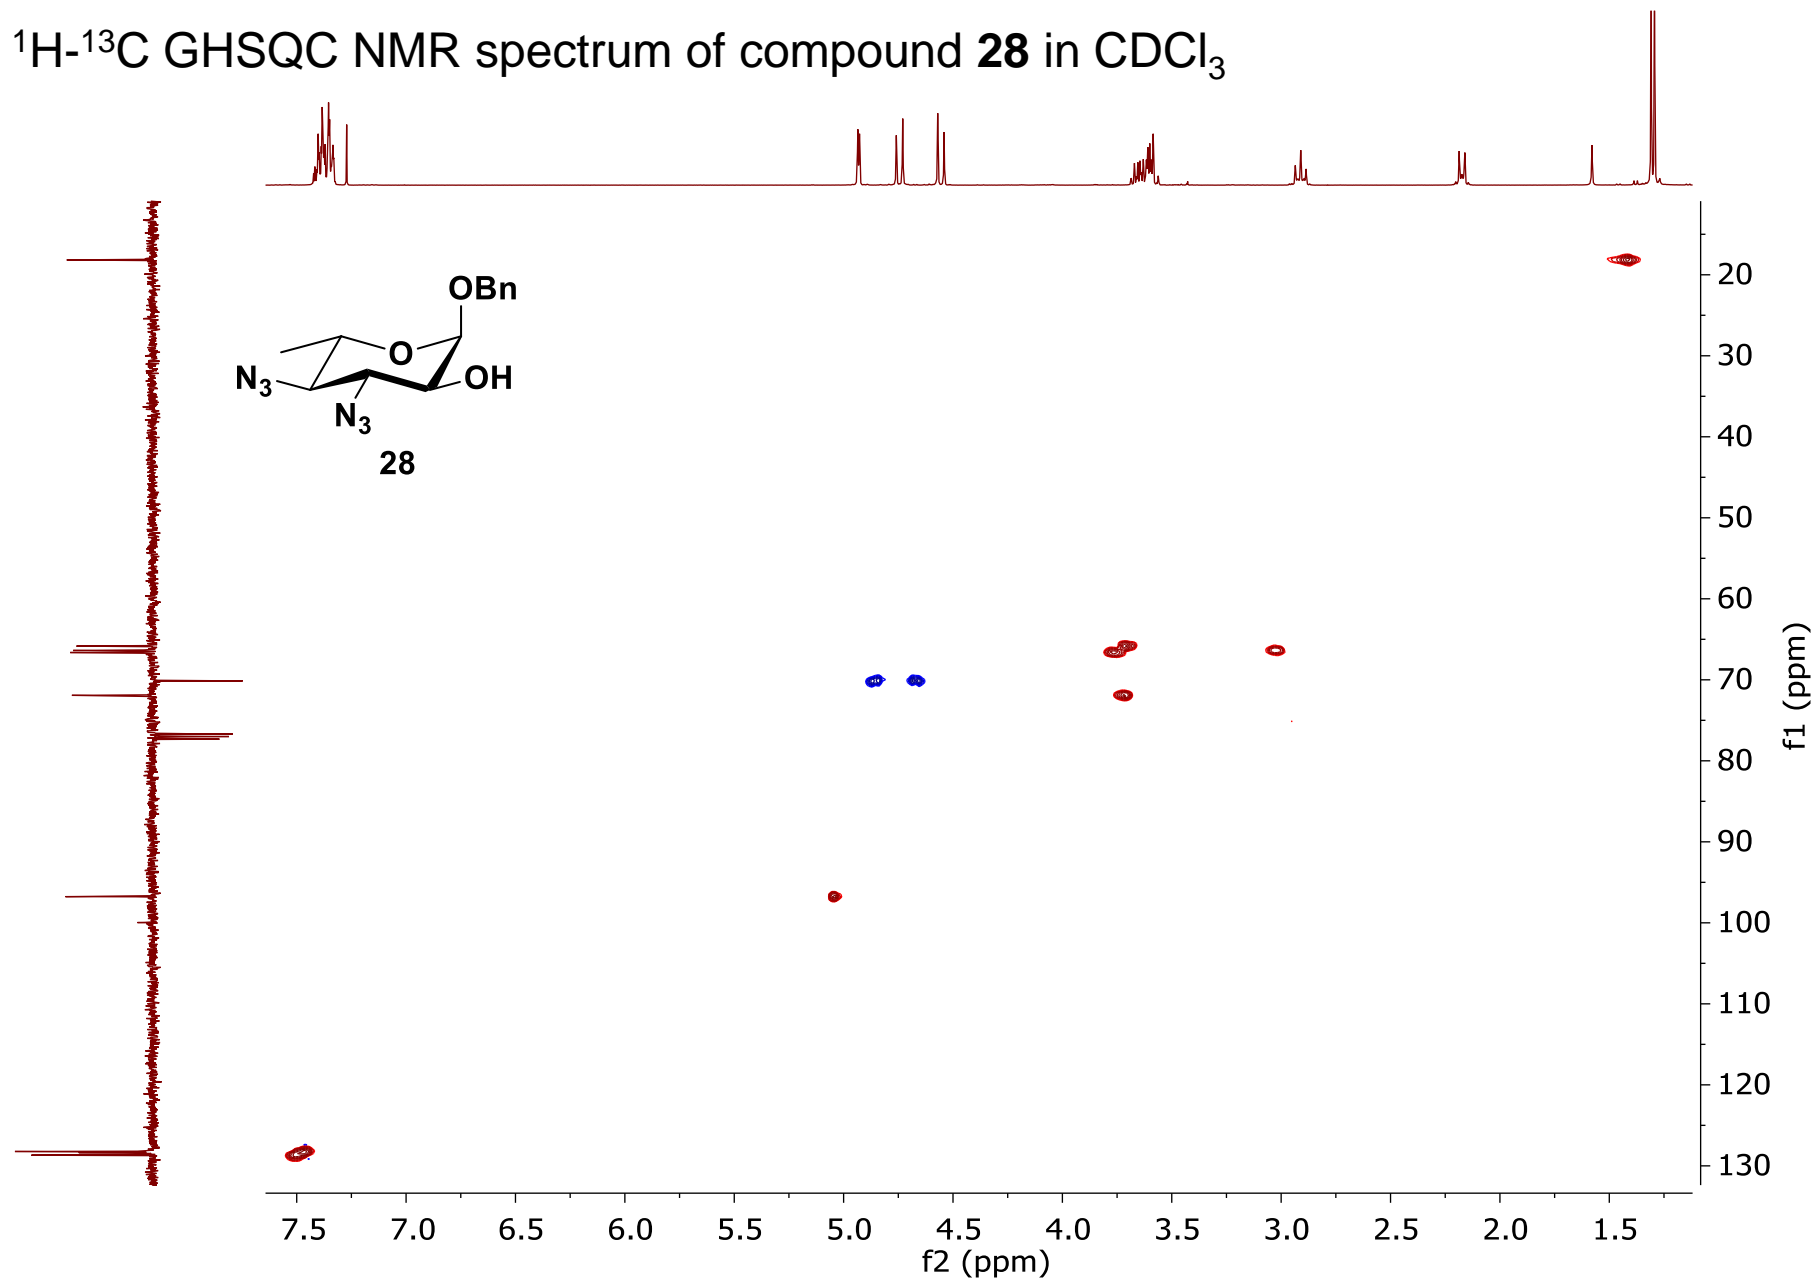

$^1\text{H}$  NMR spectrum of compound **29** in  $\text{CDCl}_3$  (400 MHz)

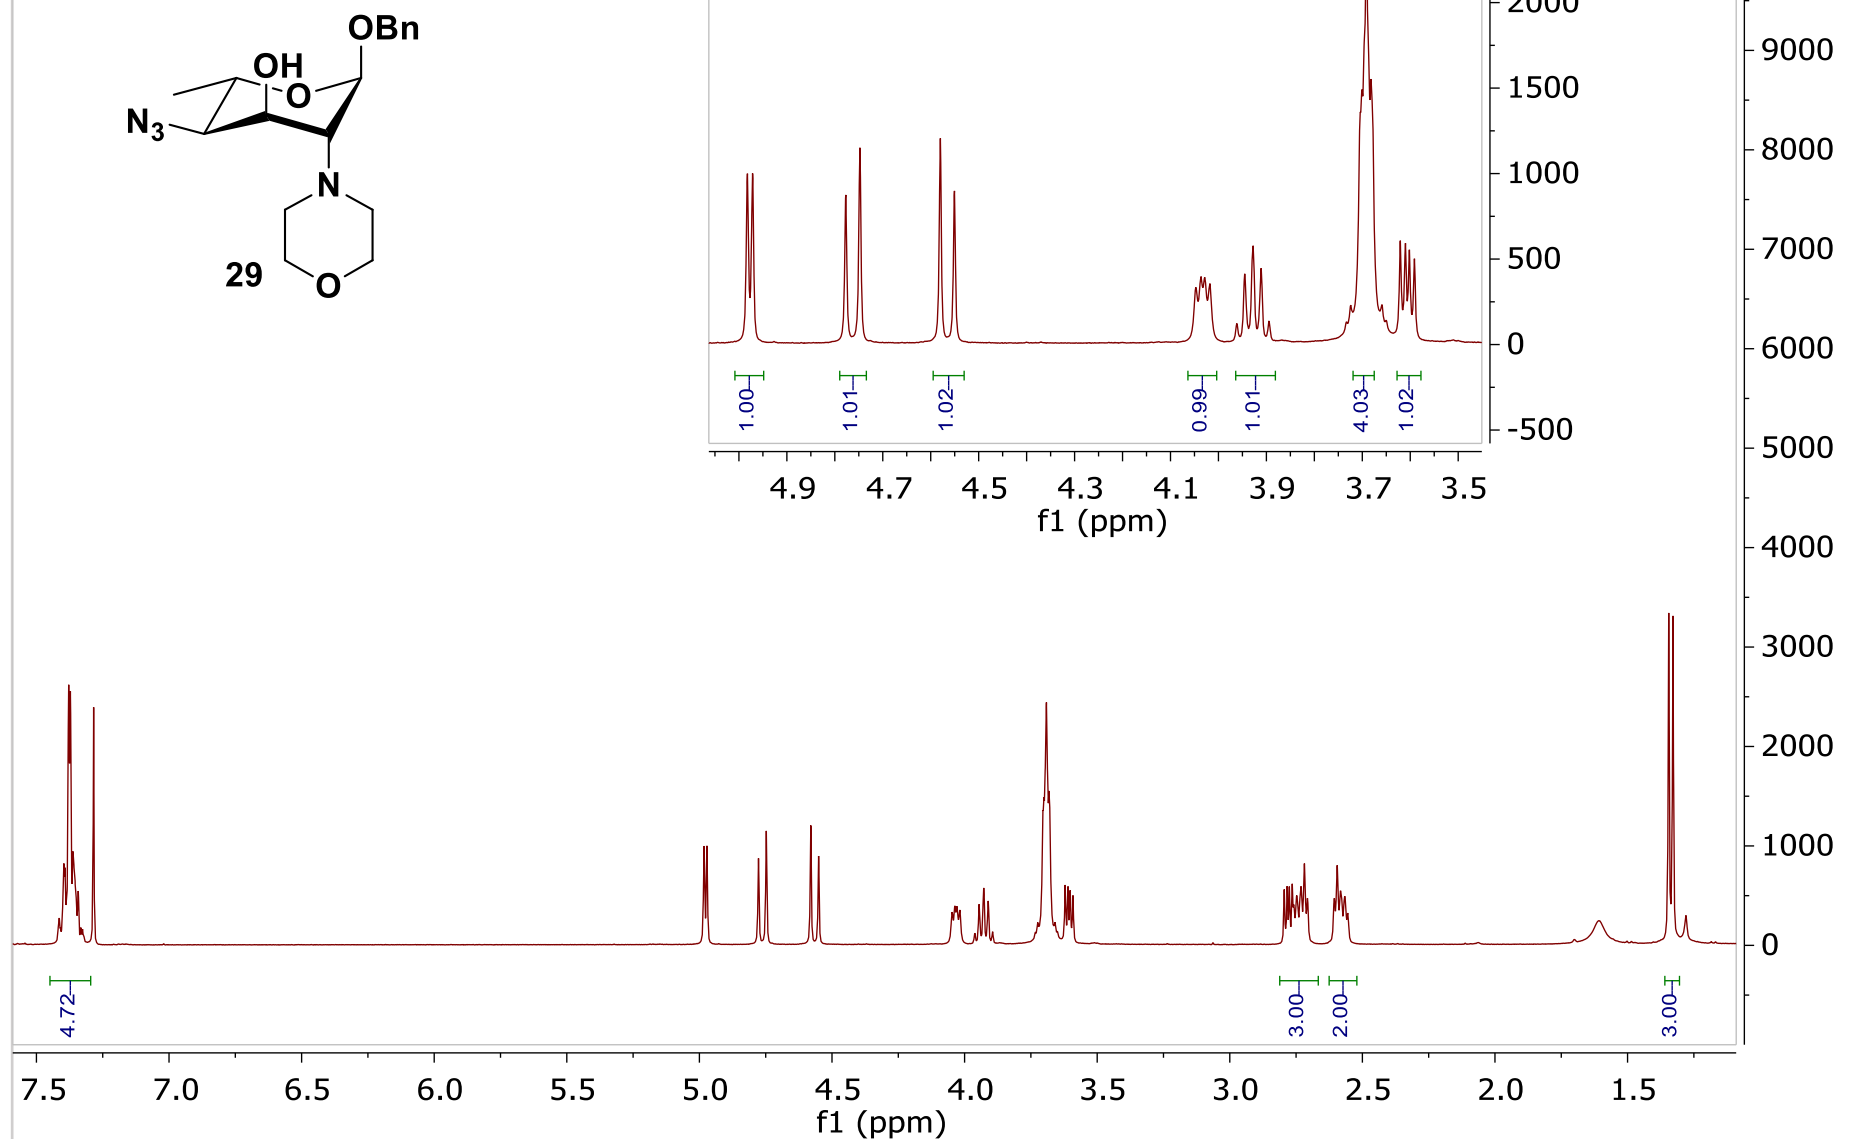

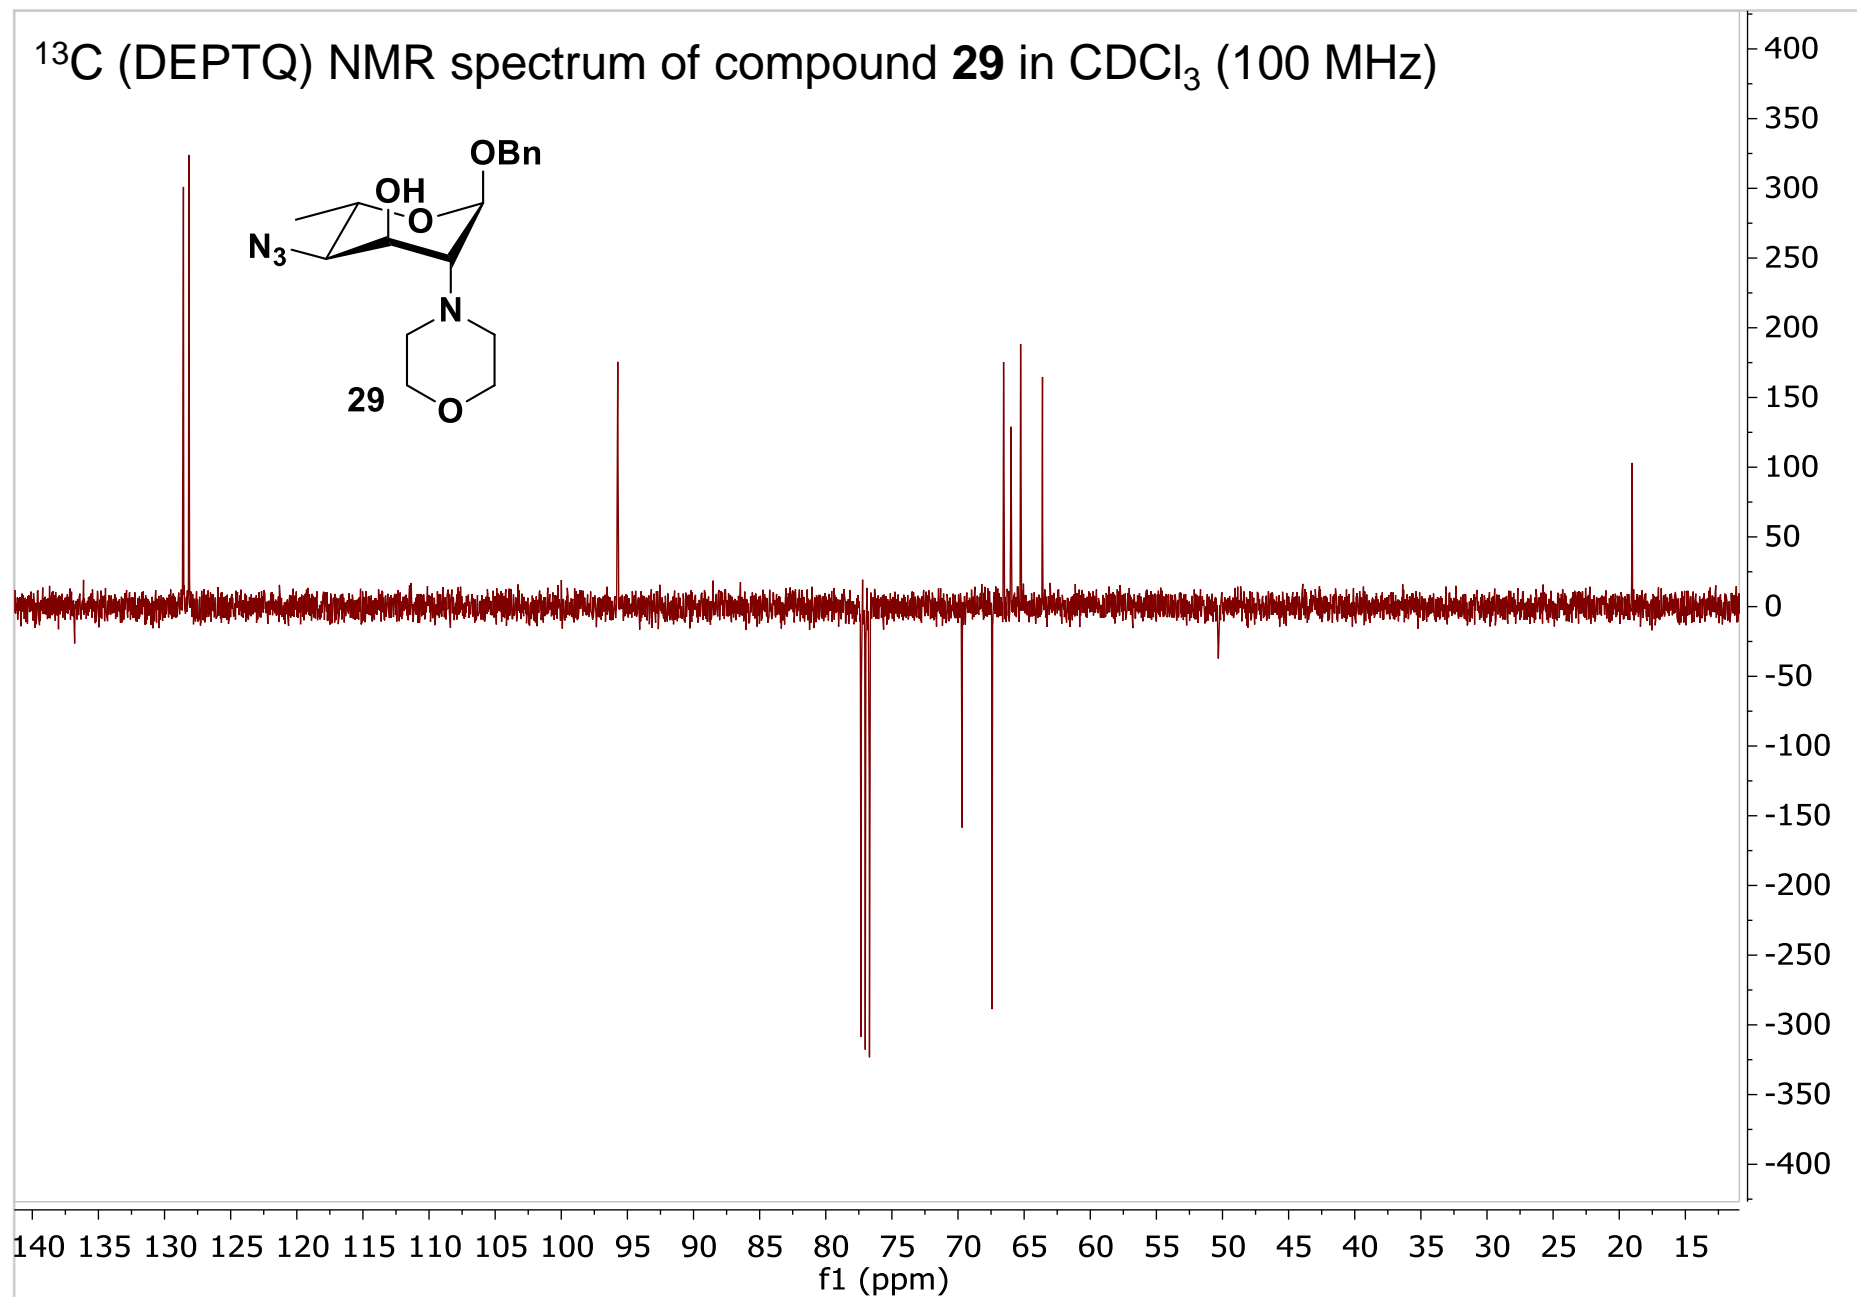



$^1\text{H}$ - $^1\text{H}$  GCOSY NMR spectrum of compound **29** in  $\text{CDCl}_3$

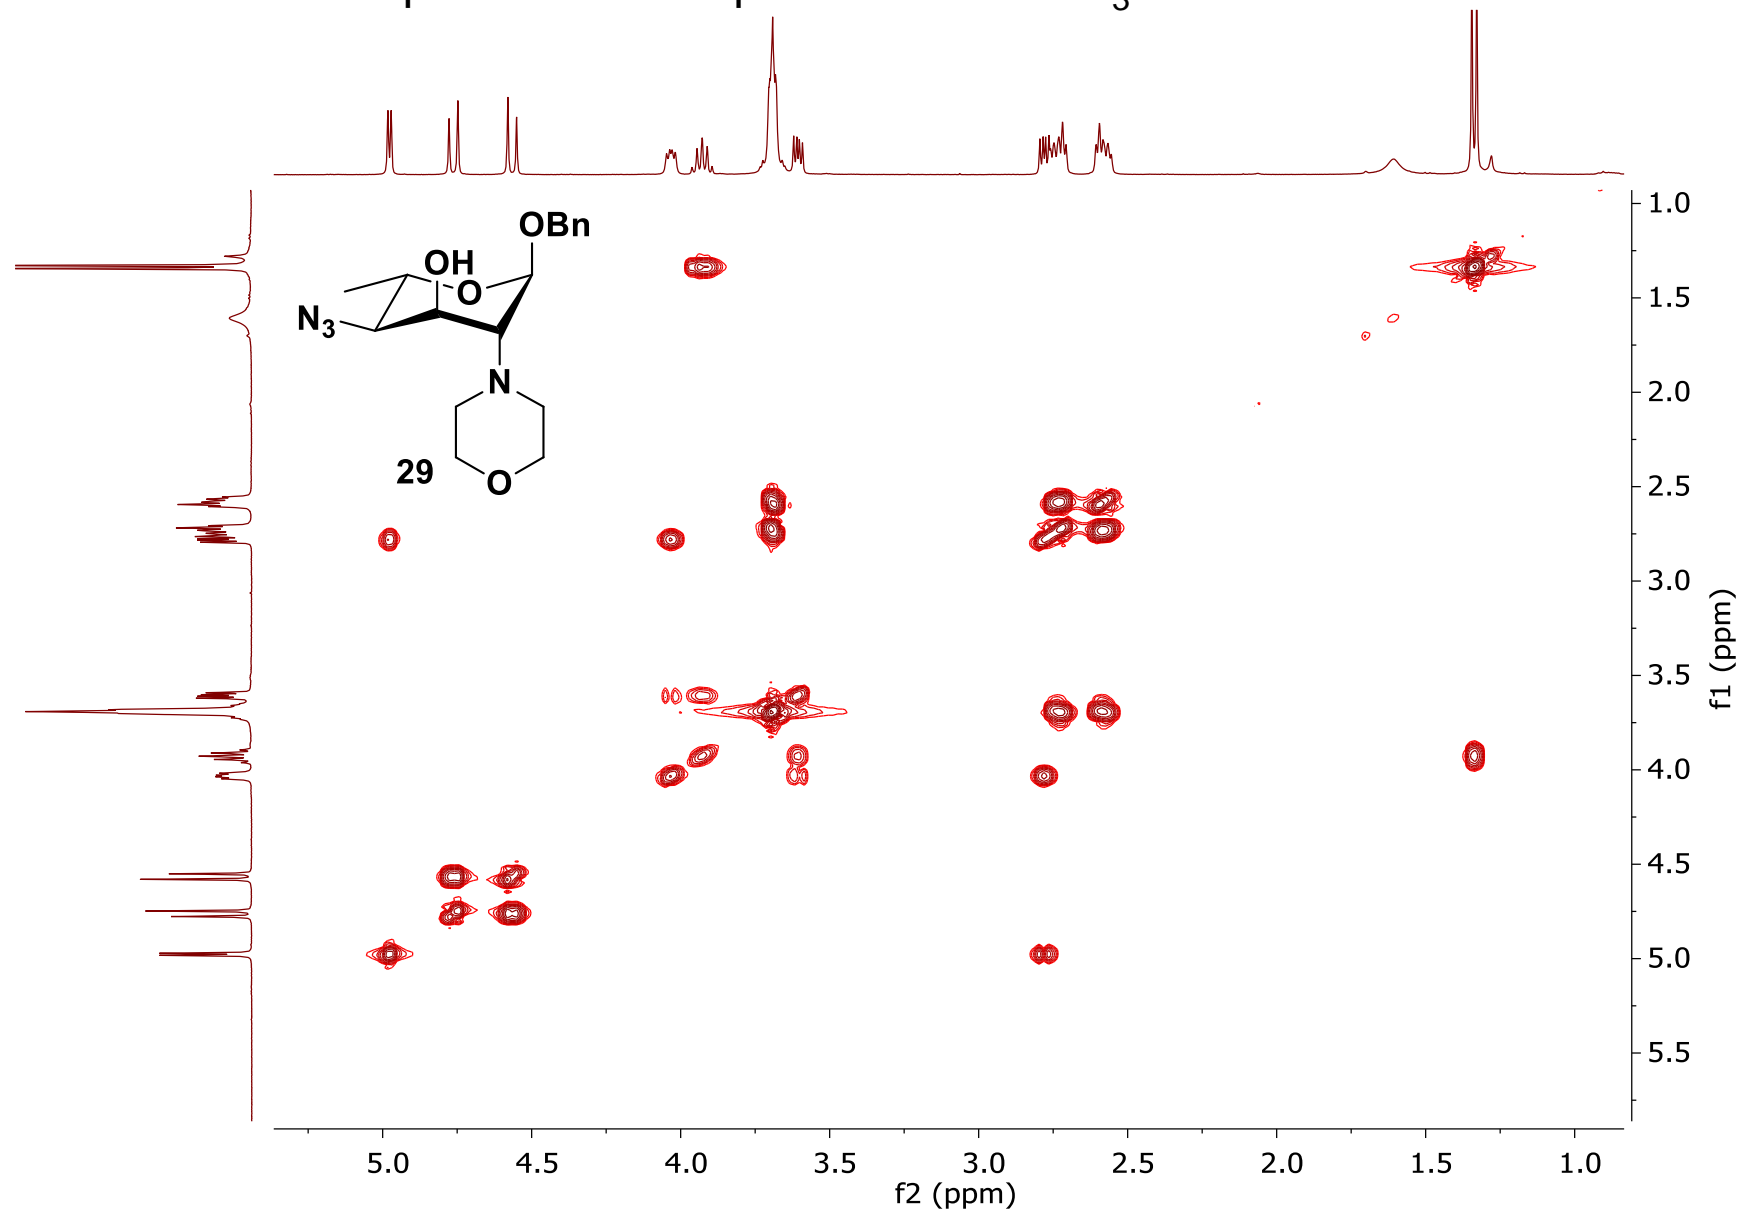

$^1\text{H}$ - $^{13}\text{C}$  GHSQC NMR spectrum of compound **29** in  $\text{CDCl}_3$

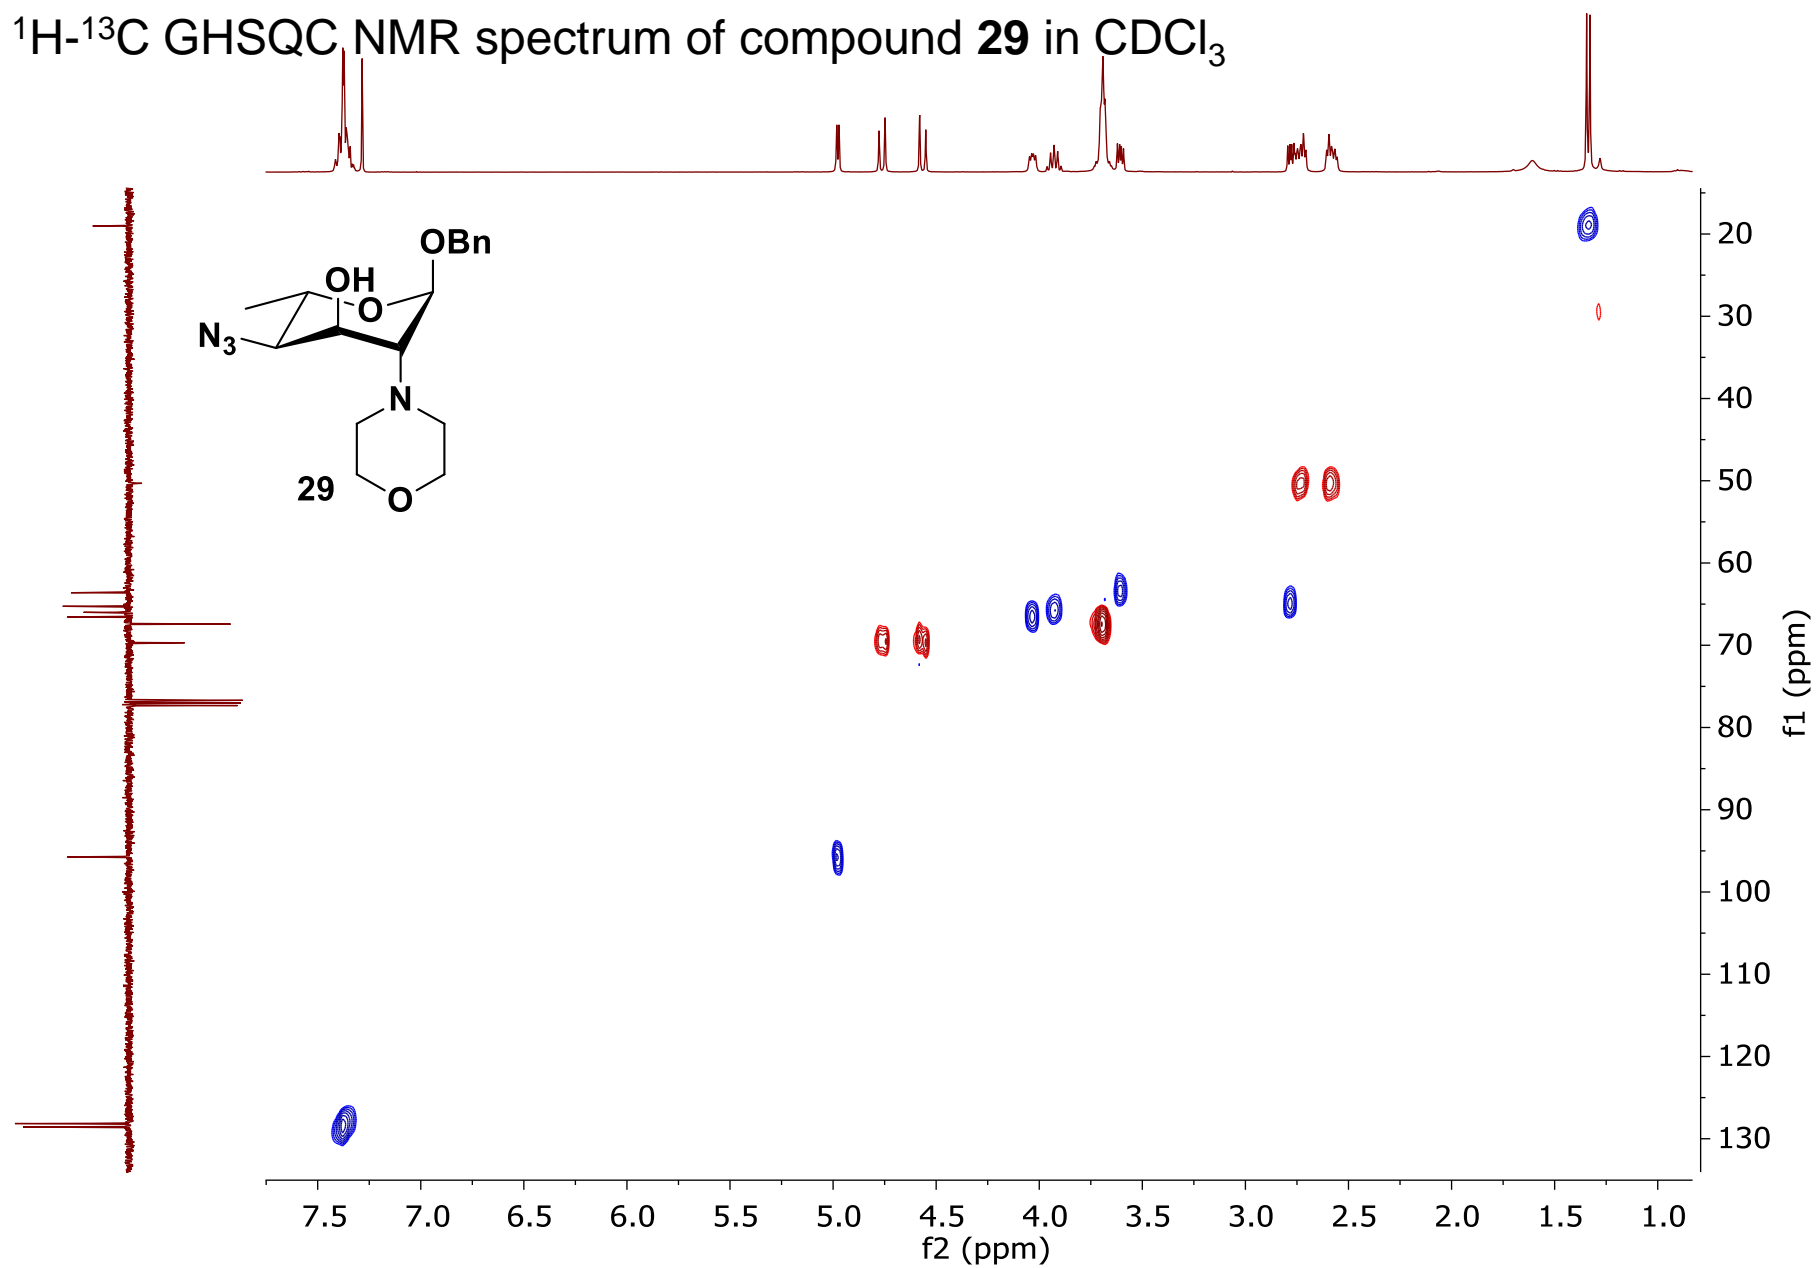

$^1\text{H}$  NMR spectrum of compound **30** in  $\text{CDCl}_3$  (400 MHz)

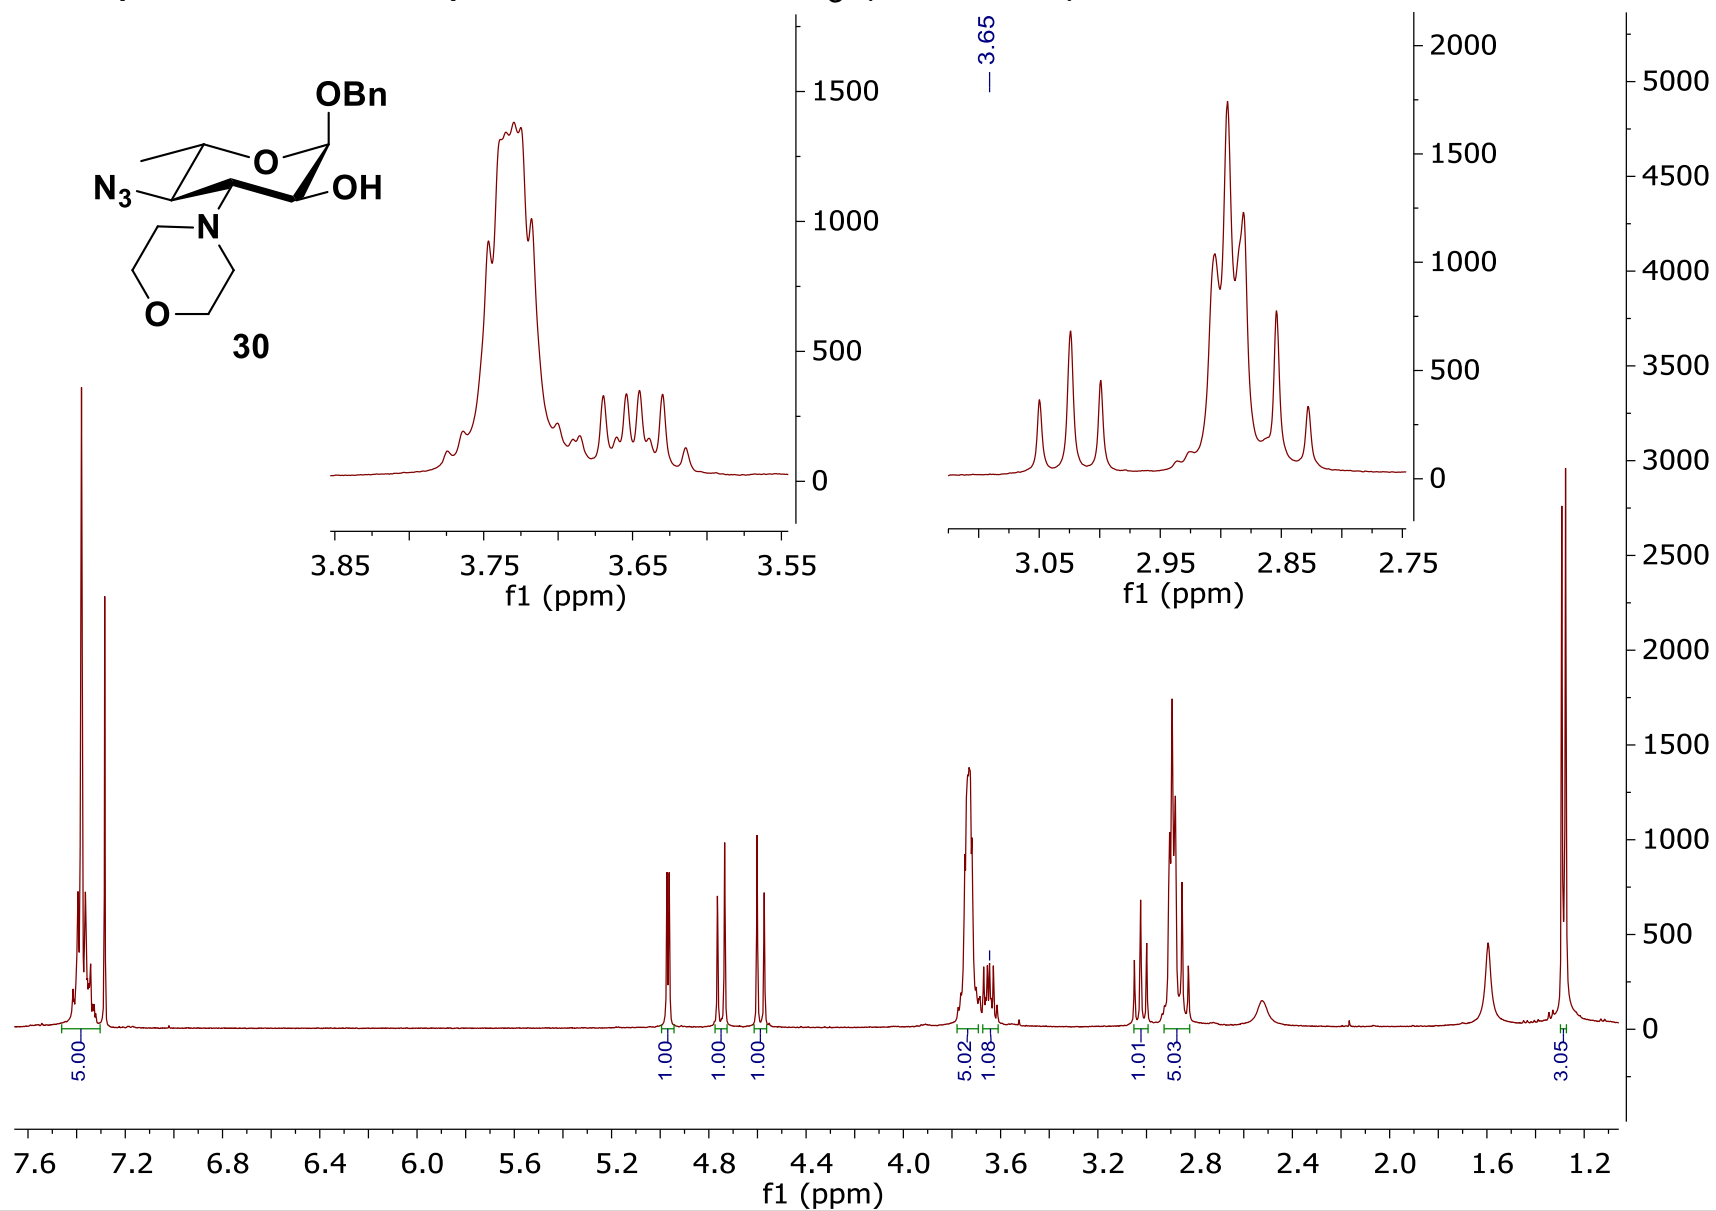

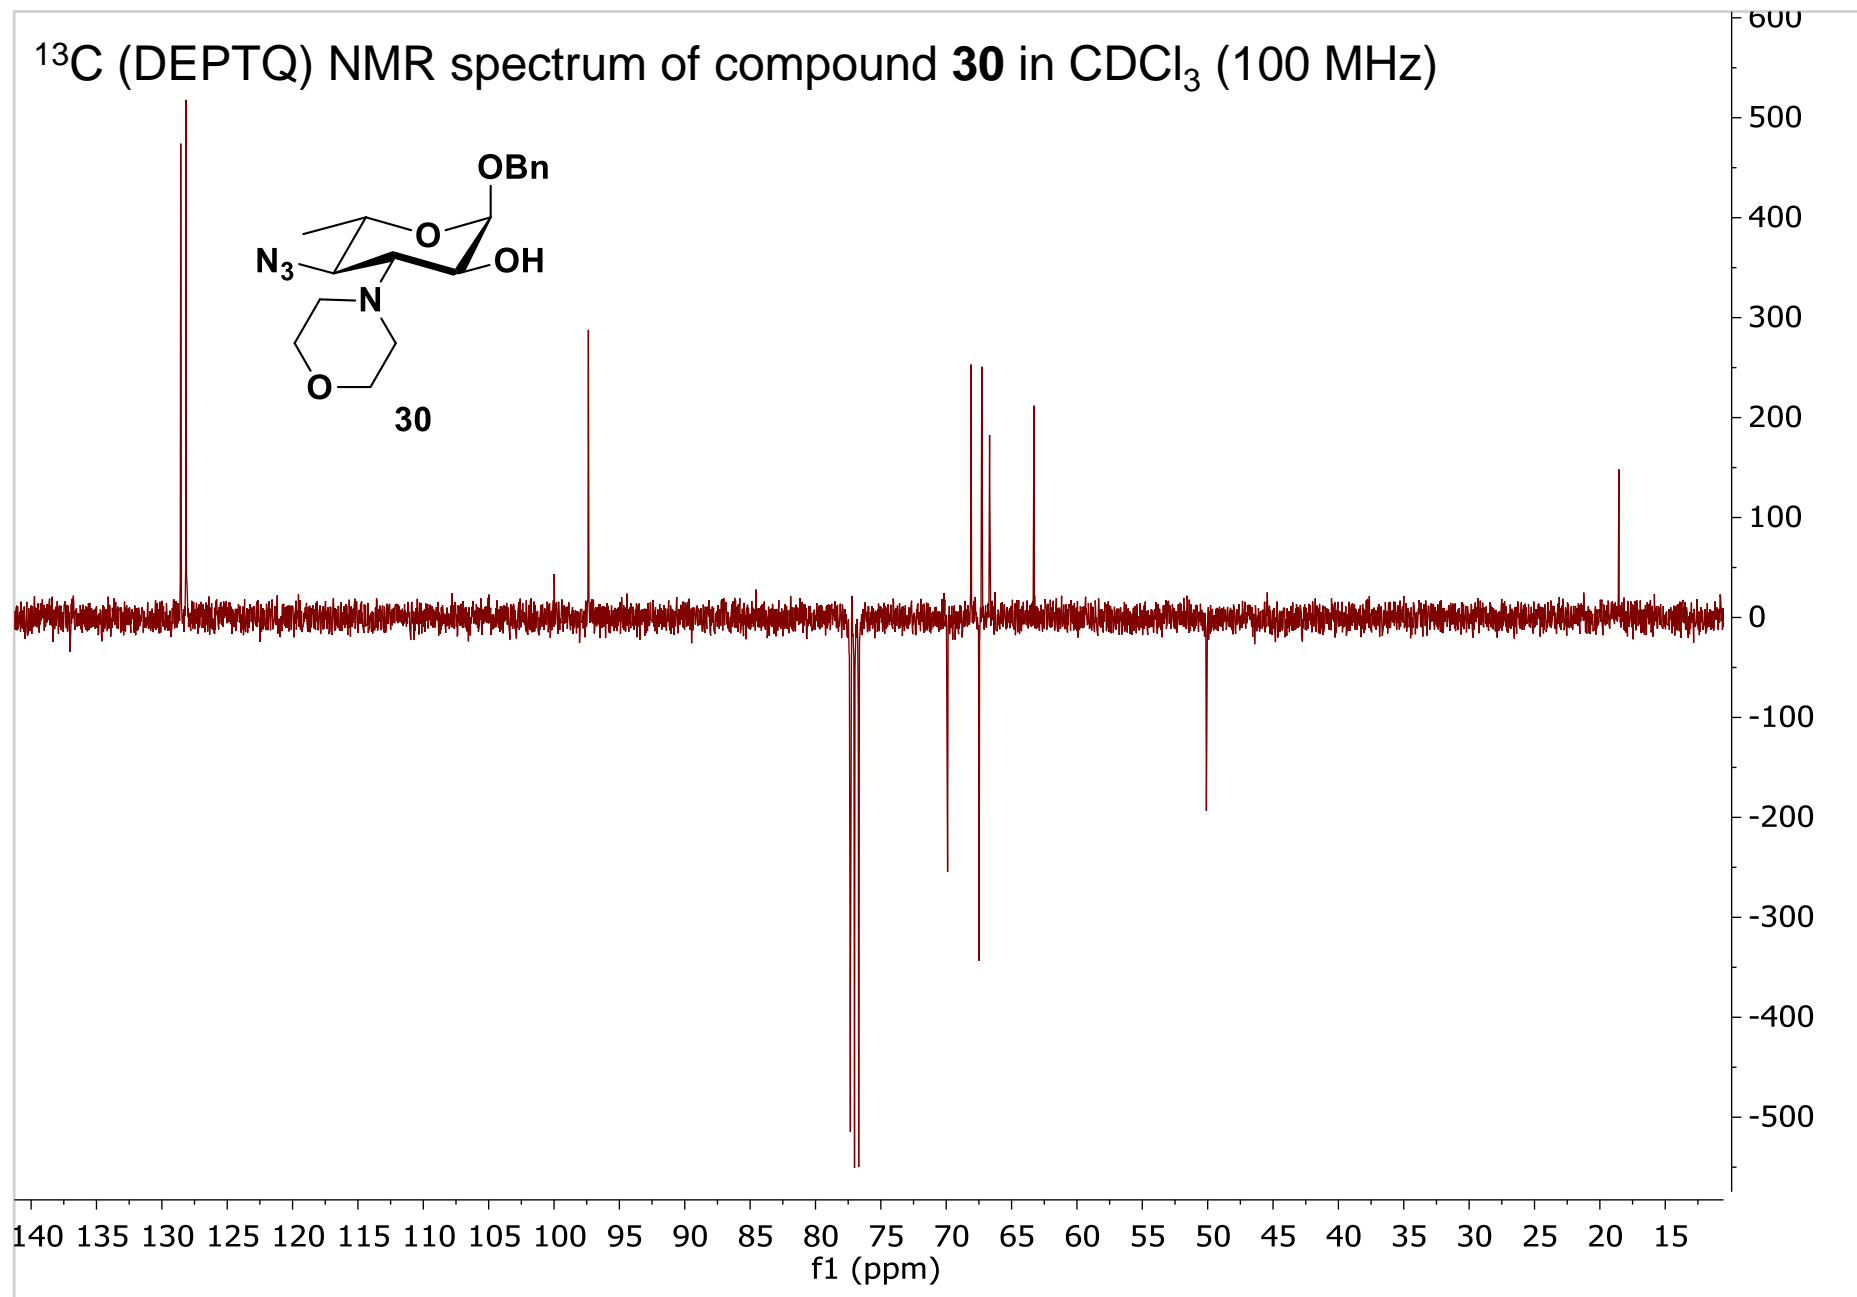

$^1\text{H}$ - $^1\text{H}$  GCOSY NMR spectrum of compound **30** in  $\text{CDCl}_3$

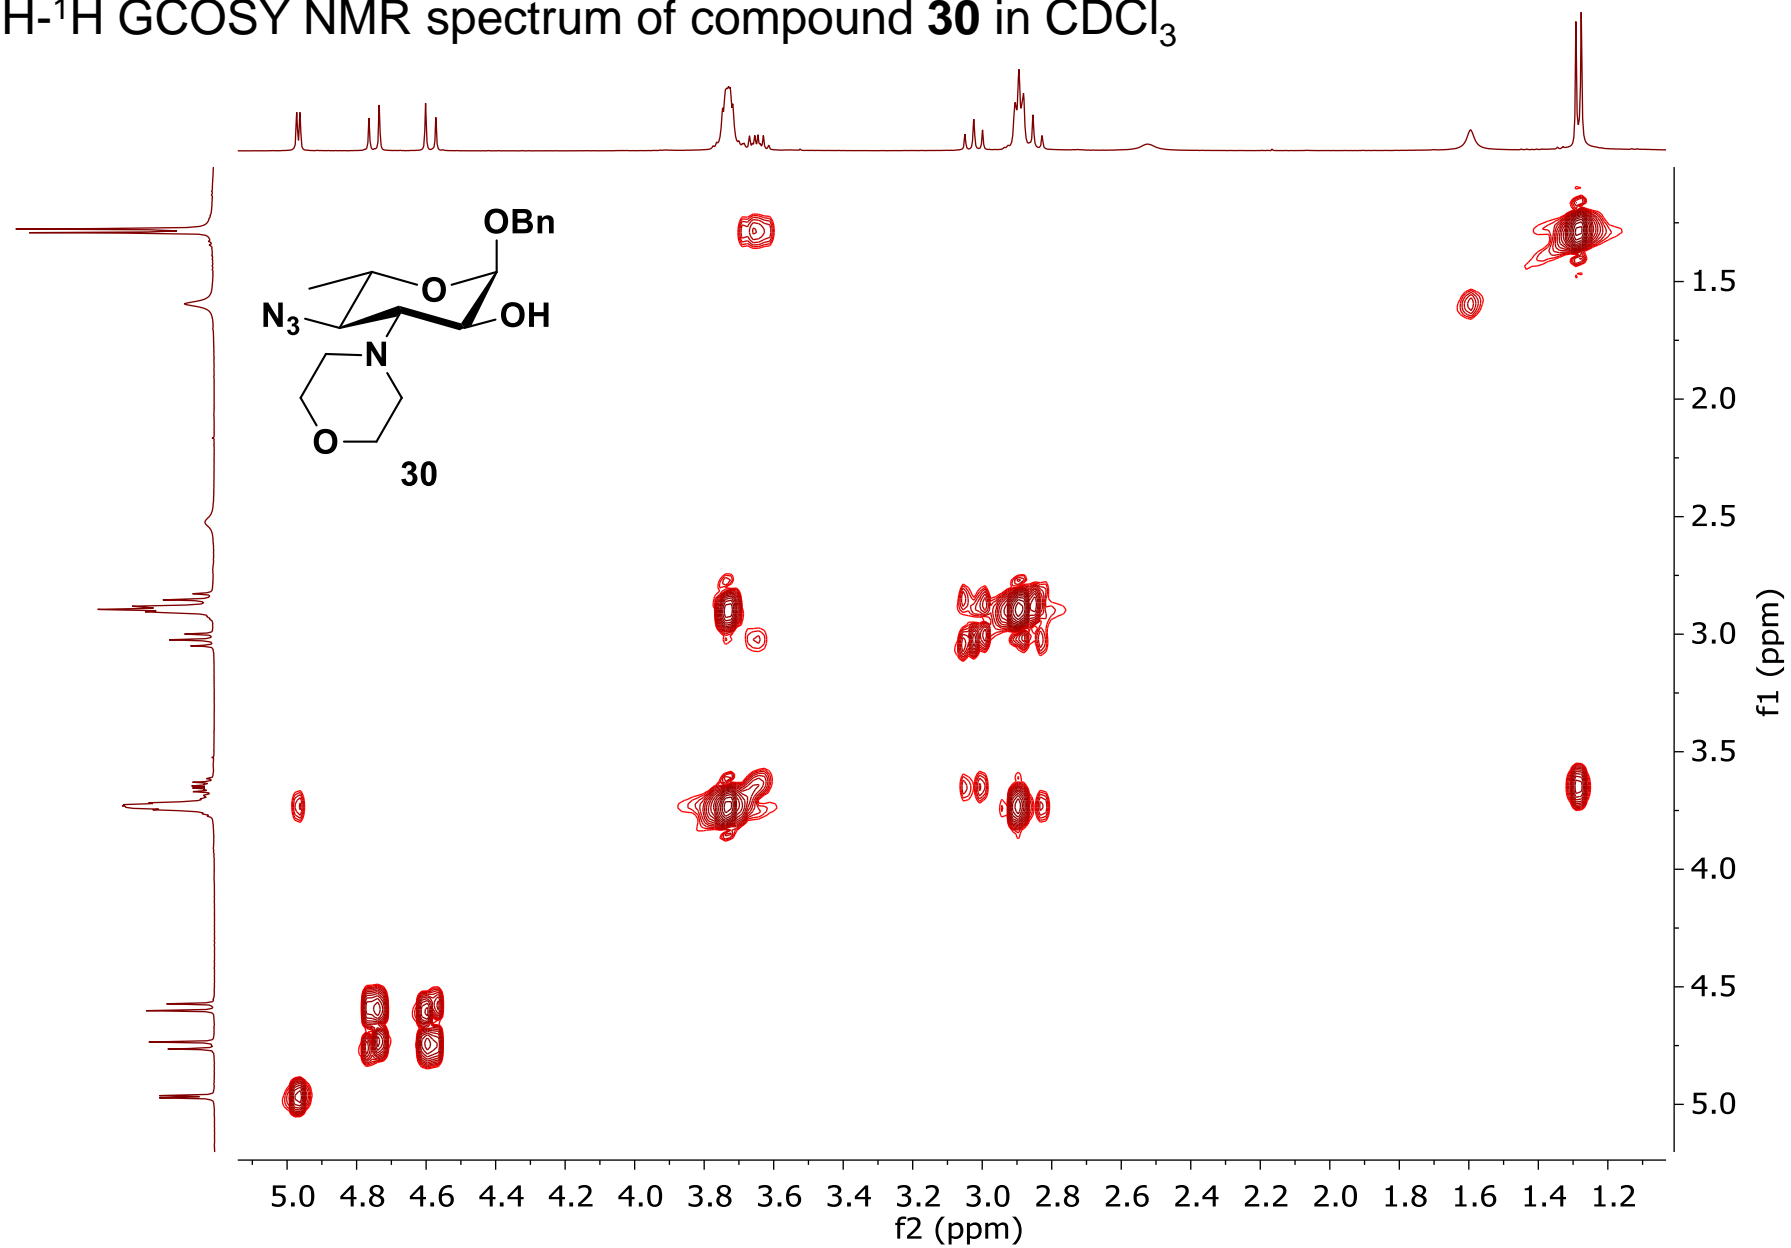

$^1\text{H}$ - $^{13}\text{C}$  GHSQC NMR spectrum of compound **30** in  $\text{CDCl}_3$

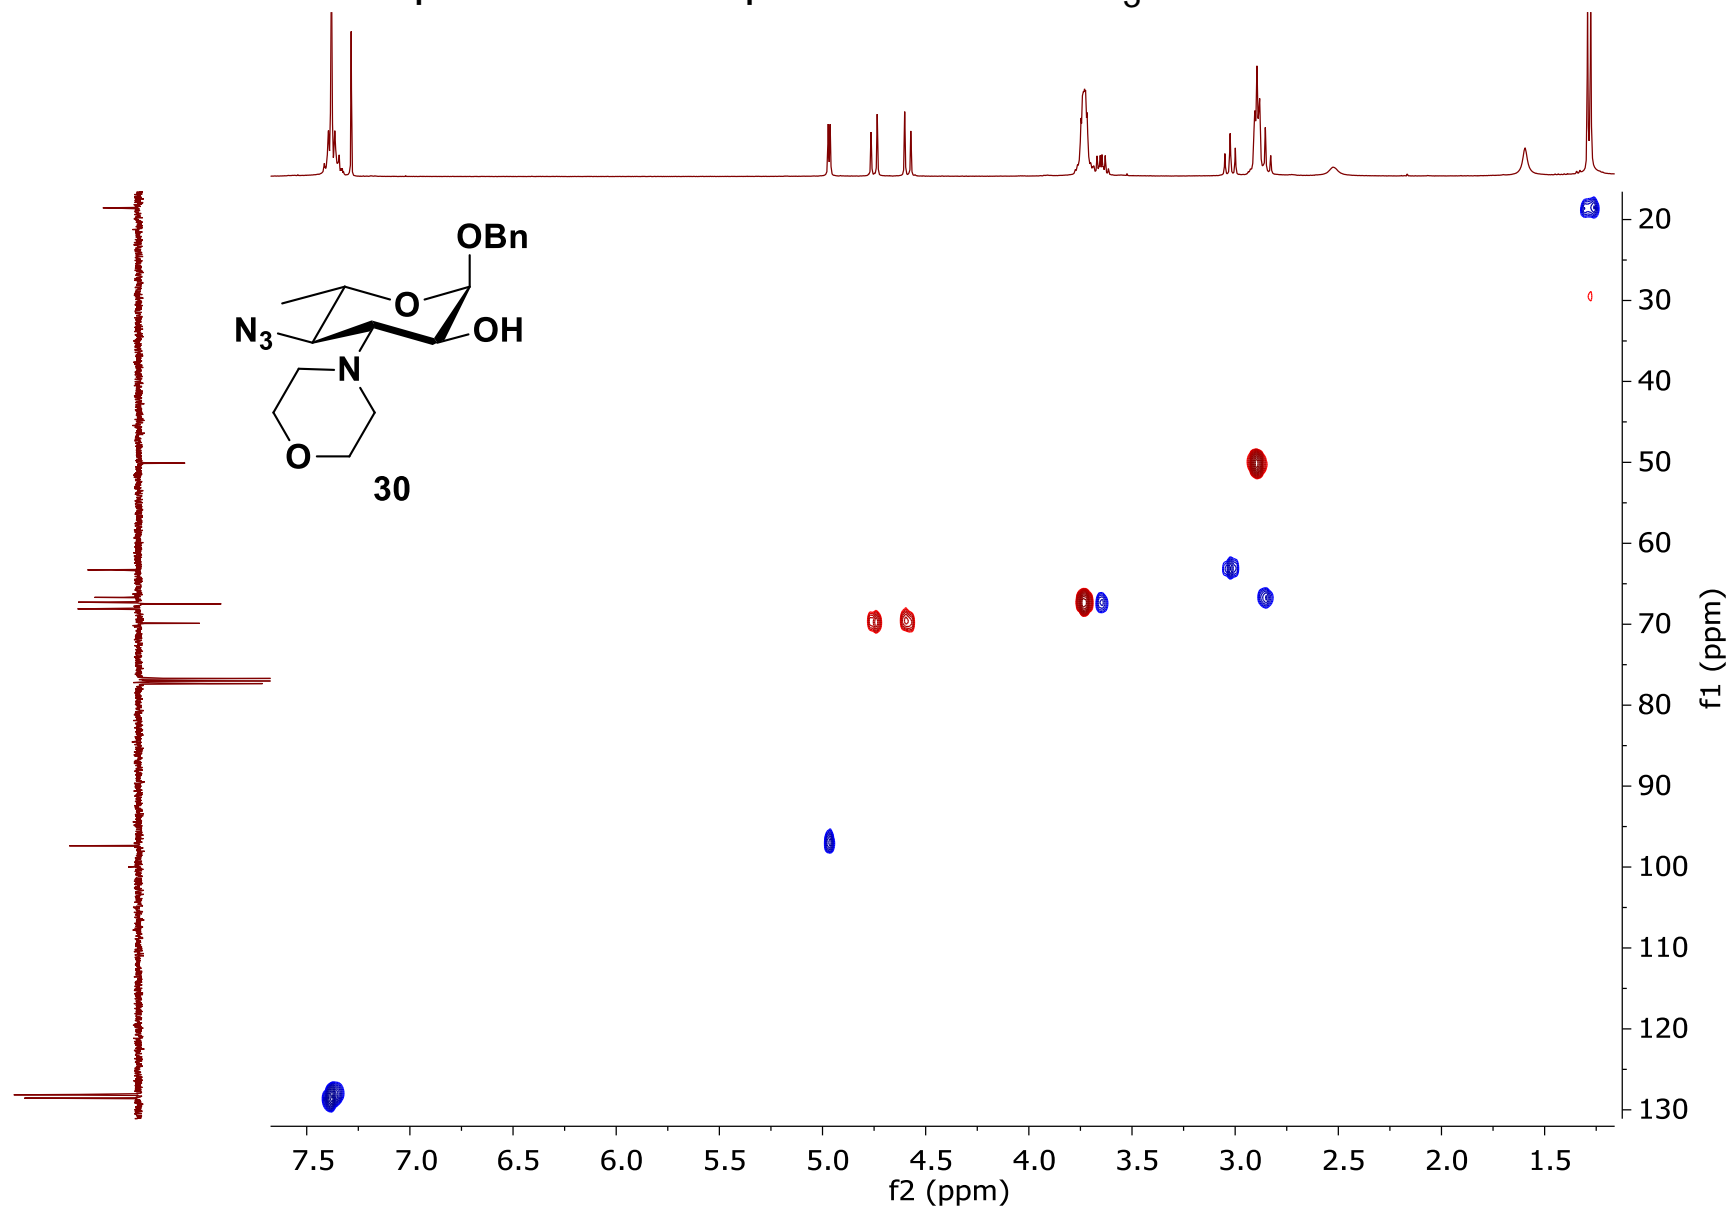

$^1\text{H}$  NMR spectrum of compound **32** in  $\text{CDCl}_3$  (400 MHz)

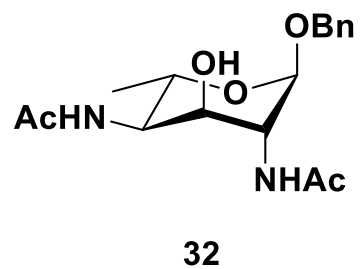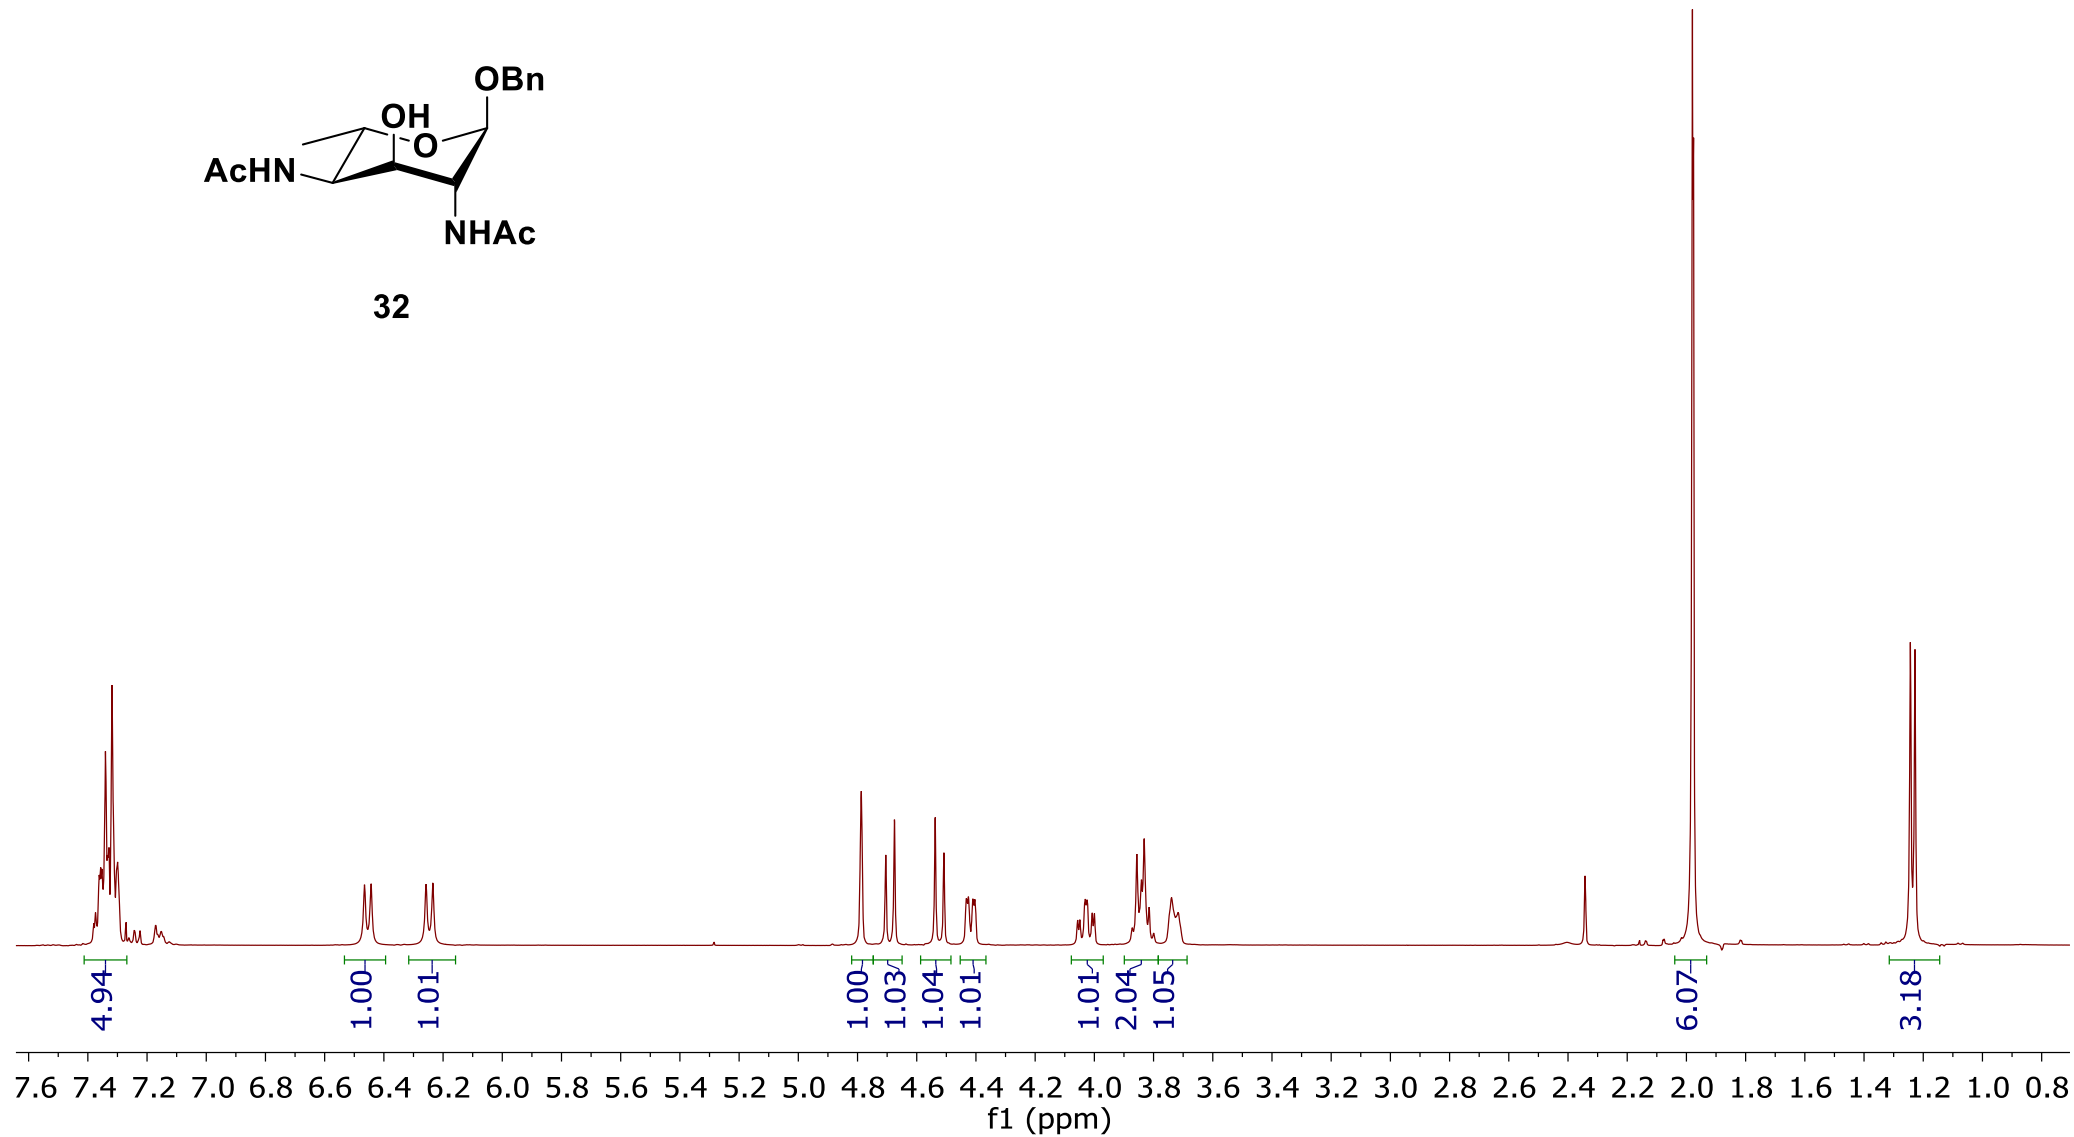

$^{13}\text{C}$  (DEPTQ) NMR spectrum of compound **32** in  $\text{CDCl}_3$  (100 MHz)

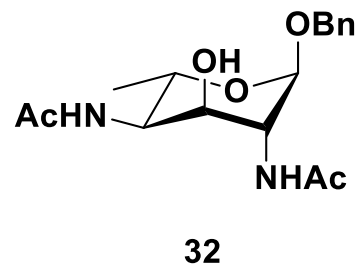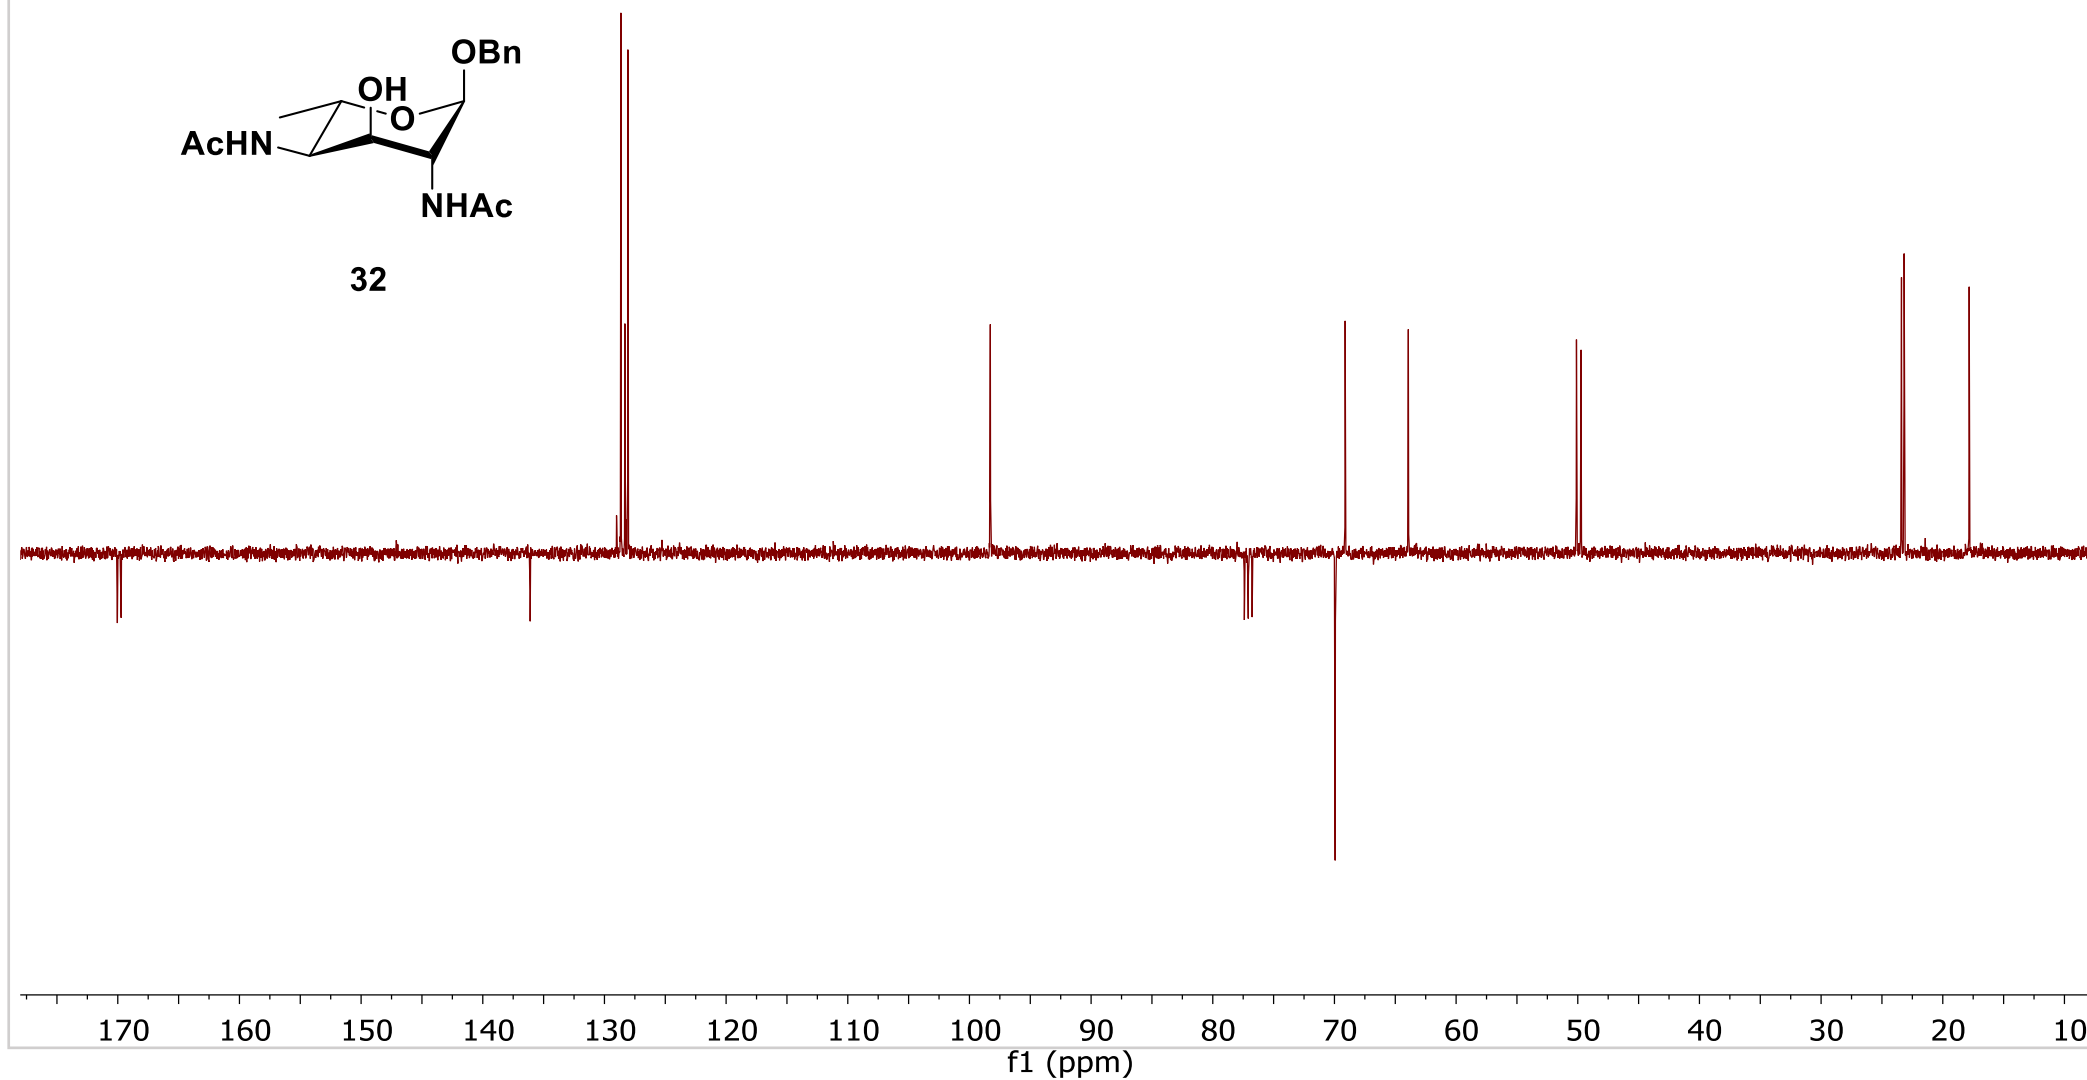



$^1\text{H}$ - $^1\text{H}$  GCOSY NMR spectrum of compound **32** in  $\text{CDCl}_3$

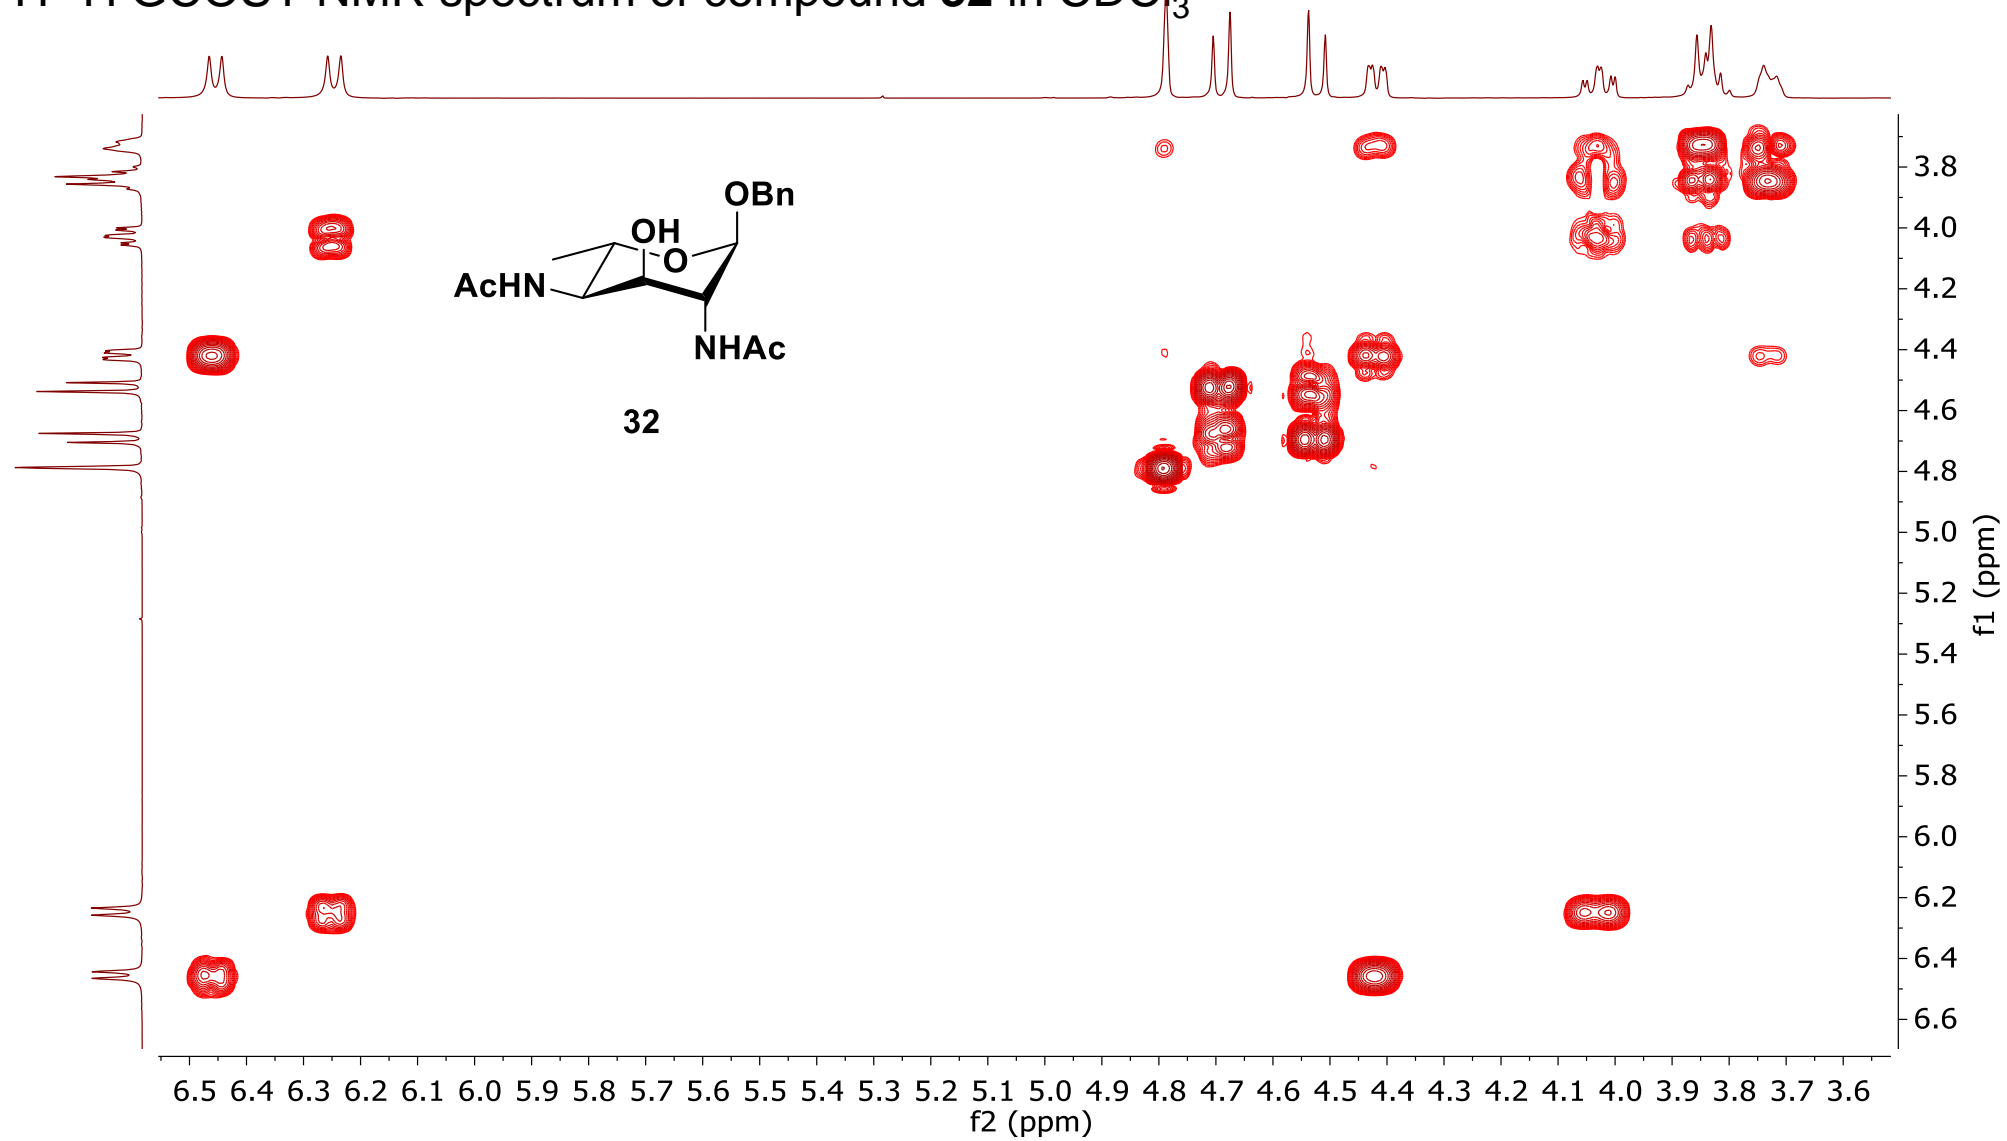

$^1\text{H}$ - $^{13}\text{C}$  GHSQC NMR spectrum of compound **32** in  $\text{CDCl}_3$

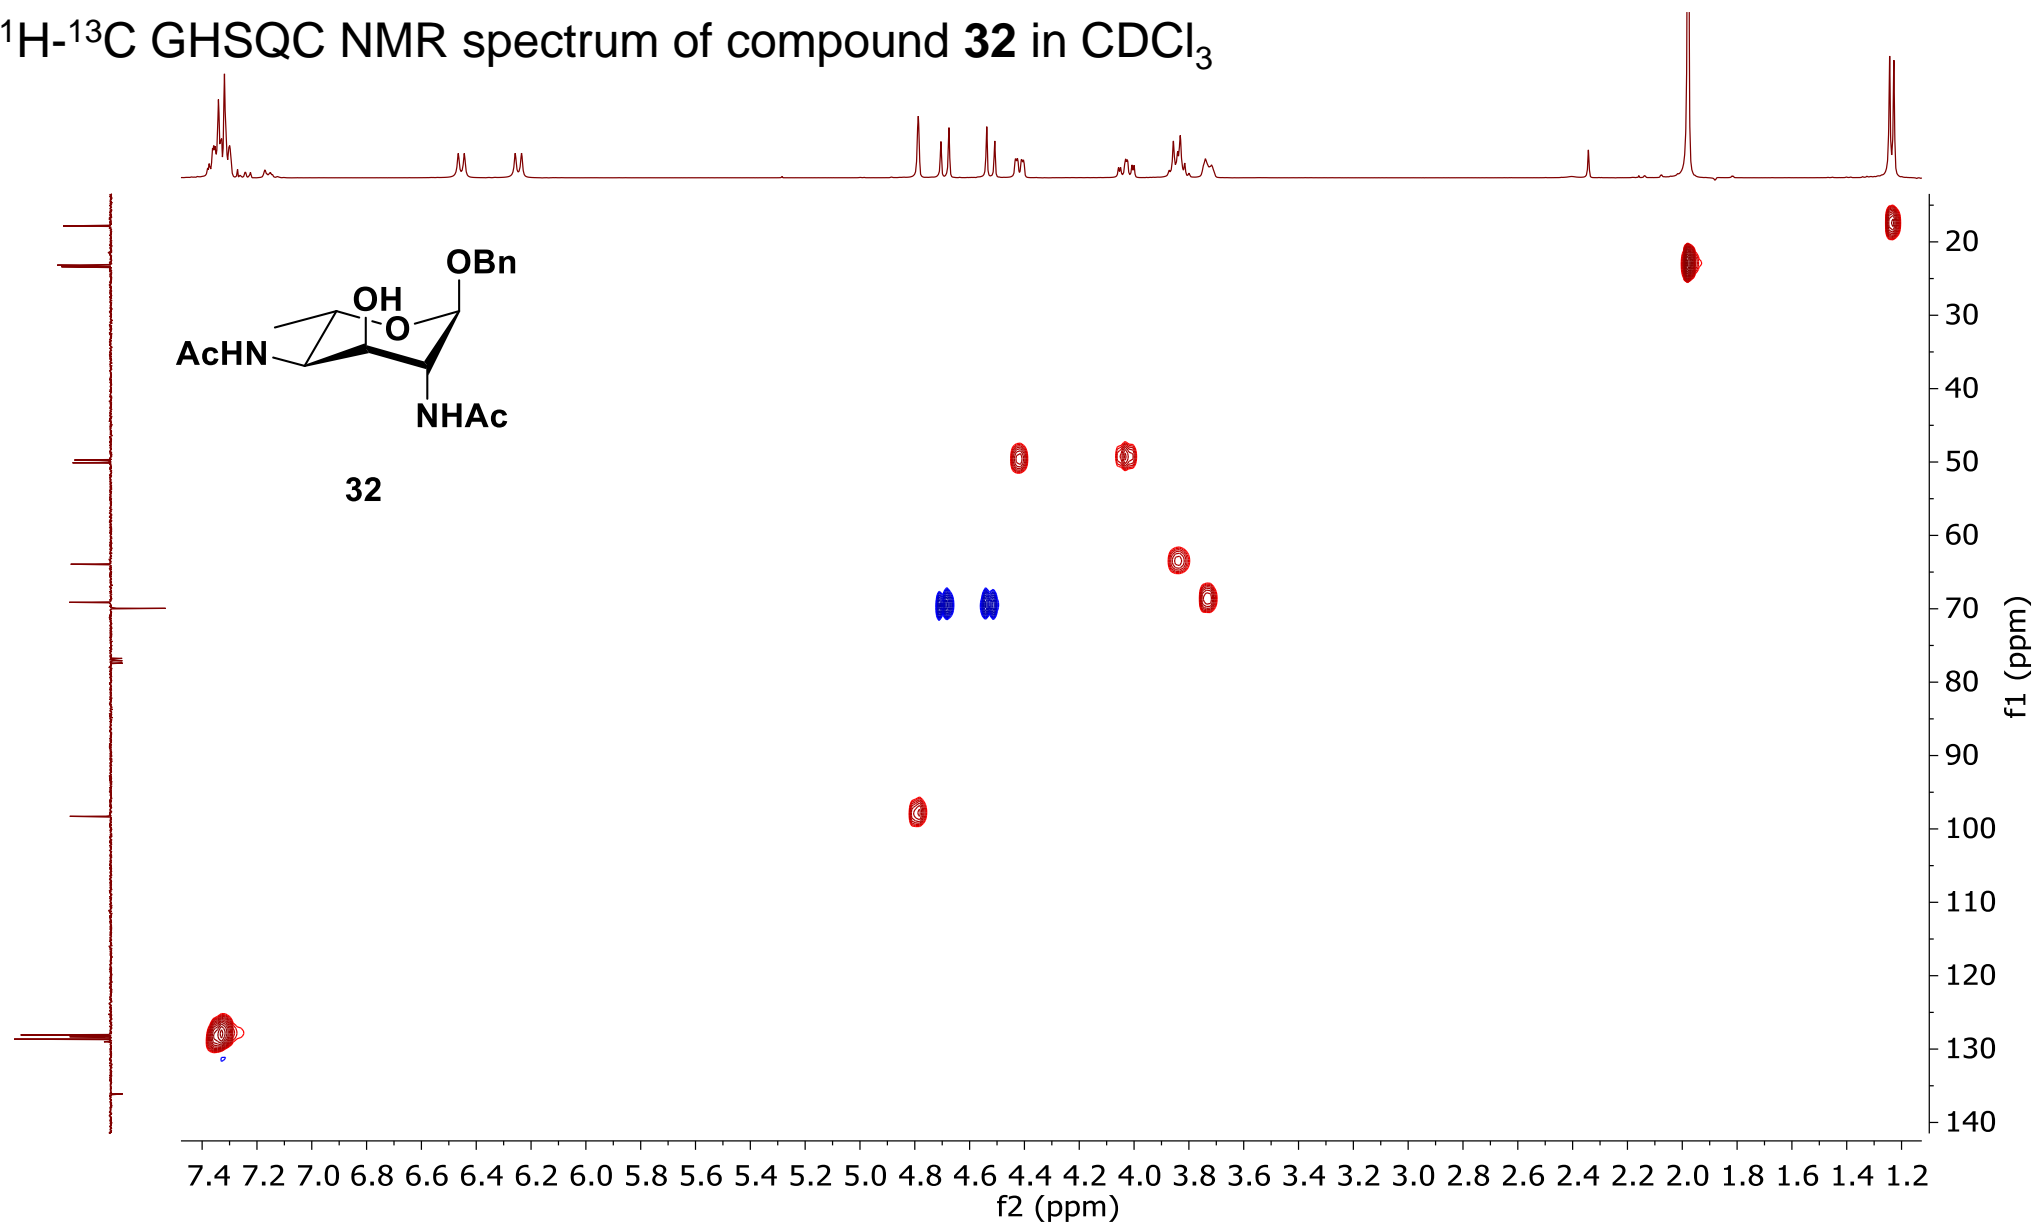

$^1\text{H}$  NMR spectrum of compound **5** in  $\text{D}_2\text{O}$  (400 MHz)

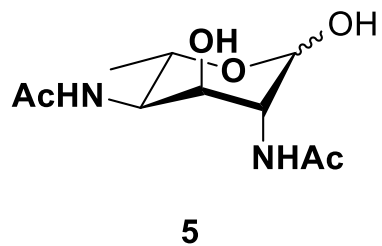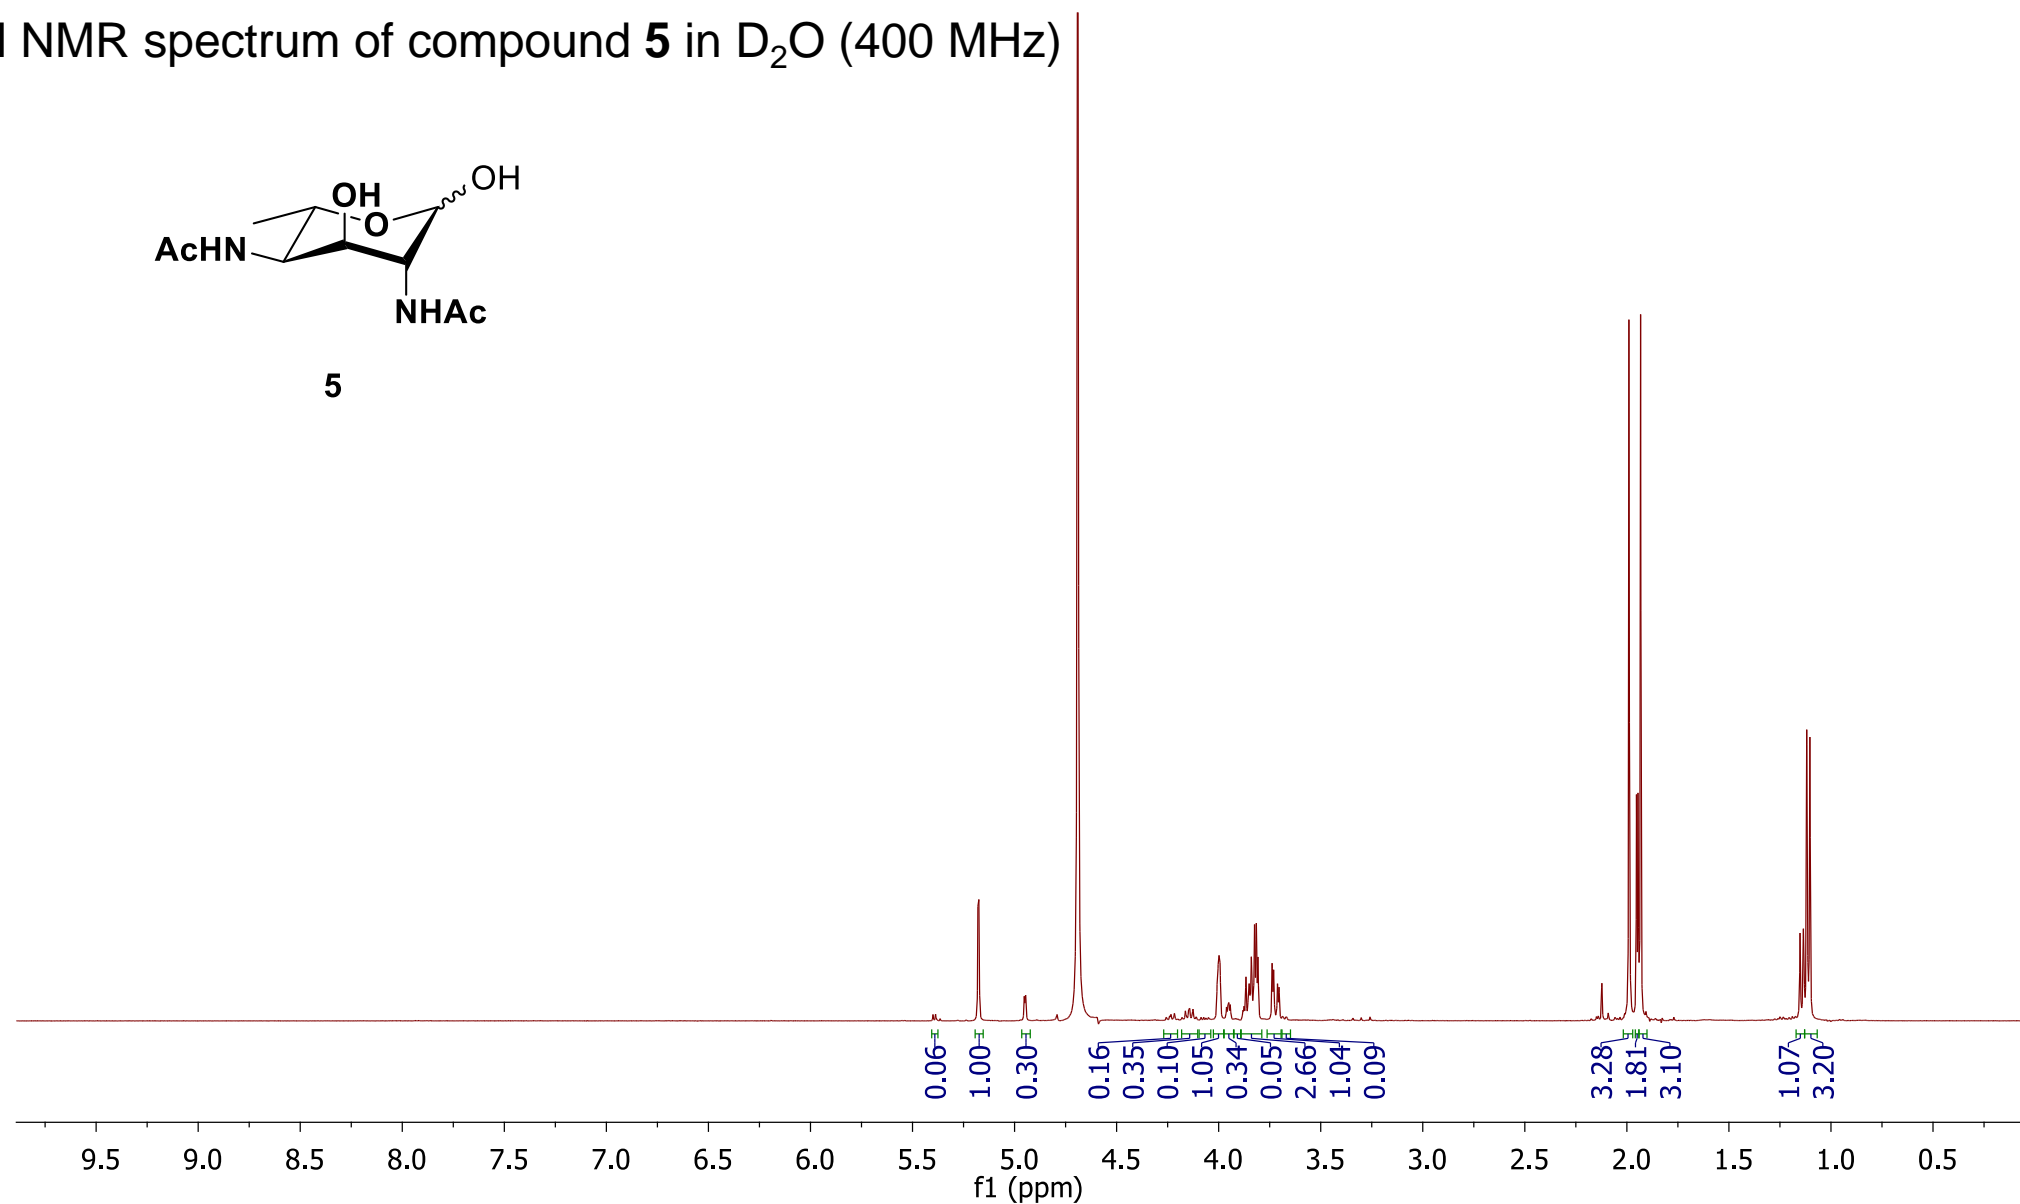

$^{13}\text{C}$  (DEPTQ) NMR spectrum of compound **5** in  $\text{D}_2\text{O}$  (100 MHz)

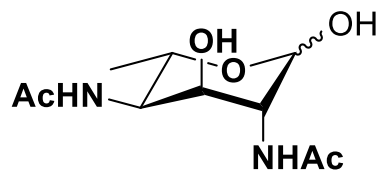

**5**

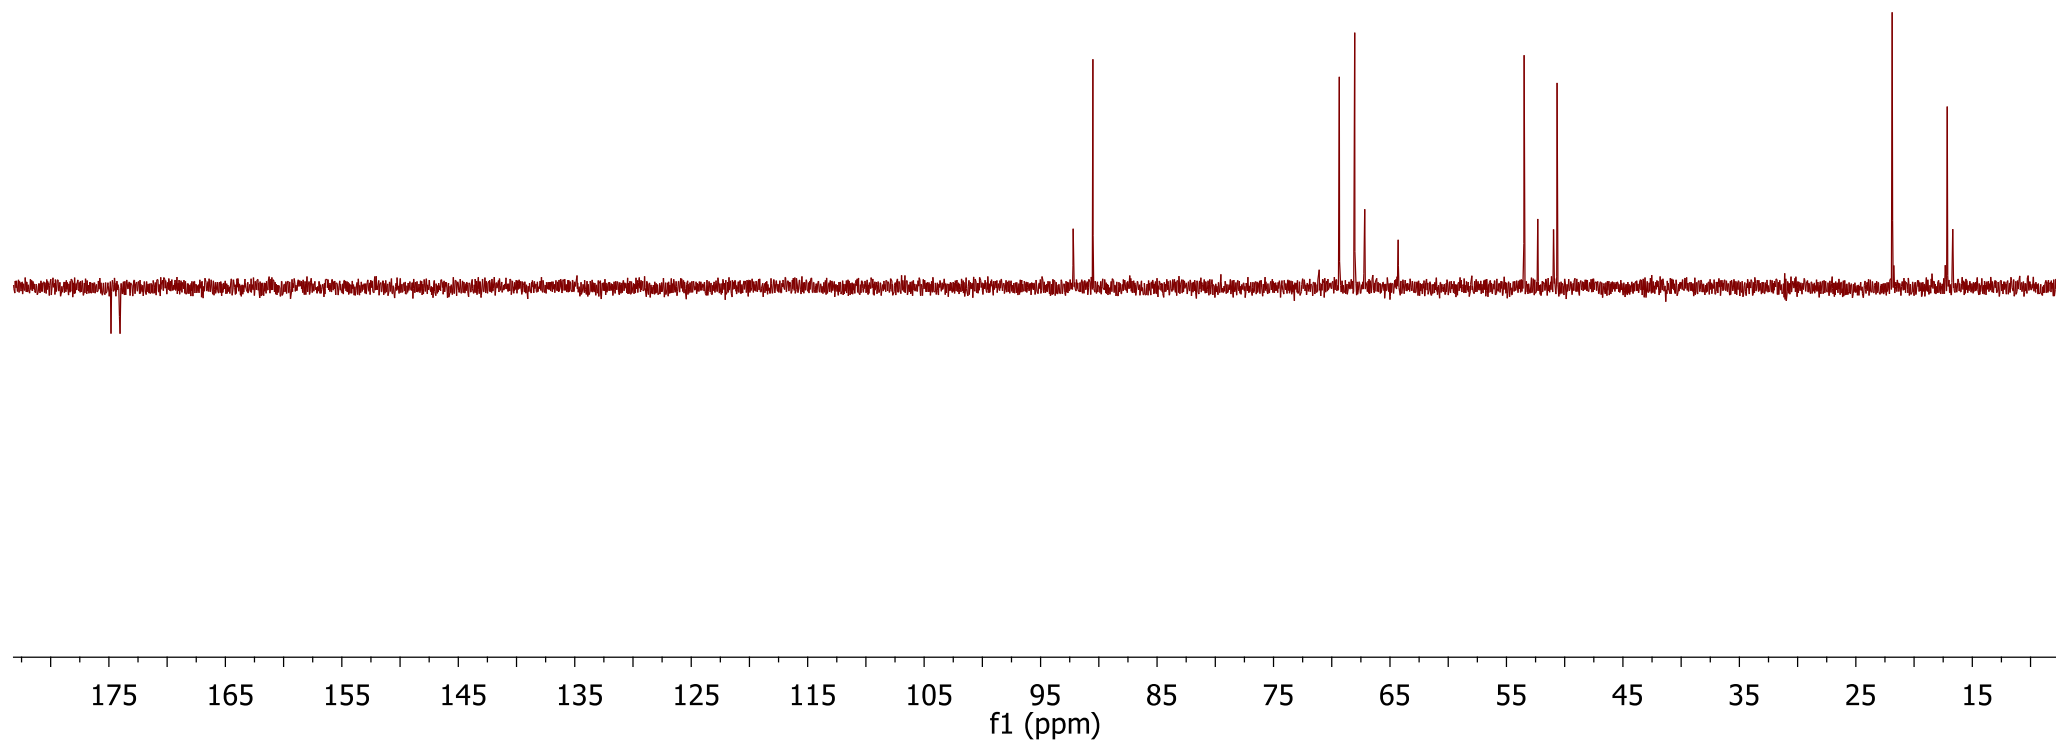

$^1\text{H}$ - $^1\text{H}$  GCOSY NMR spectrum of compound **5** in  $\text{D}_2\text{O}$  (400 MHz)

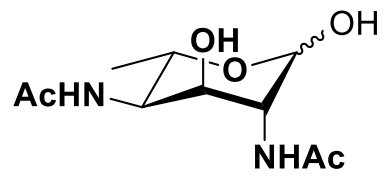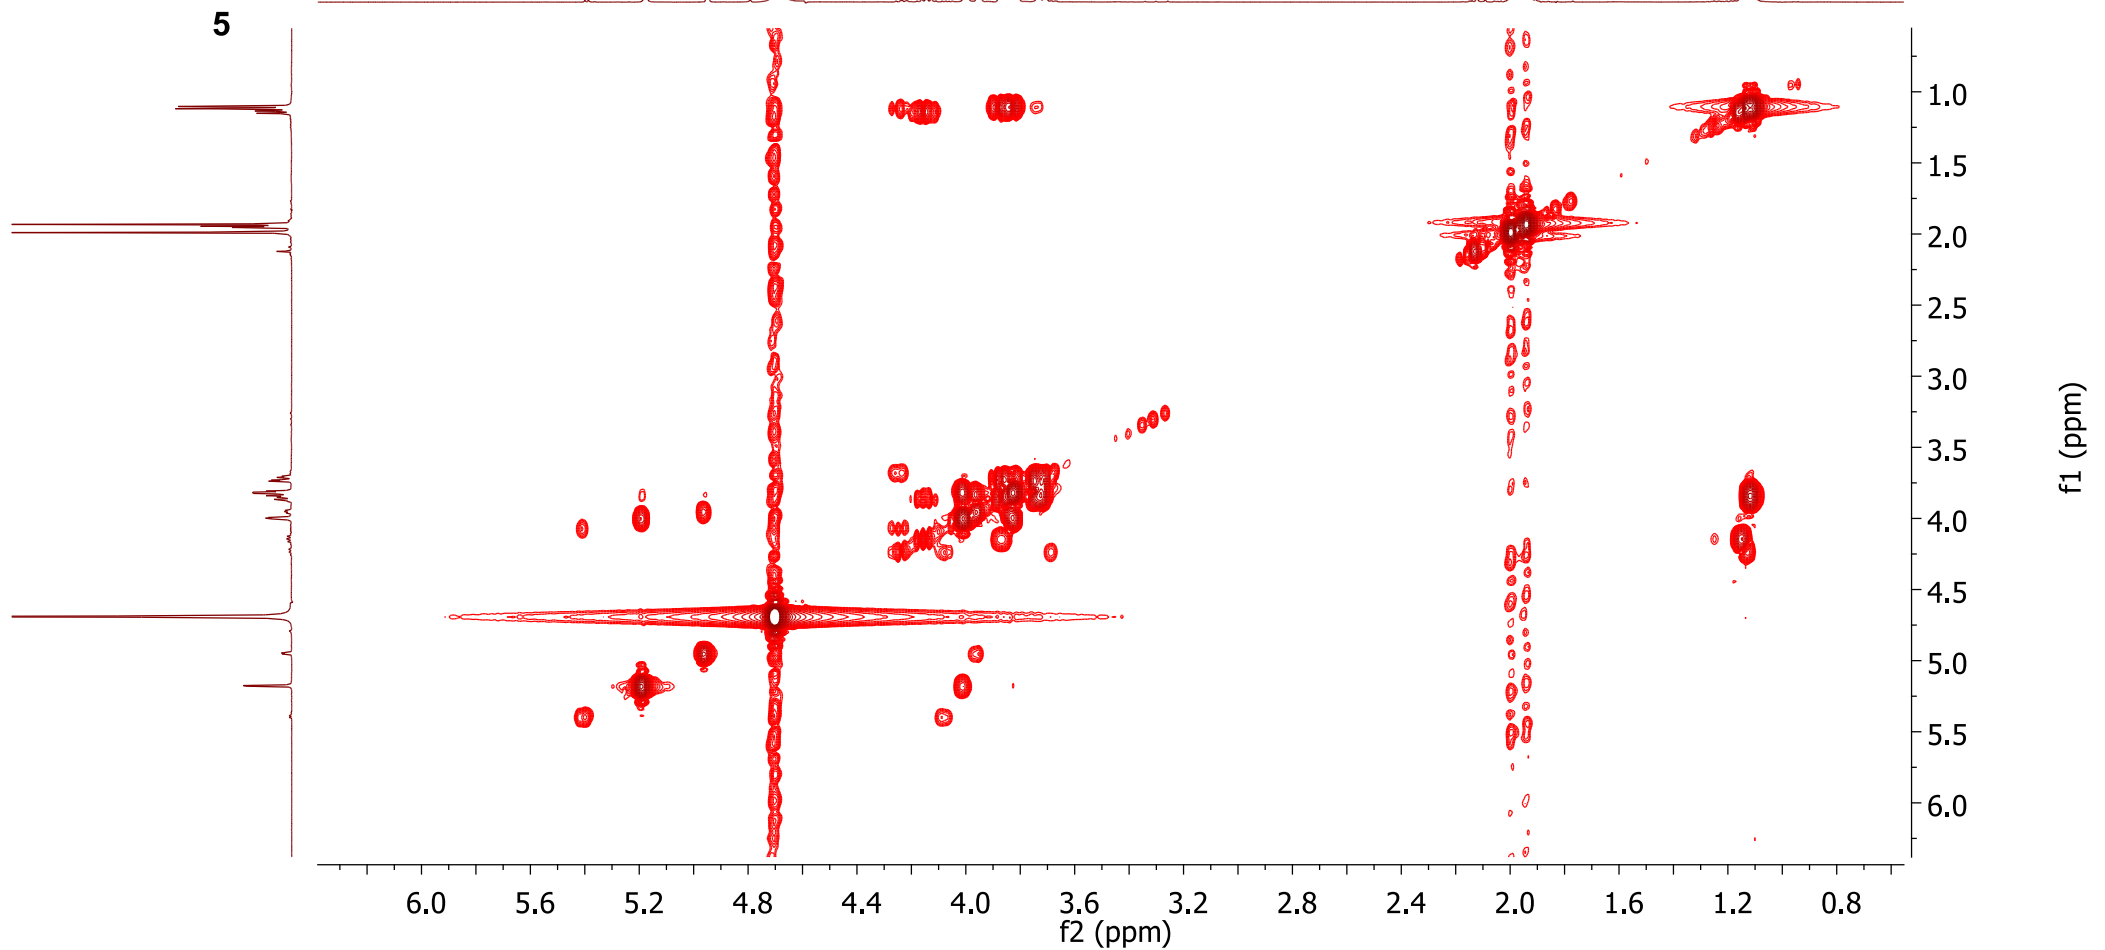

$^1\text{H}$ - $^{13}\text{C}$  GHSQC NMR spectrum of compound **5** in  $\text{D}_2\text{O}$  (400 MHz)

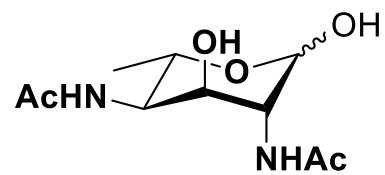

**5**

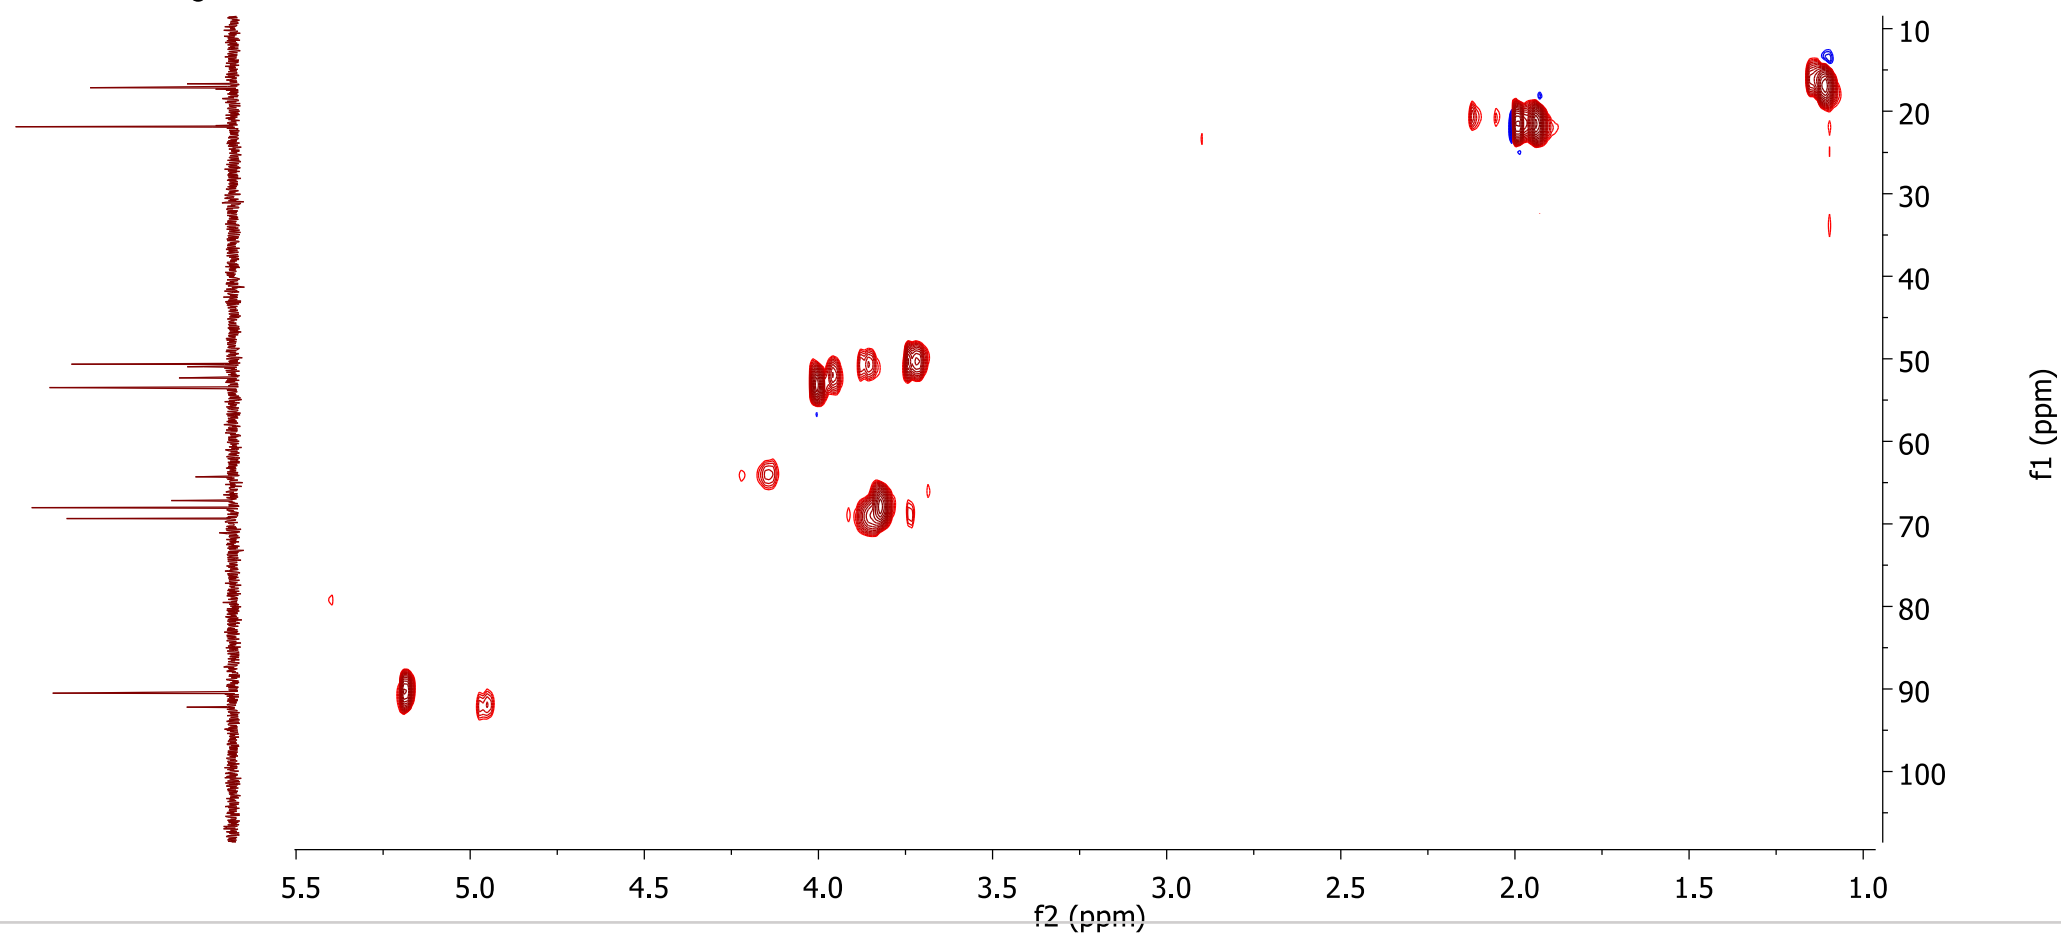

$^1\text{H}$  NMR spectrum of compound **36** in  $\text{CDCl}_3$  (400 MHz)

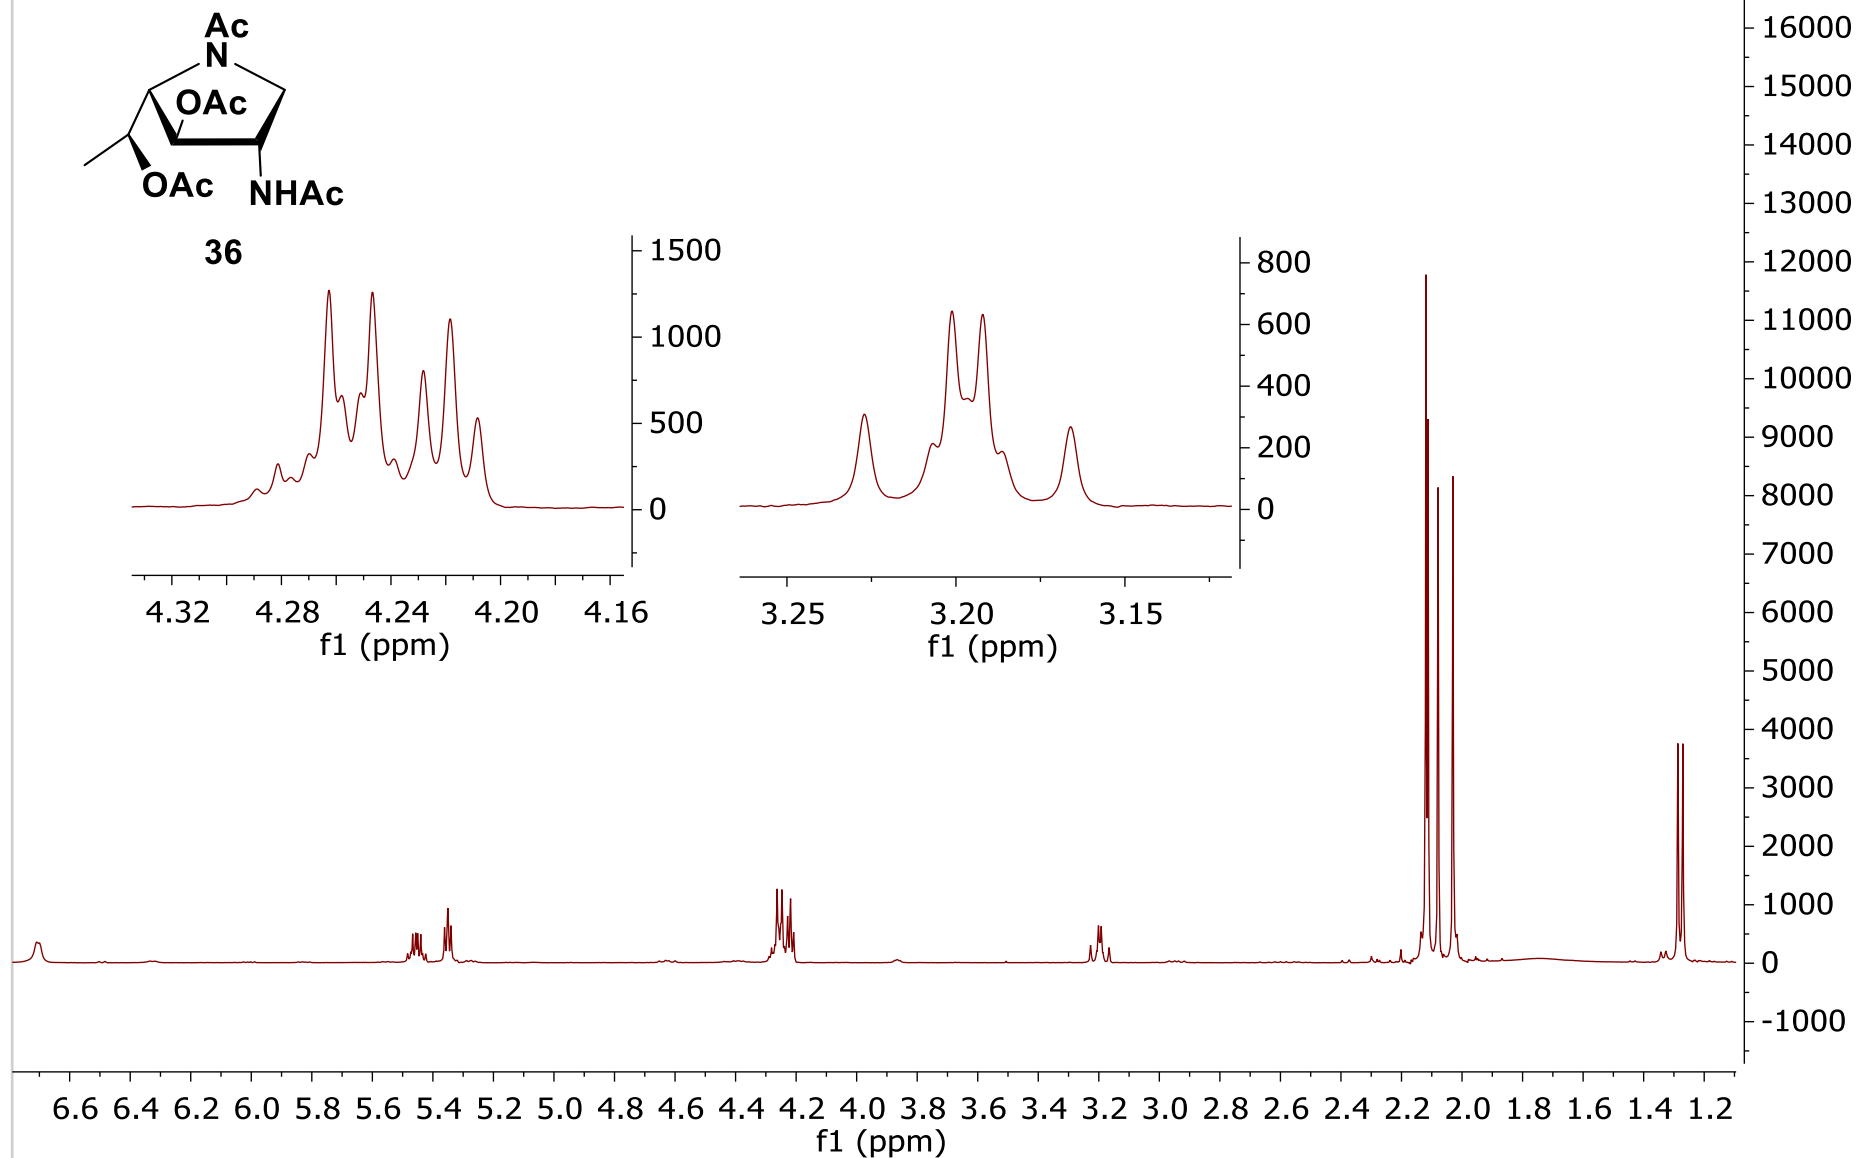

$^{13}\text{C}$  NMR spectrum of compound **36** in  $\text{CDCl}_3$  (100 MHz)

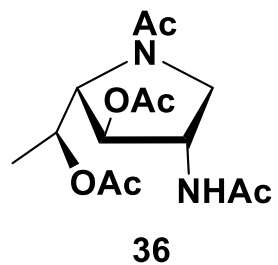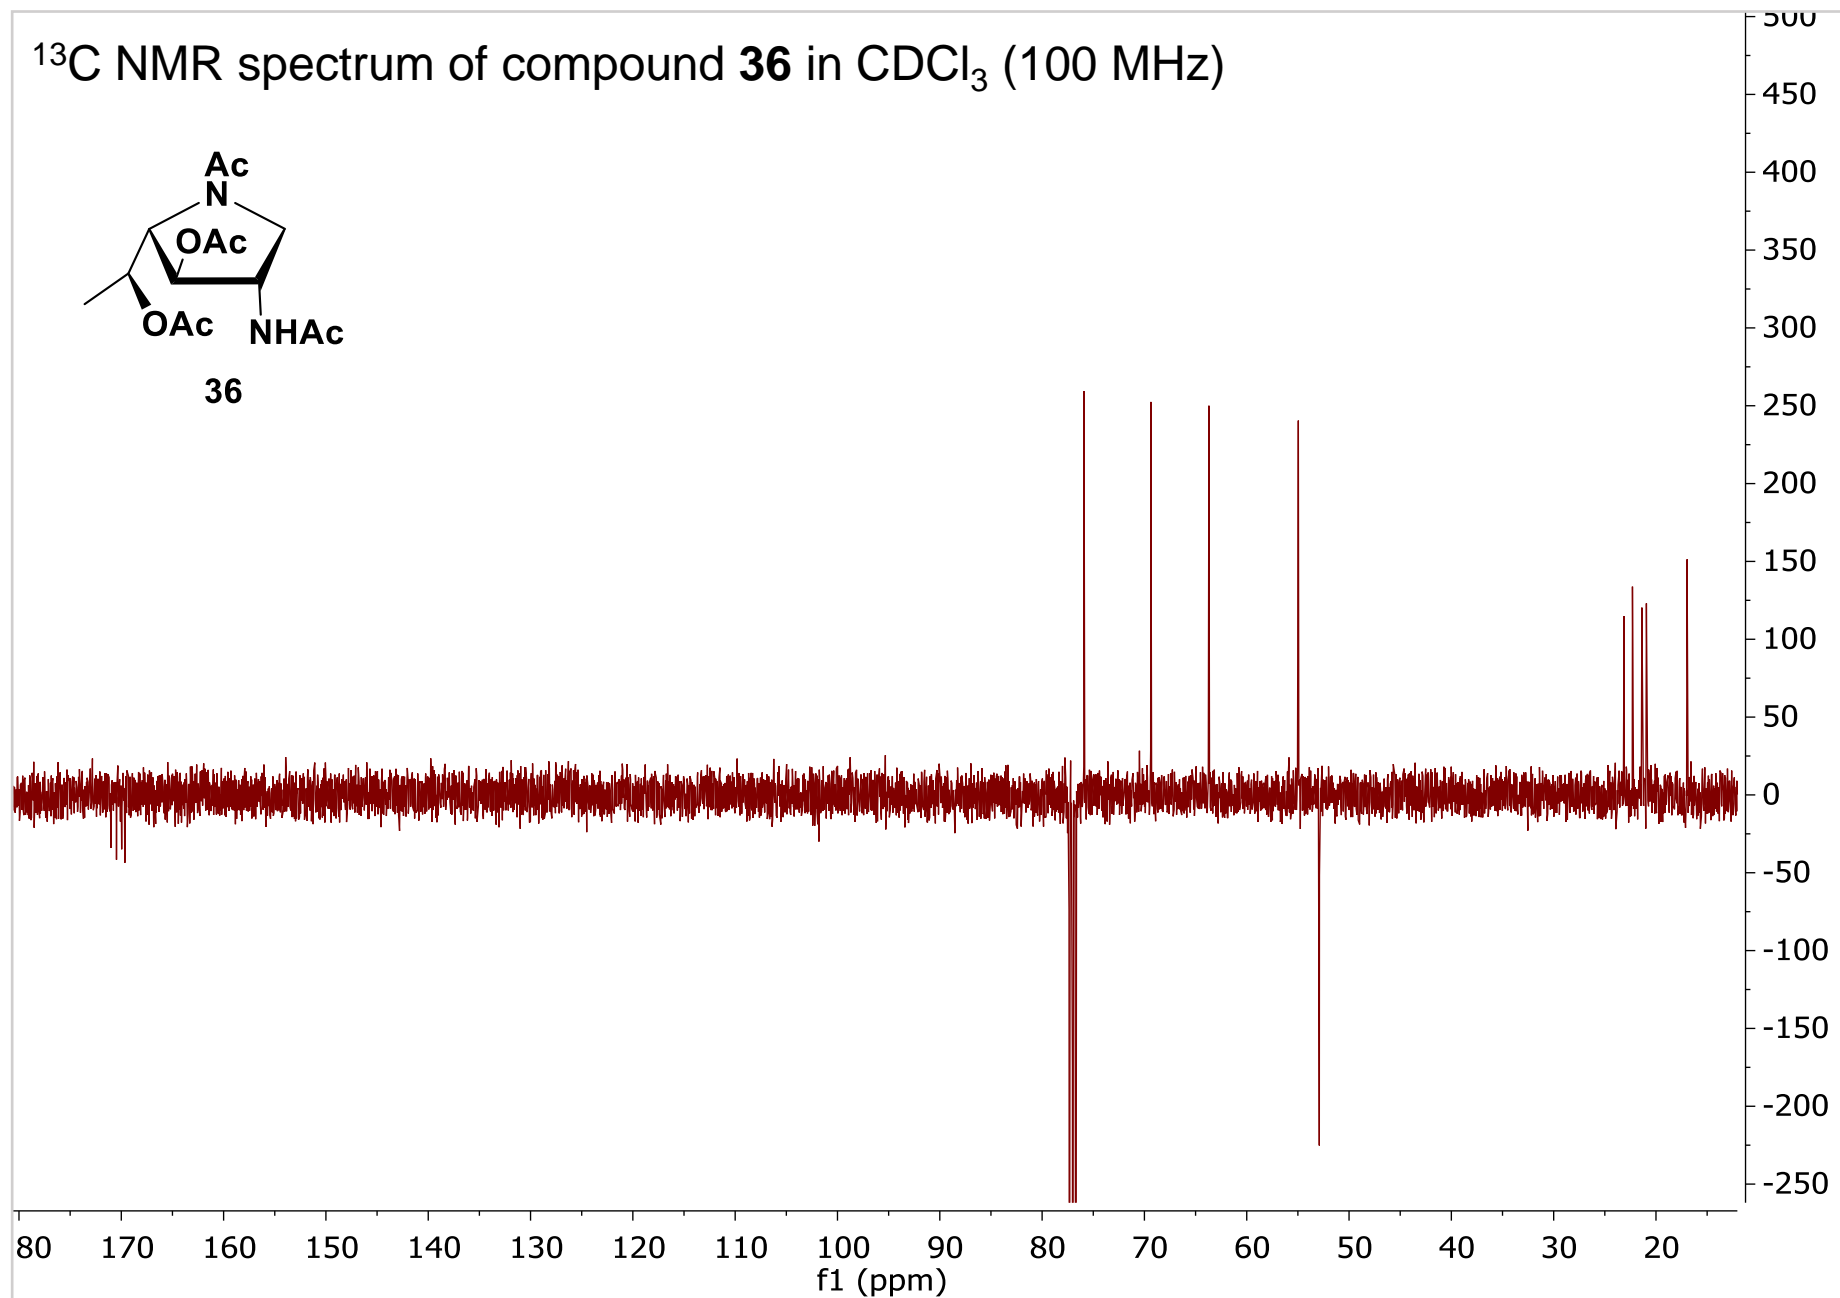



$^1\text{H}$ - $^1\text{H}$  GCOSY NMR spectrum of compound **36** in  $\text{CDCl}_3$

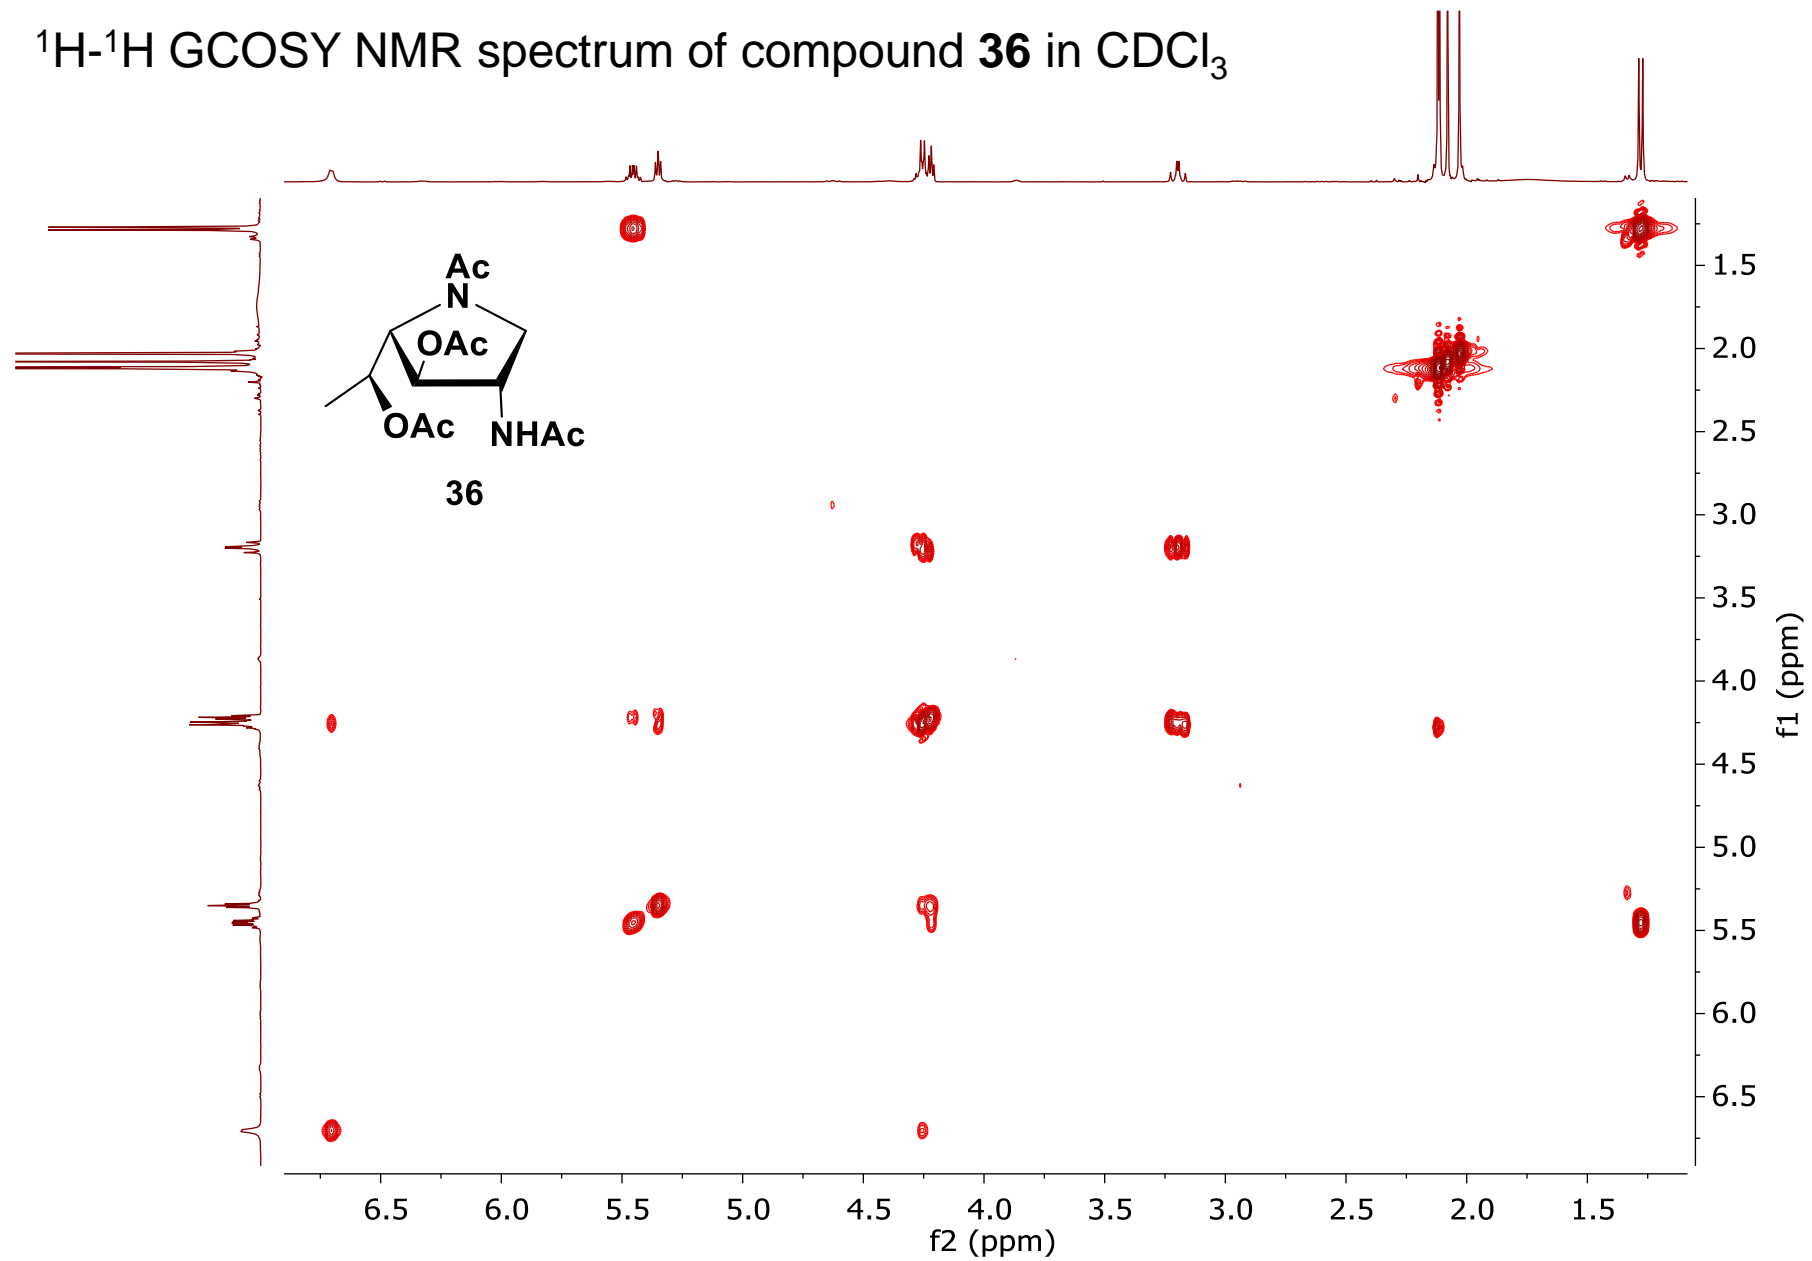

$^1\text{H}$ - $^{13}\text{C}$  GHSQC NMR spectrum of compound **36** in  $\text{CDCl}_3$

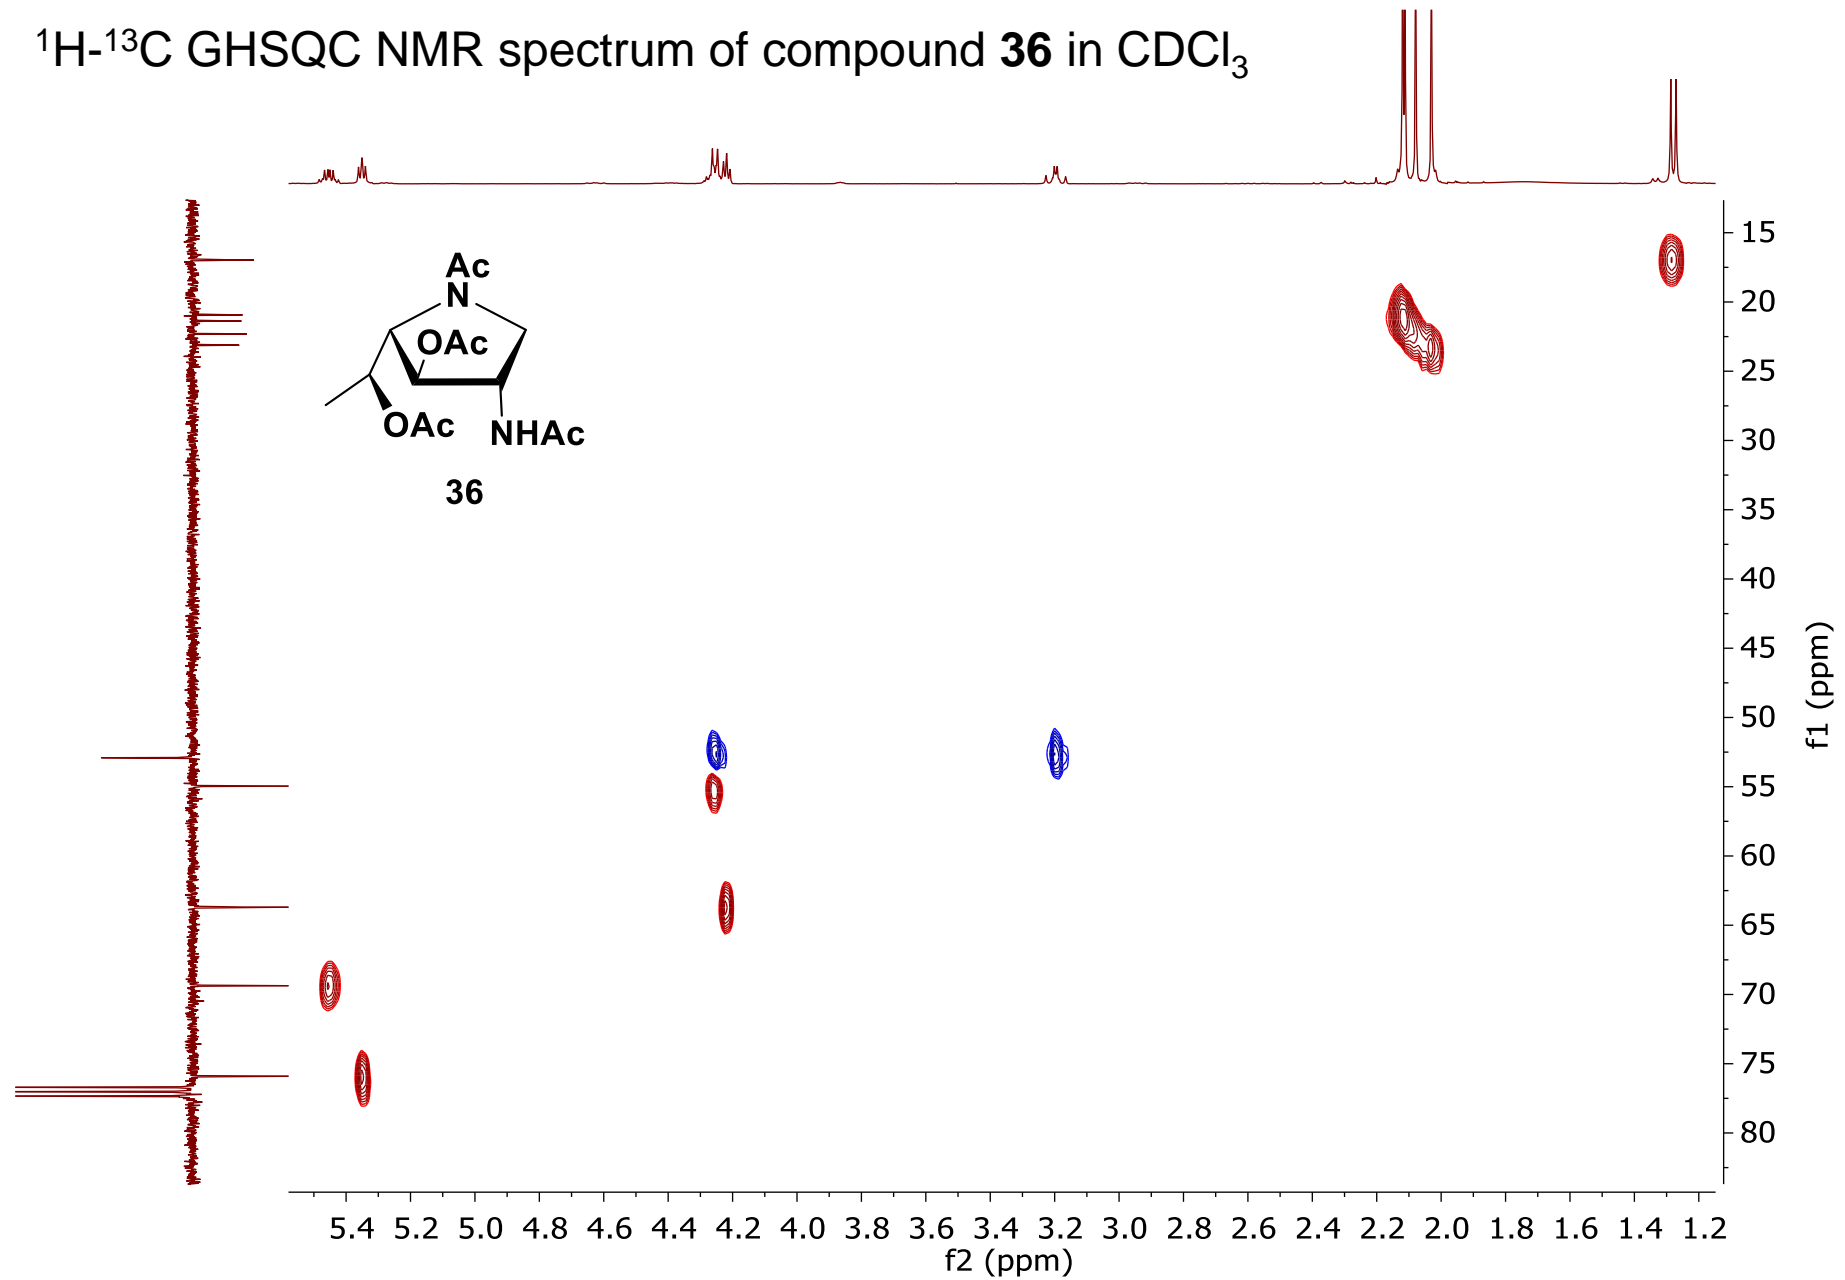

Supplement: d1ra01070k1.pdf [file d1ra01070k1.pdf]
